# Supplementary material
Source: PubMed Central journal article supplement (PMC6350813)

Hertwig et al. 2017: Formation of chondrules in a moderately high dust enriched disk: evidence from oxygen isotopes of chondrules from the Kaba CV3 chondrite

**EA1:** BSE mosaic of the Kaba USNM 1052-1 thin section and BSE images of individual chondrules including positions of SIMS measurements

excl.: Analysis excluded because of pit imperfections (see EA2)

Ol: Olivine; Lpx: low-Ca pyroxene; IntPx: intermediate pyroxene



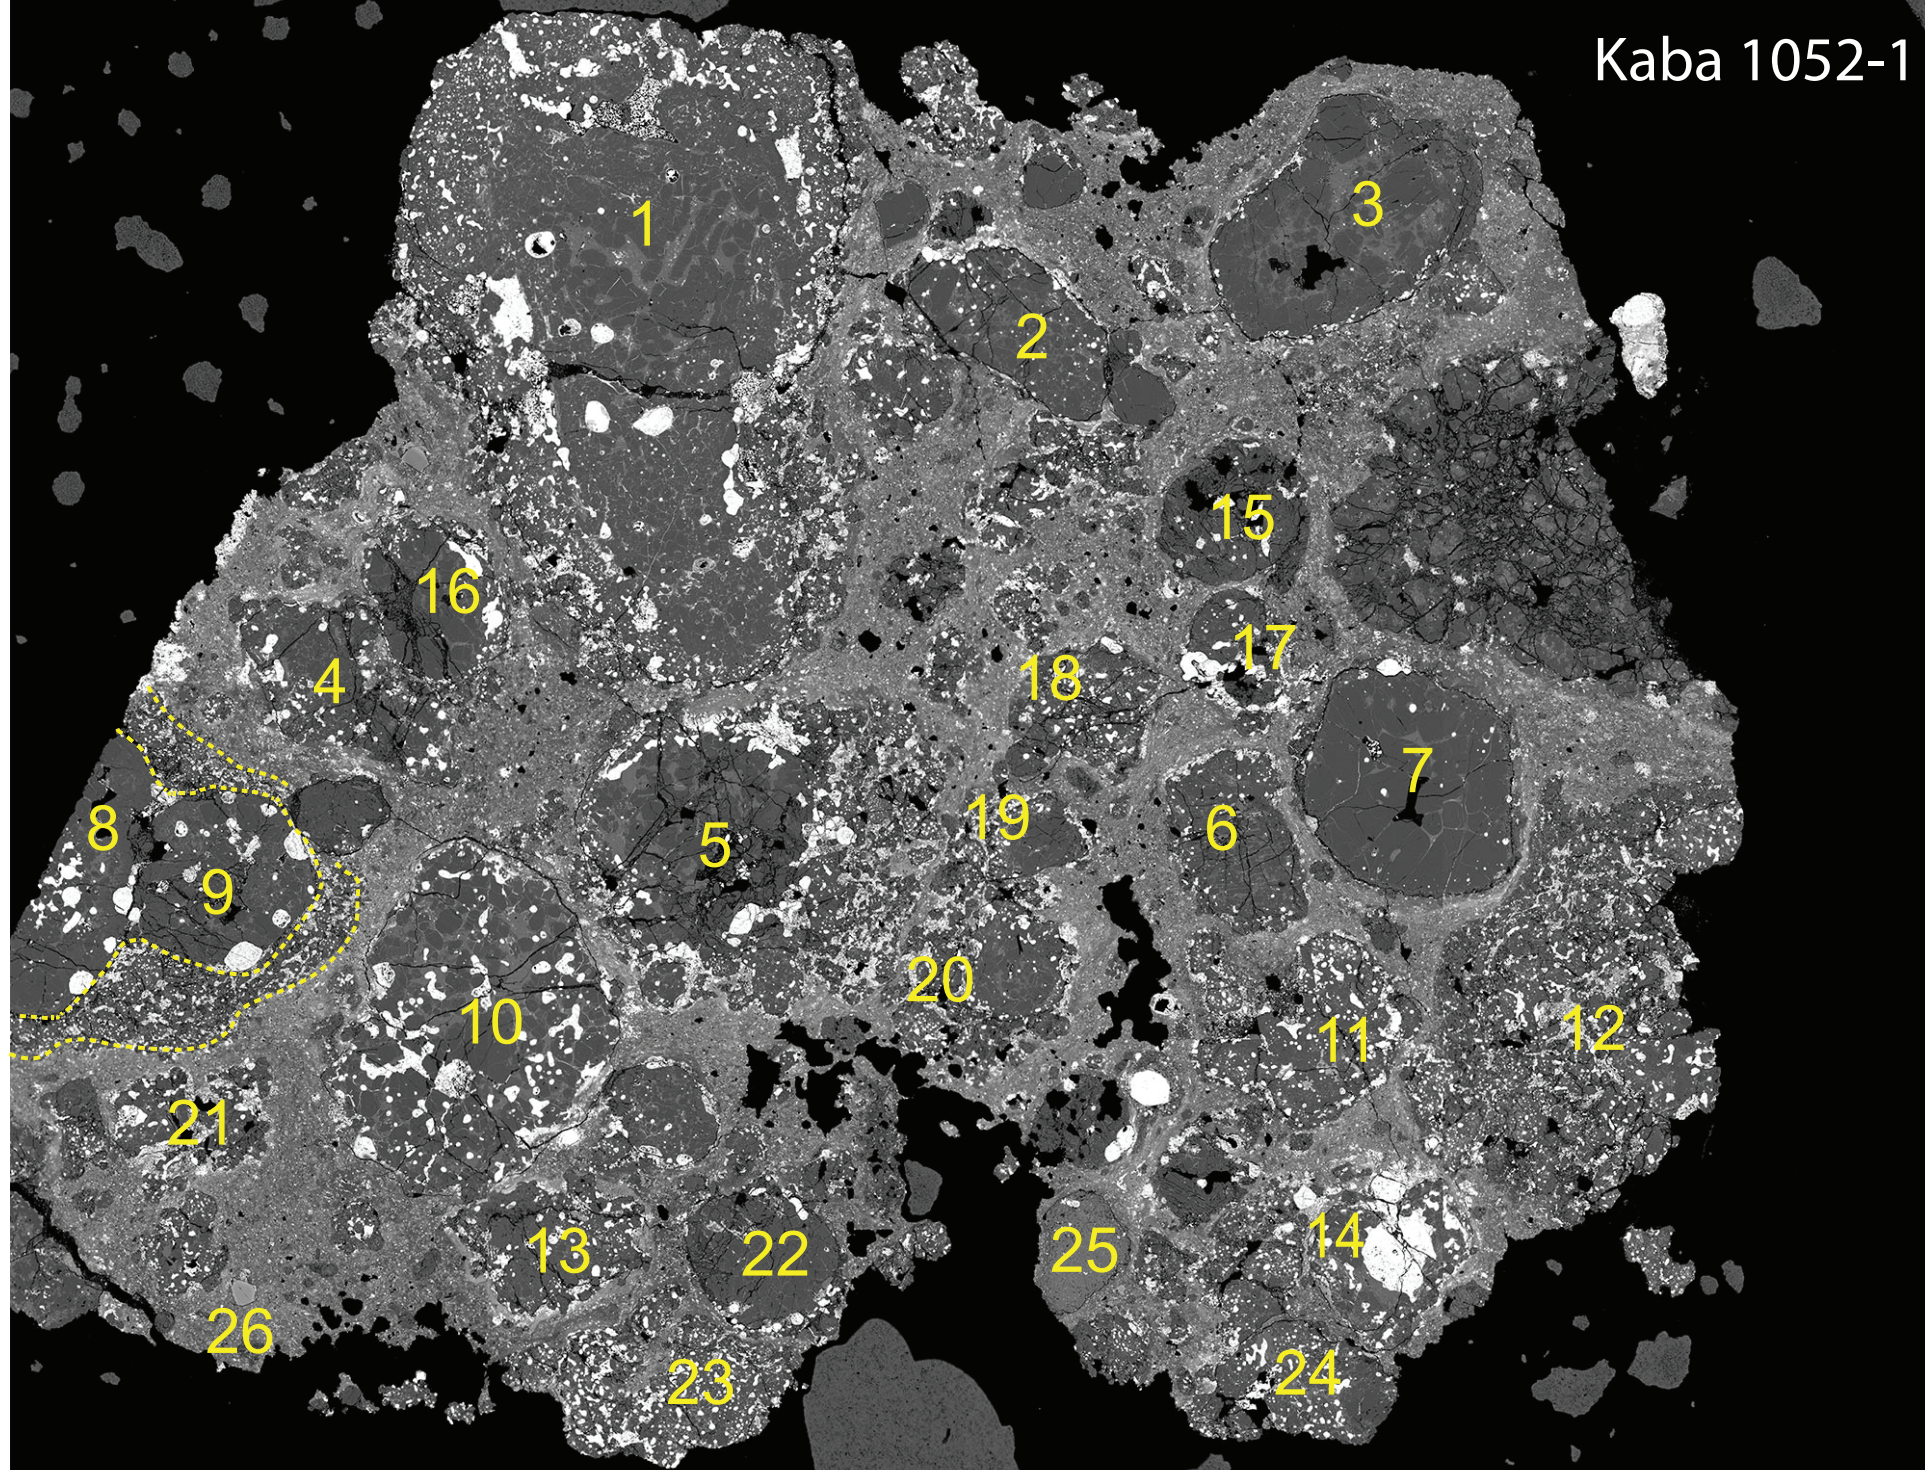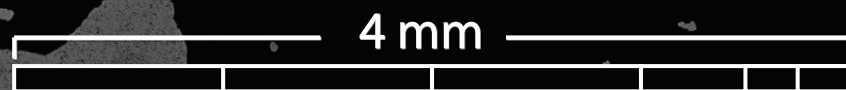



# #1

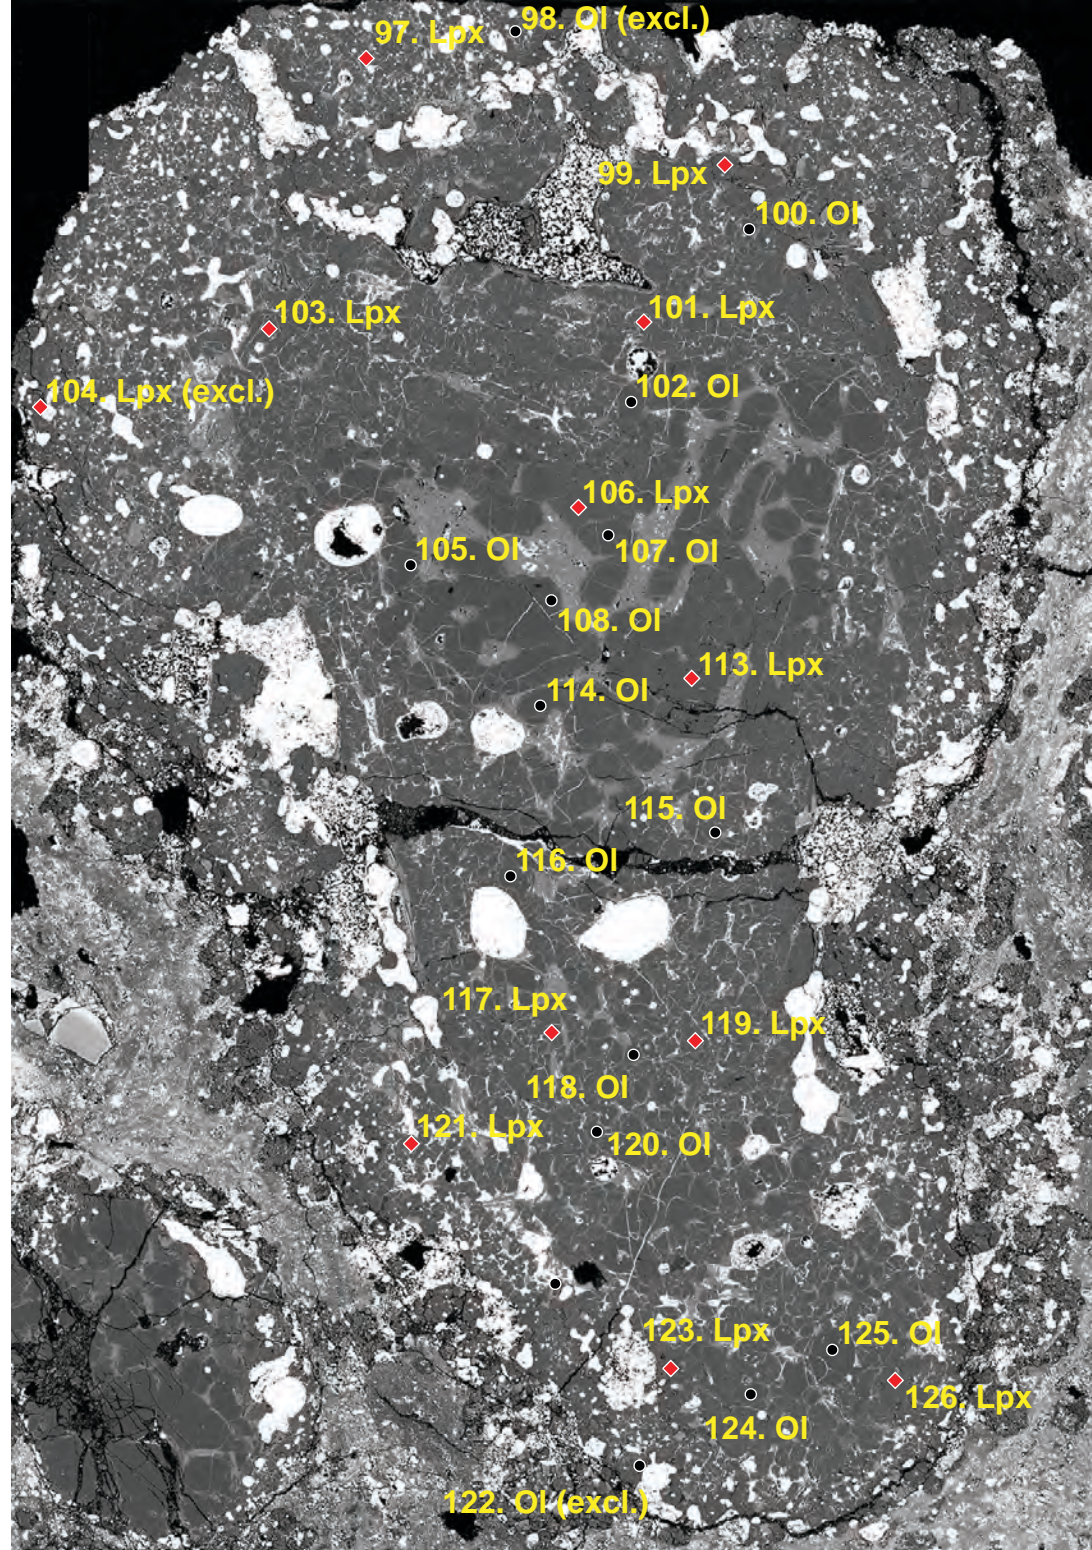



# #2

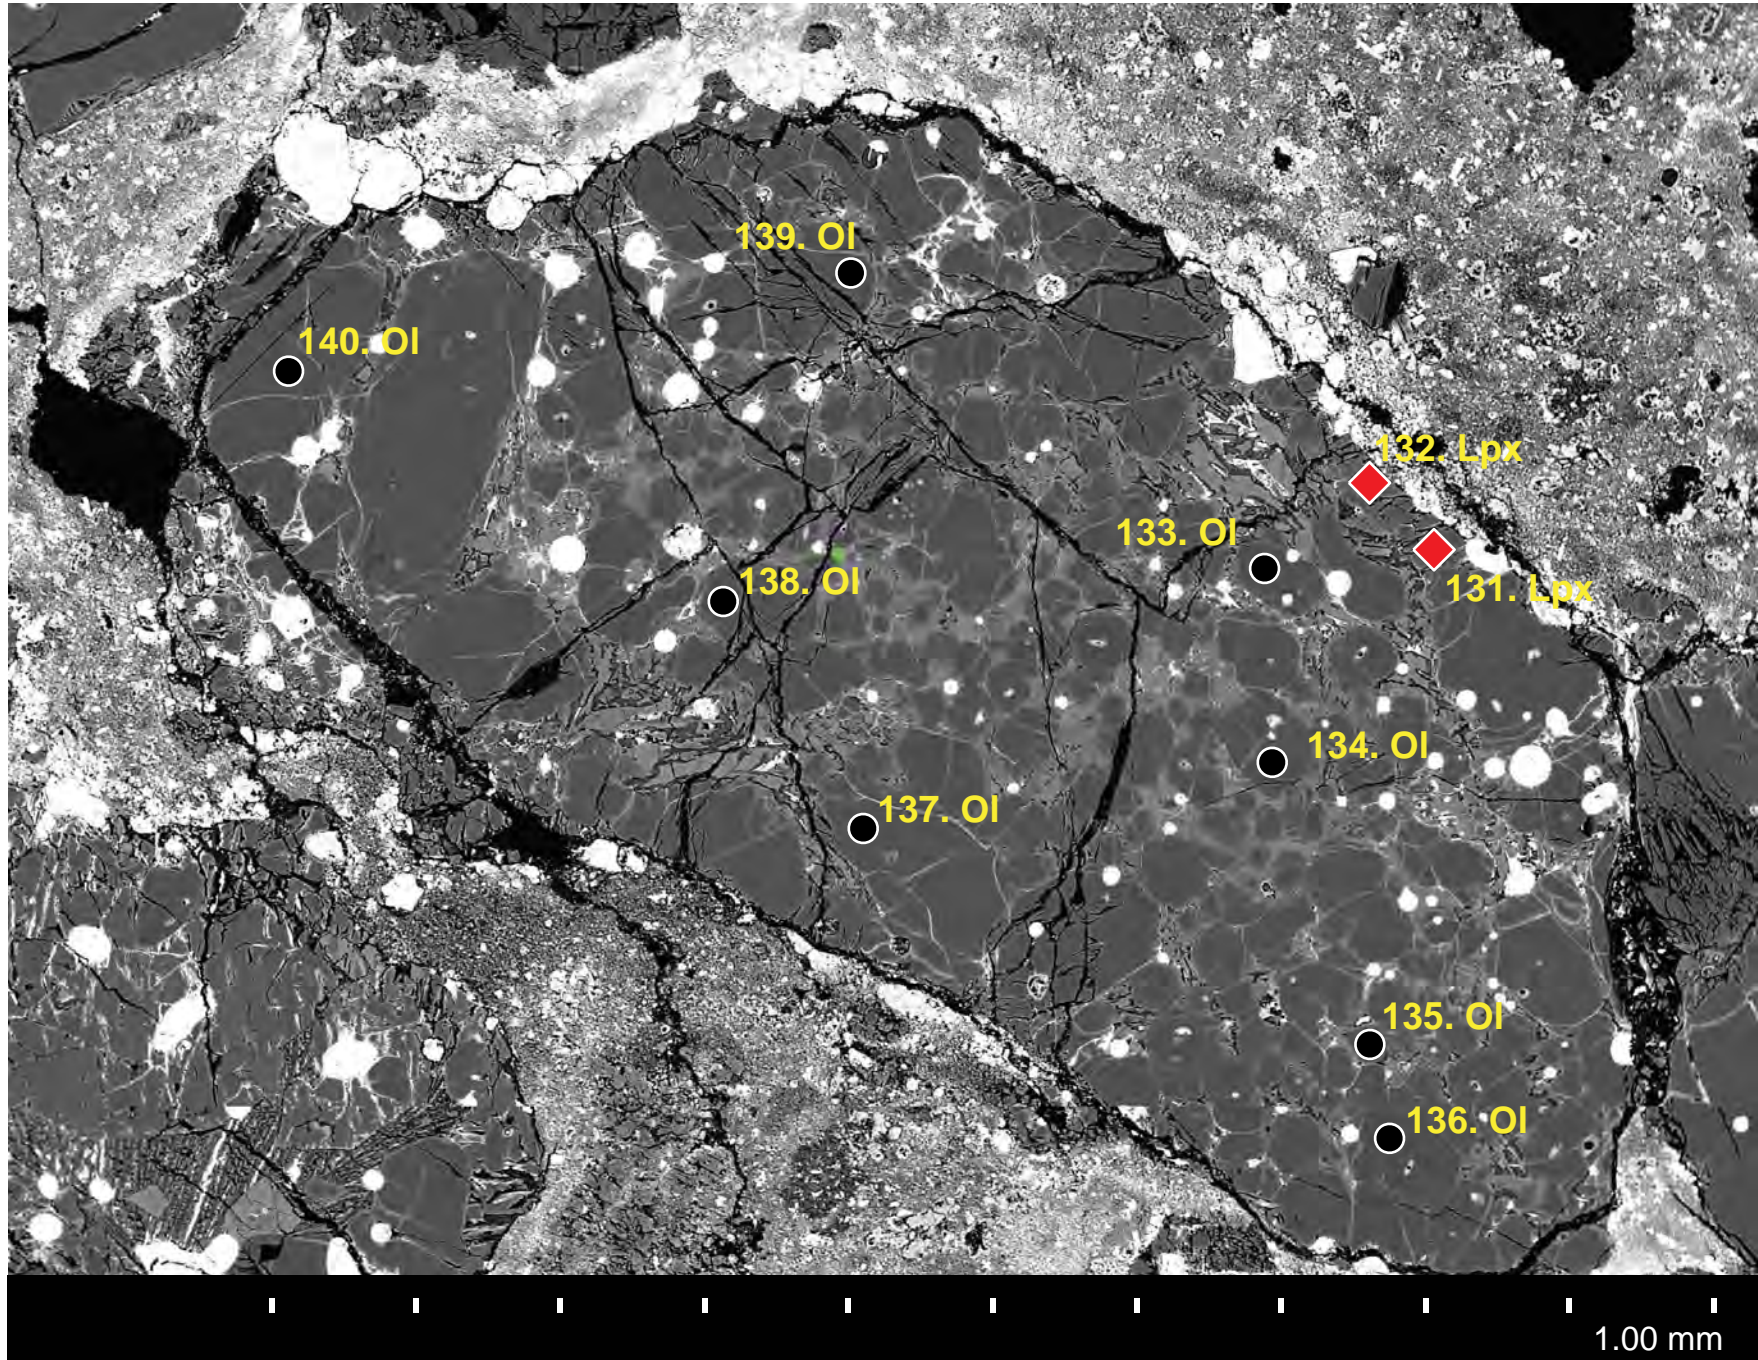



# #3

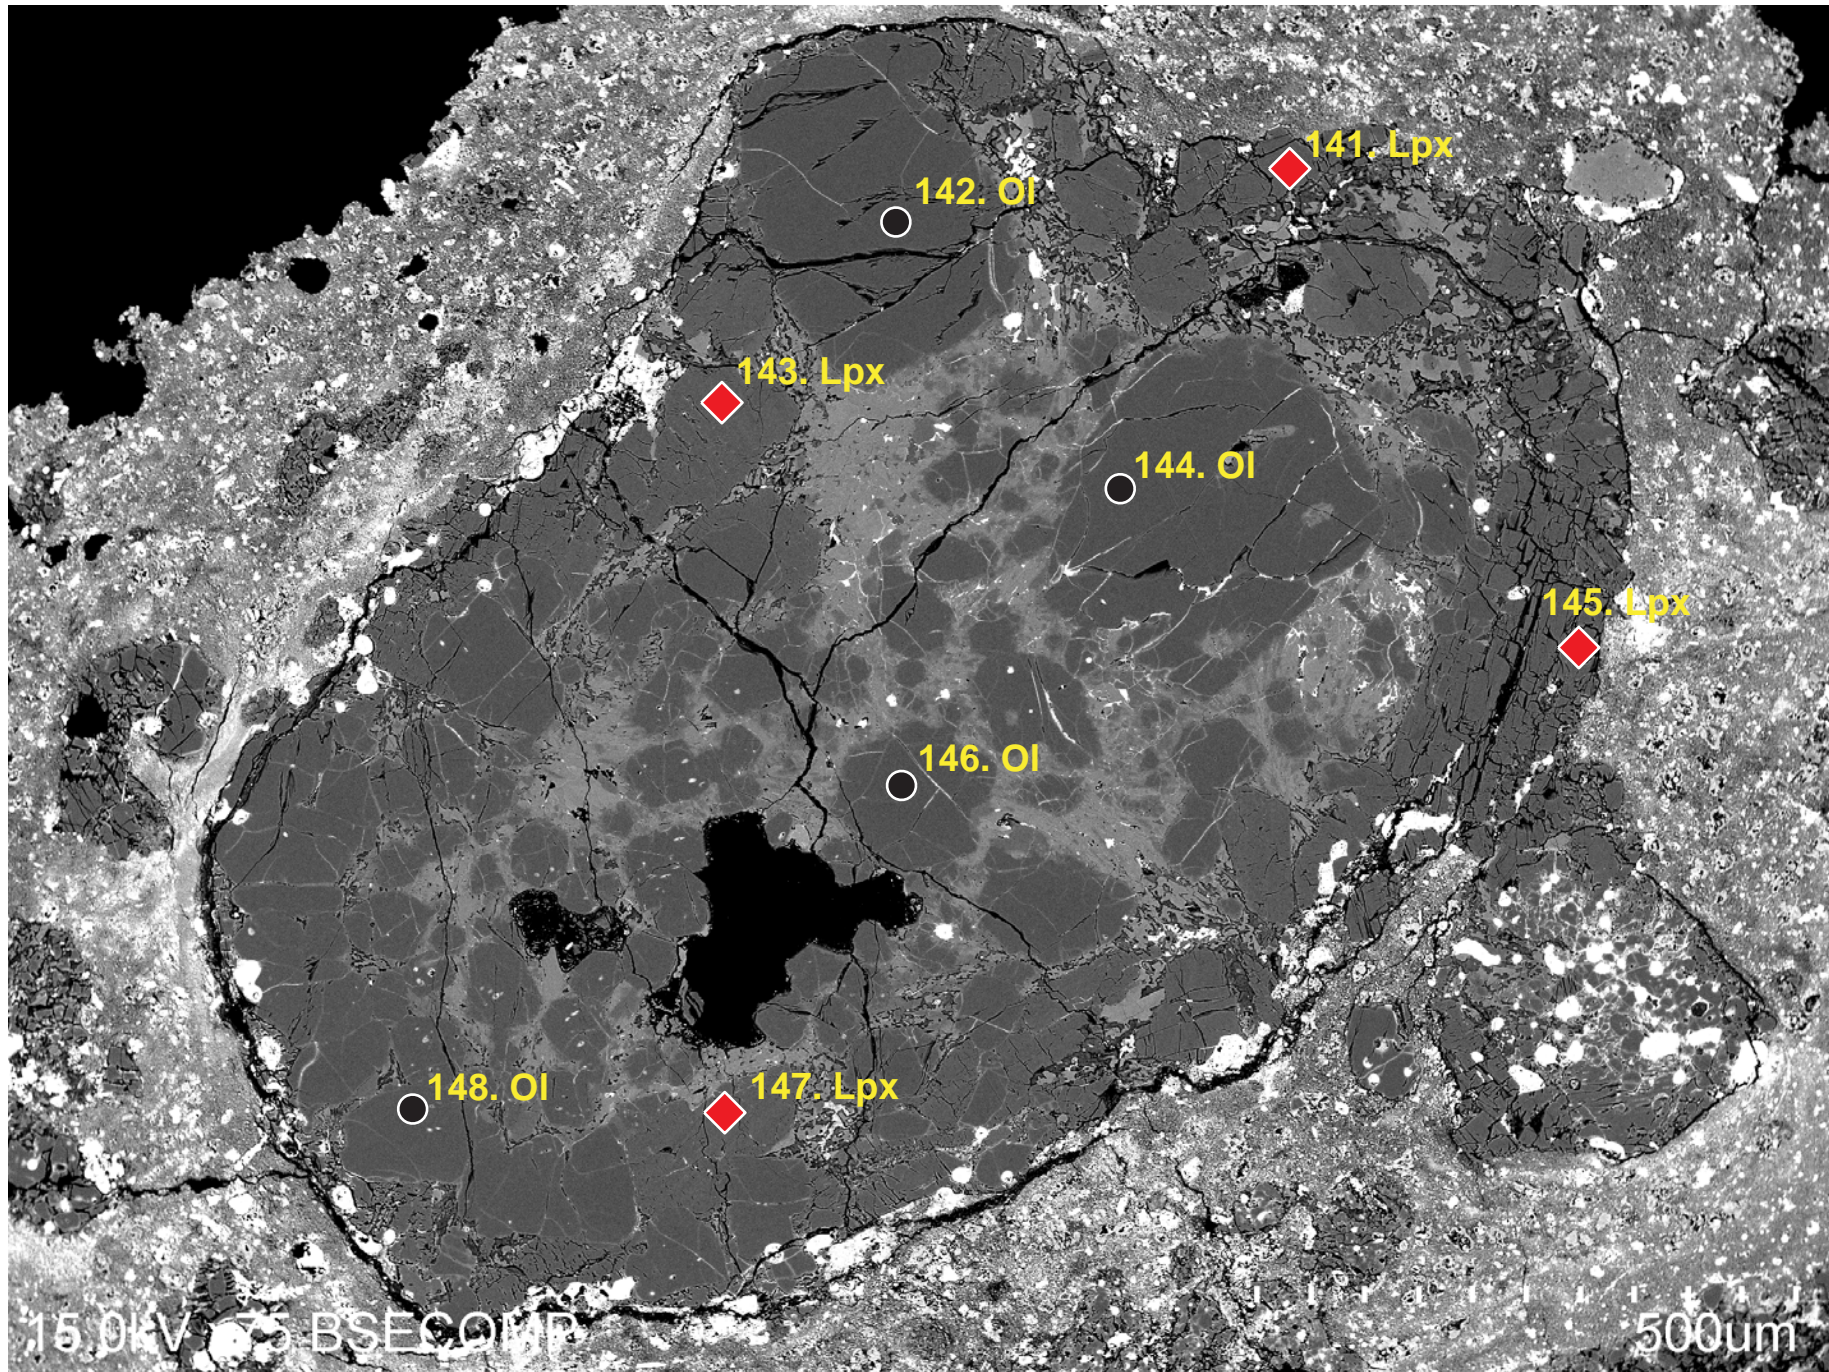



# #4

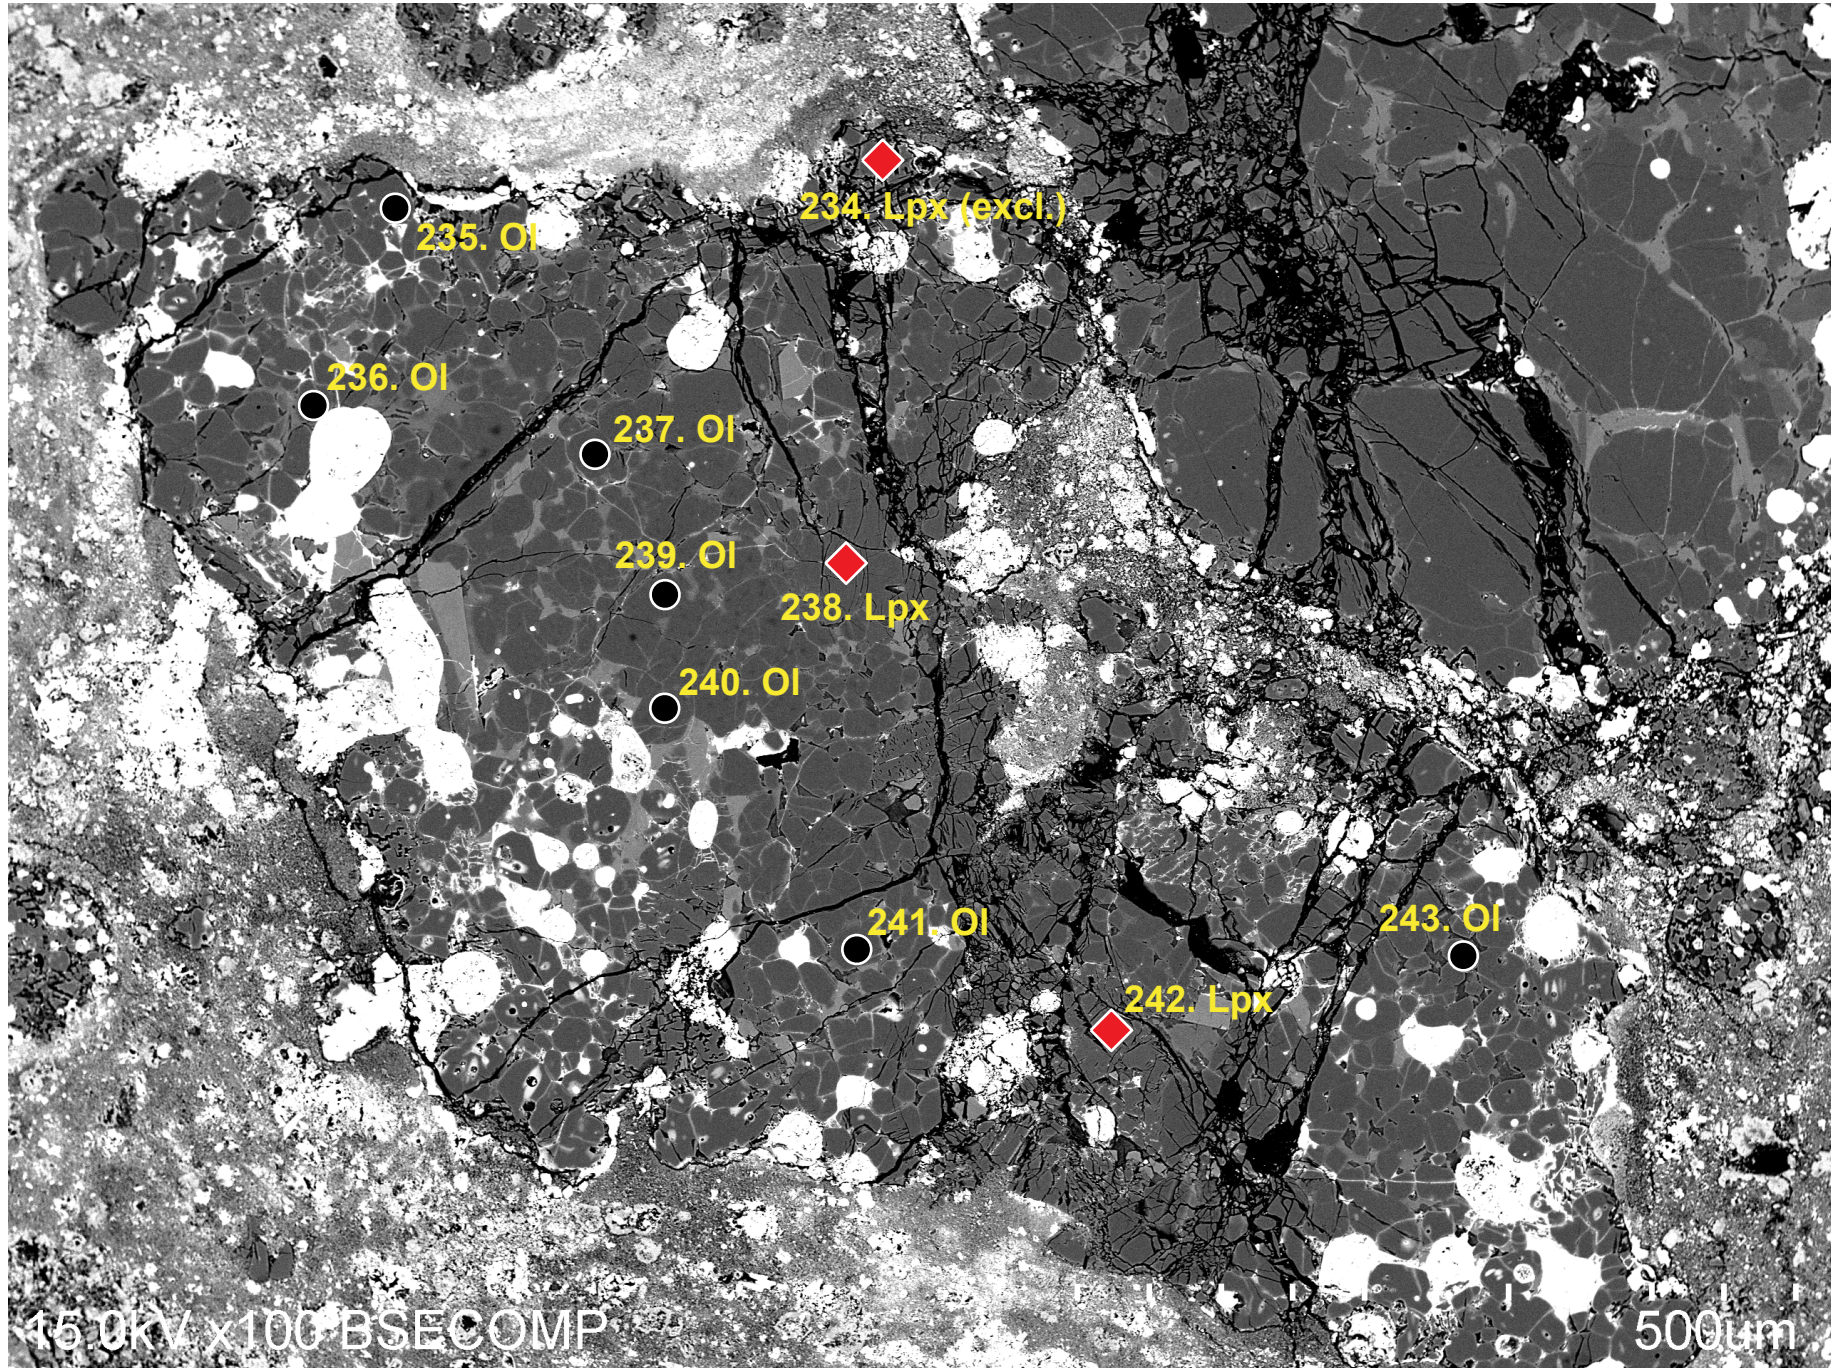



# #5

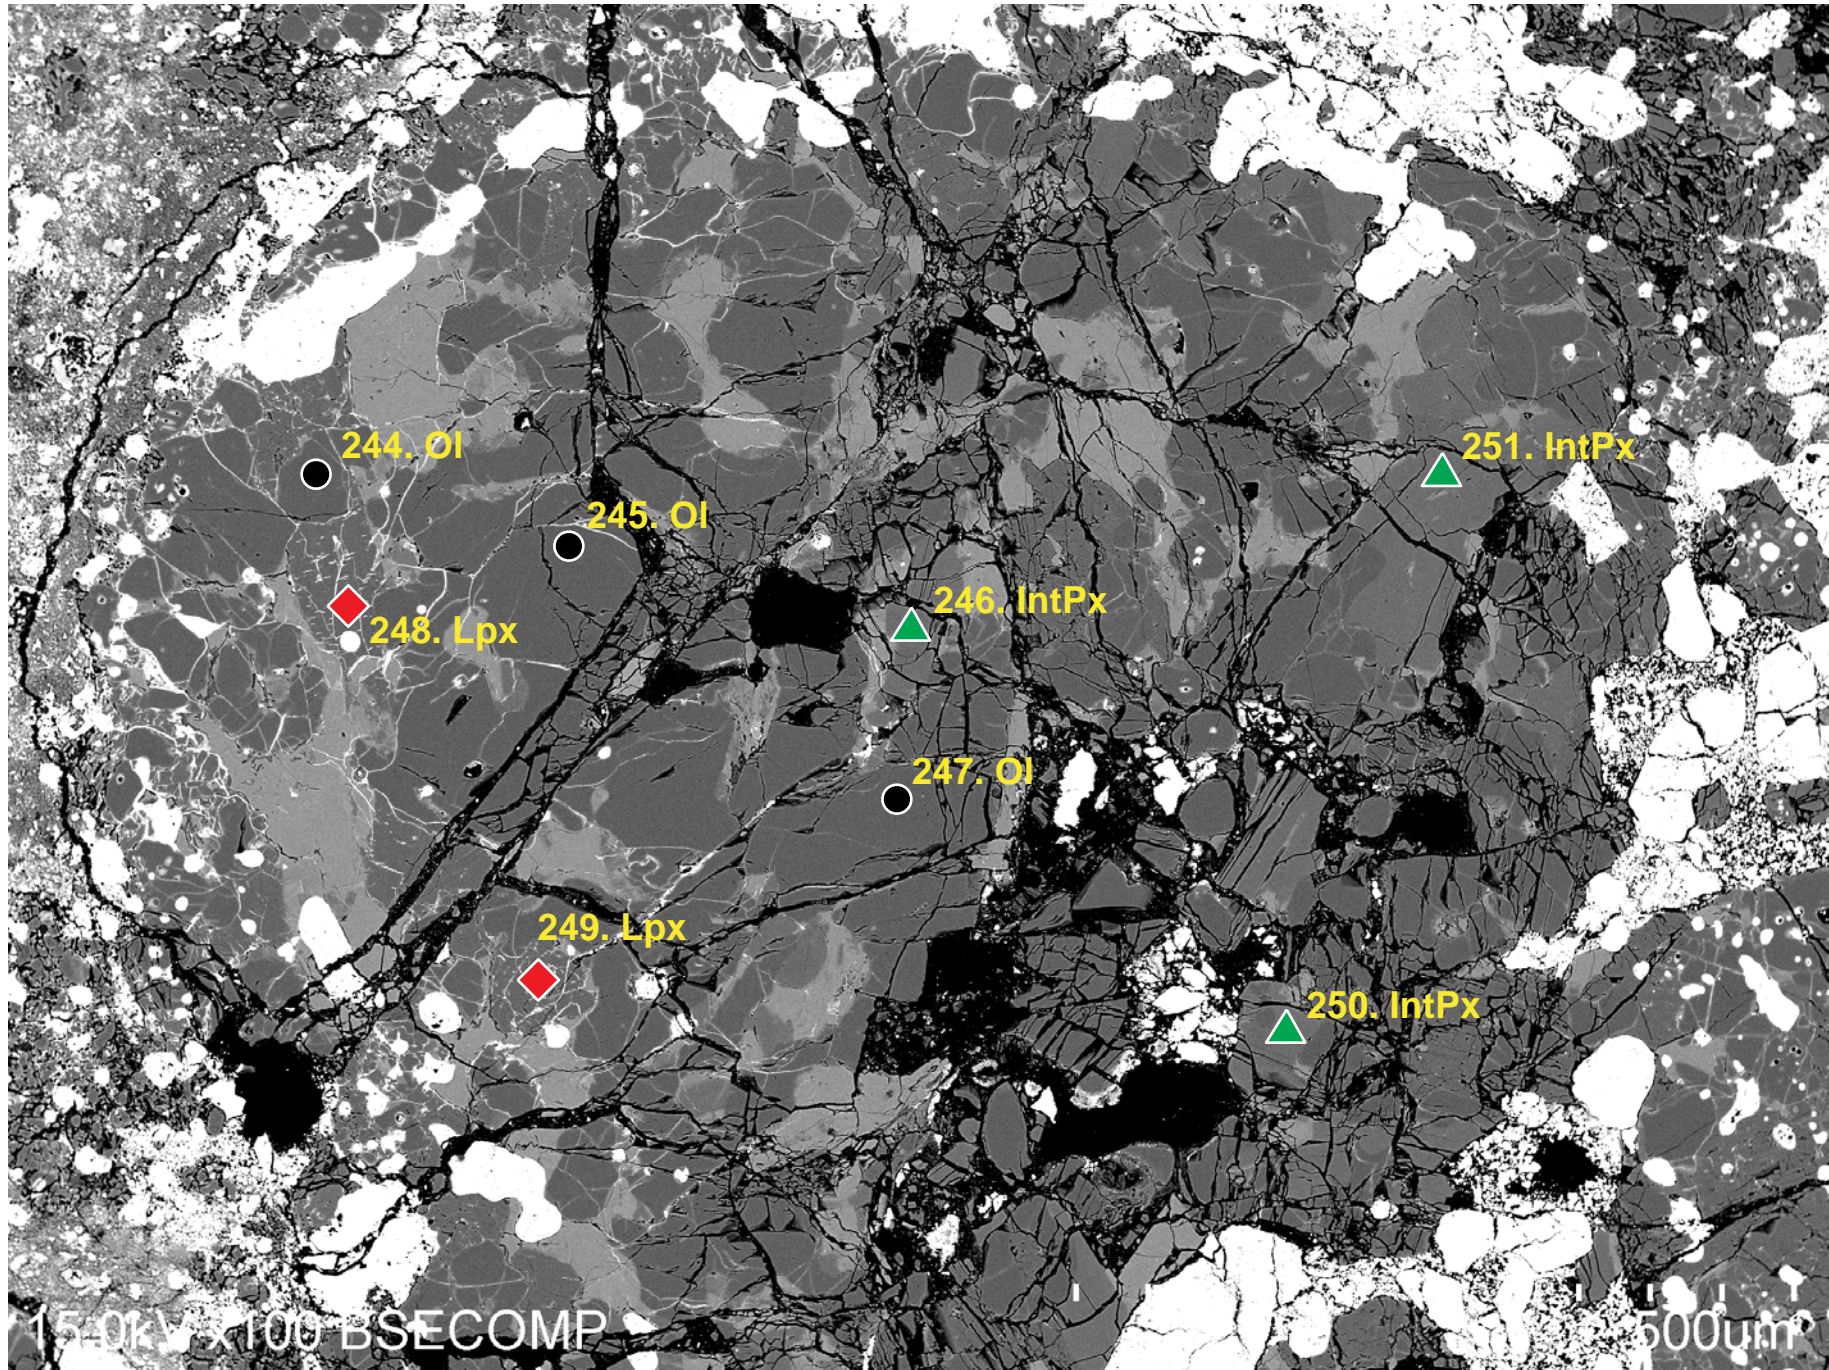



# #6

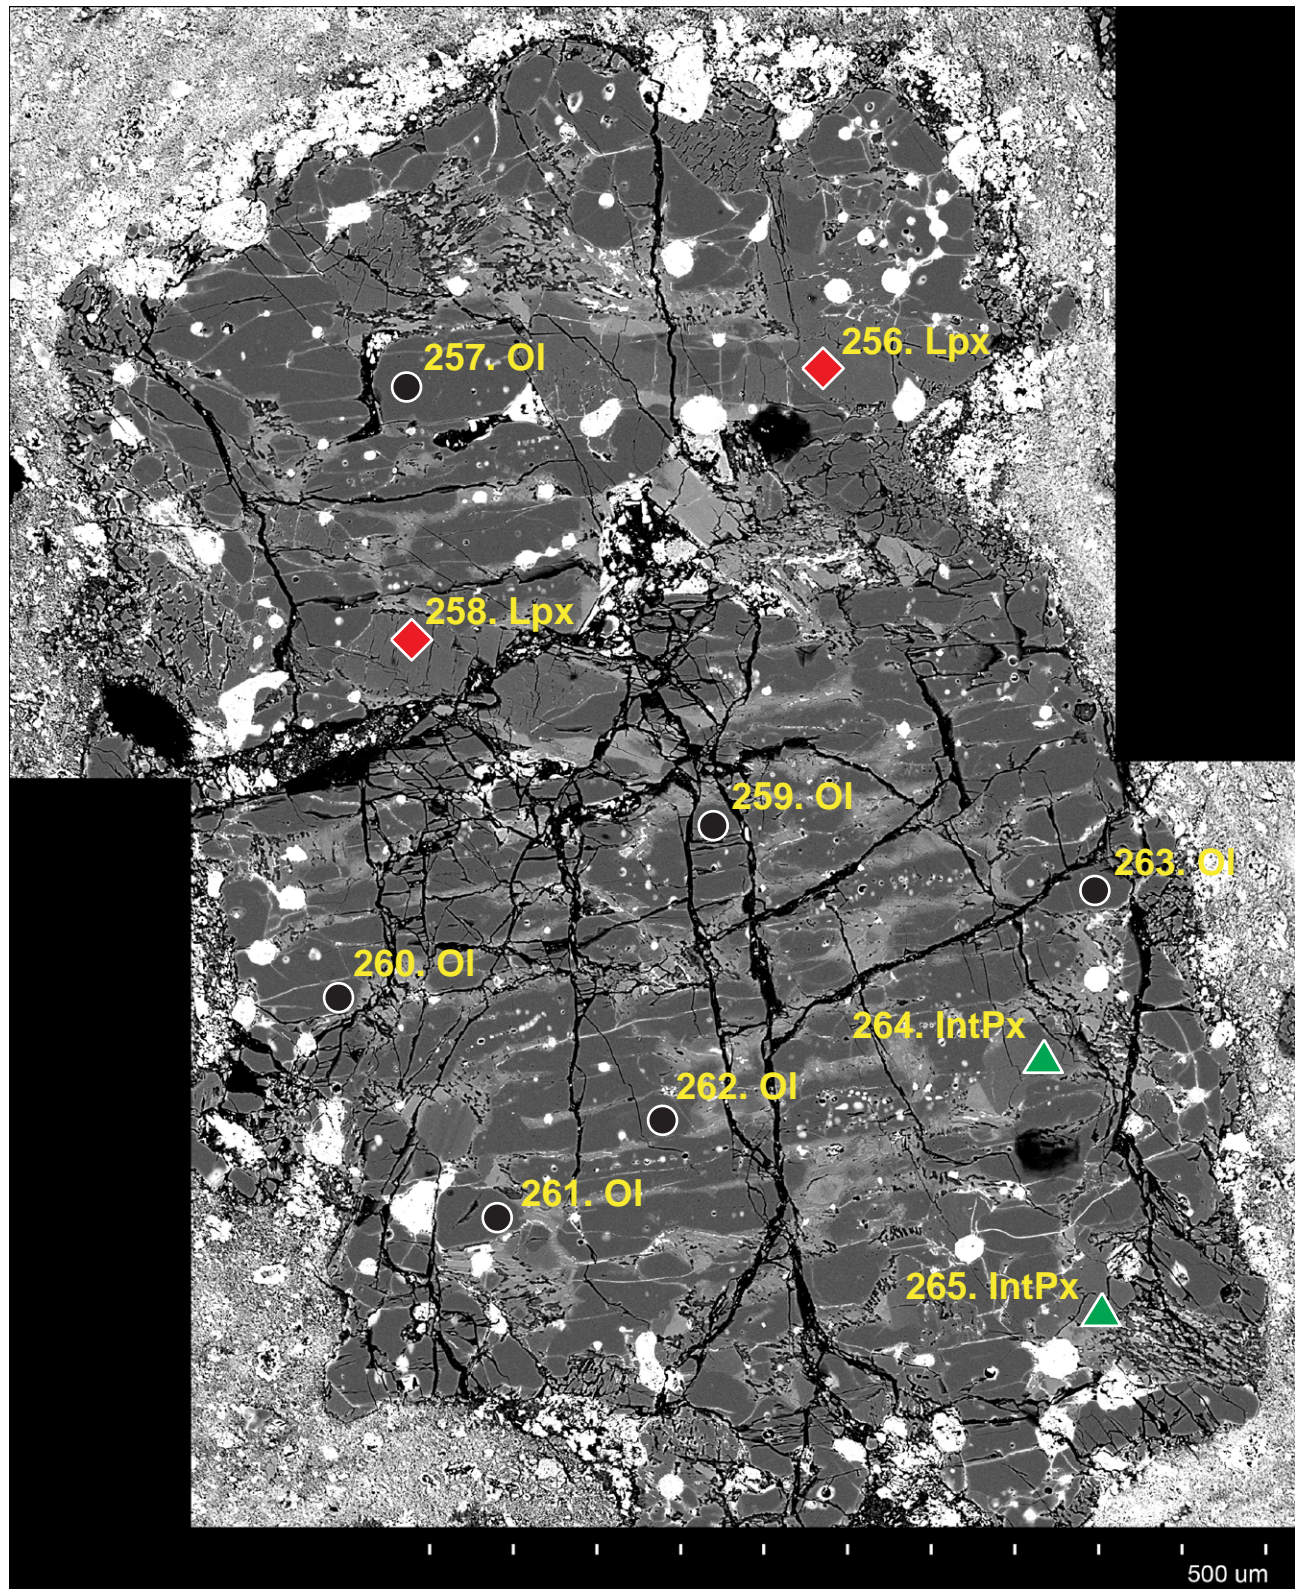



# #7

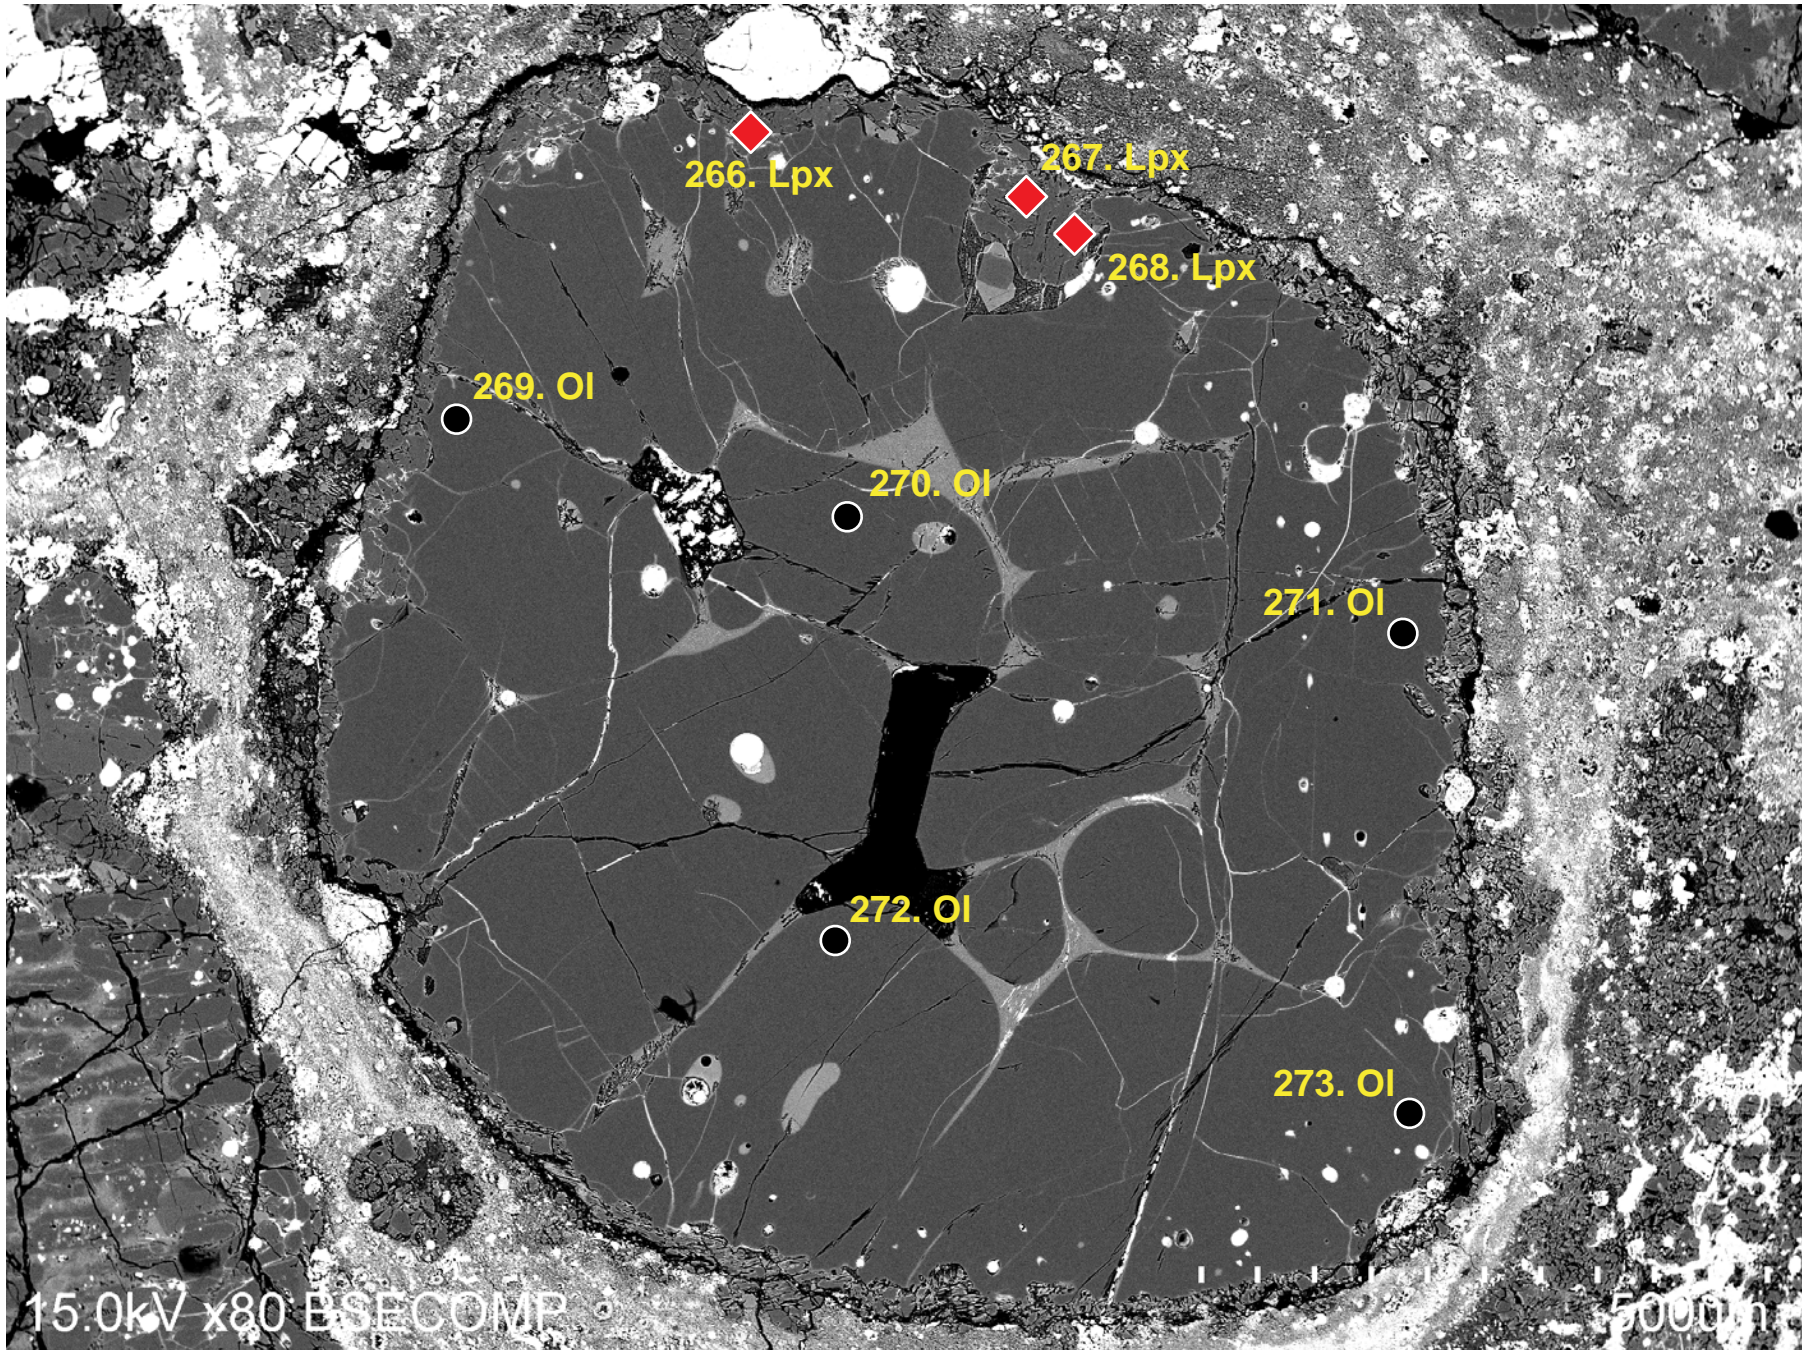



#8, 9,  
(8+9)

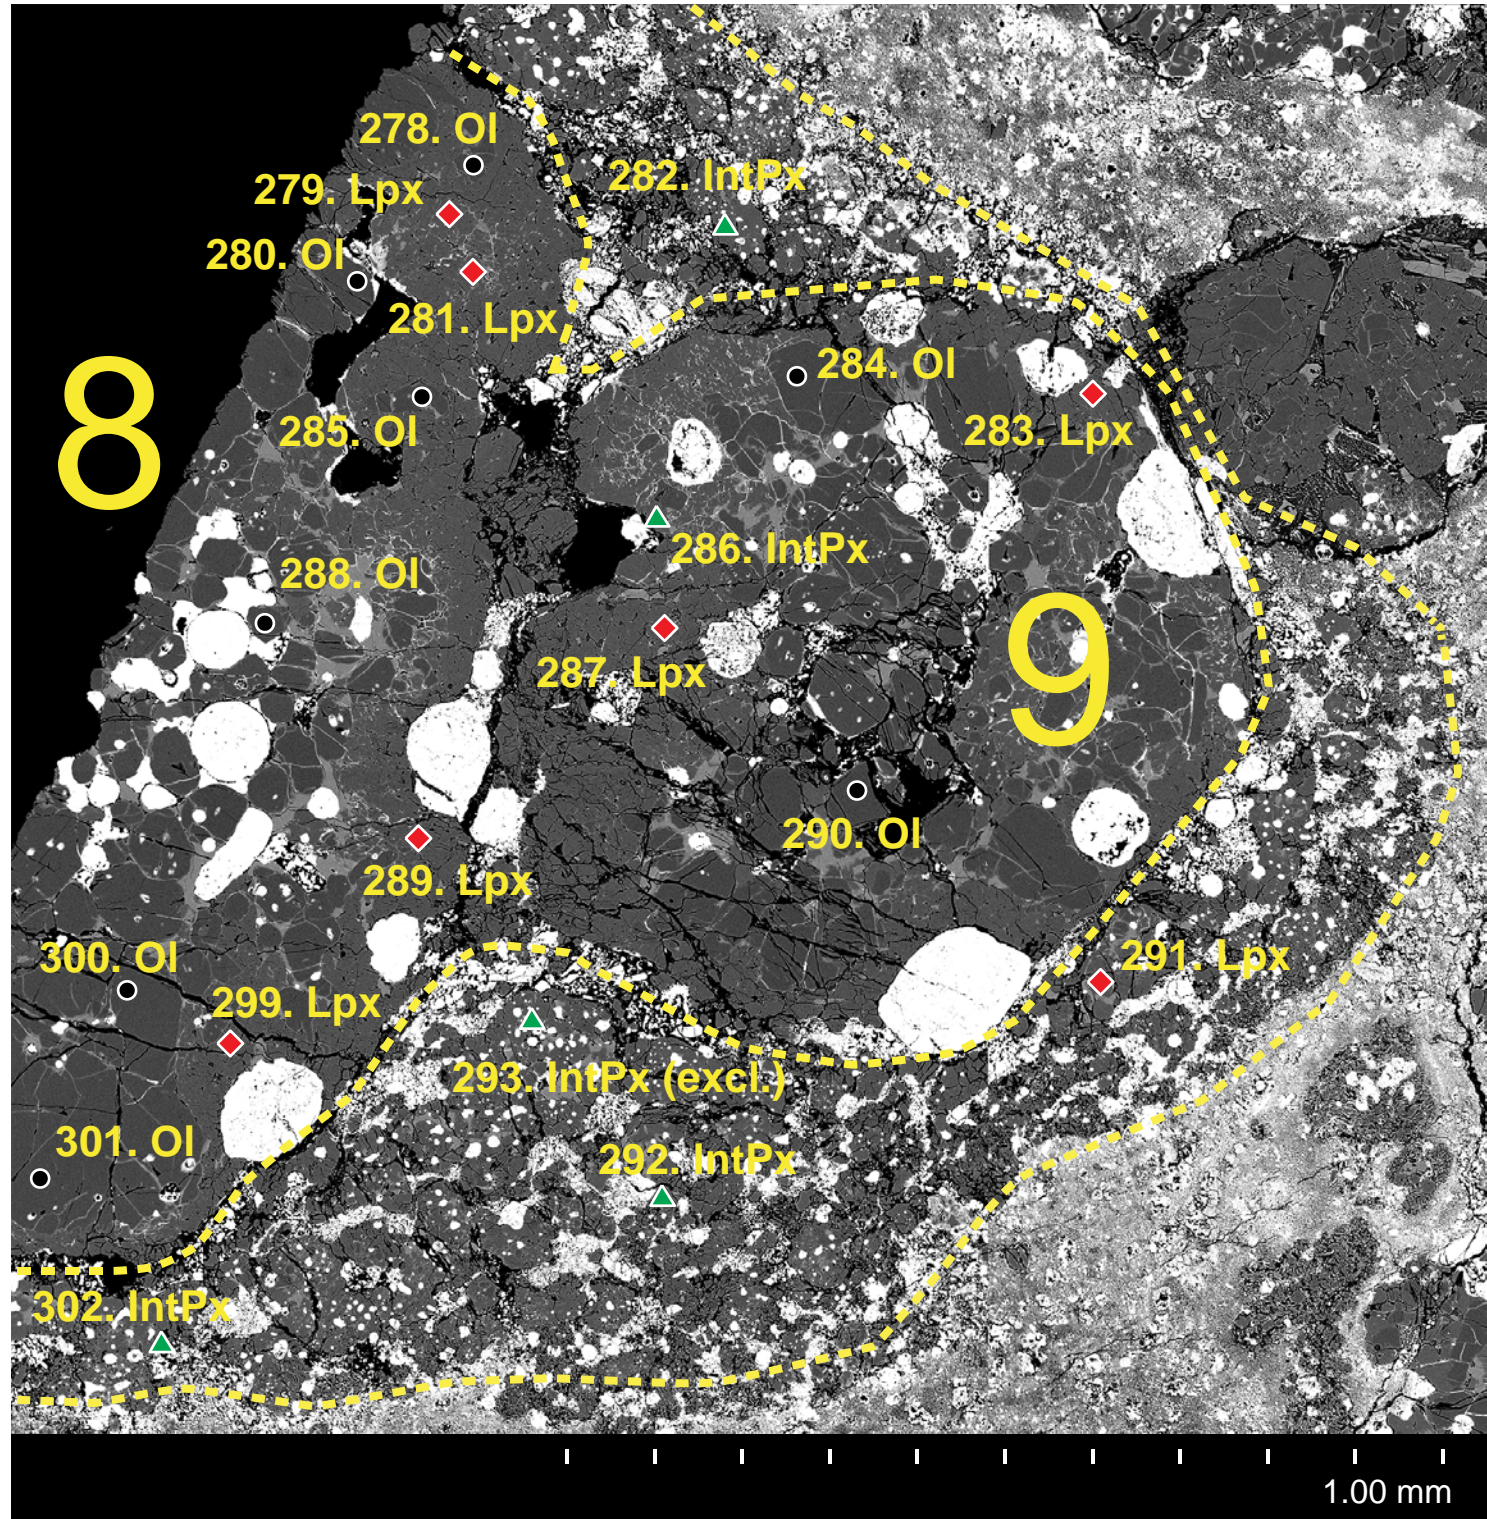



# #10

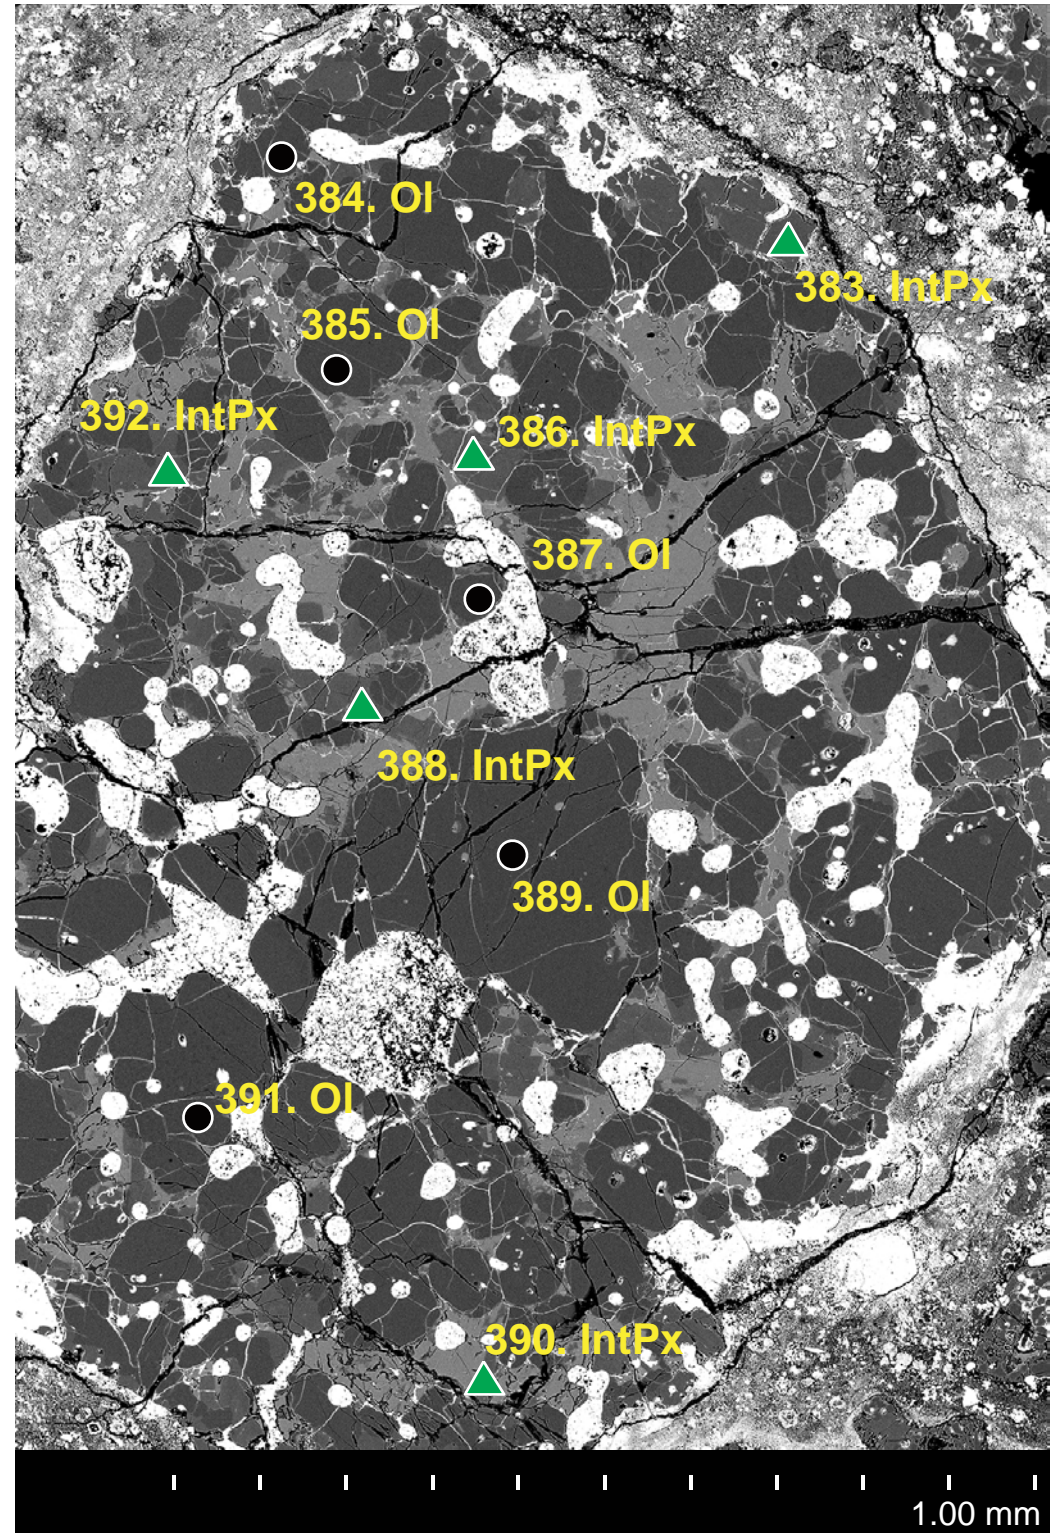



# #11

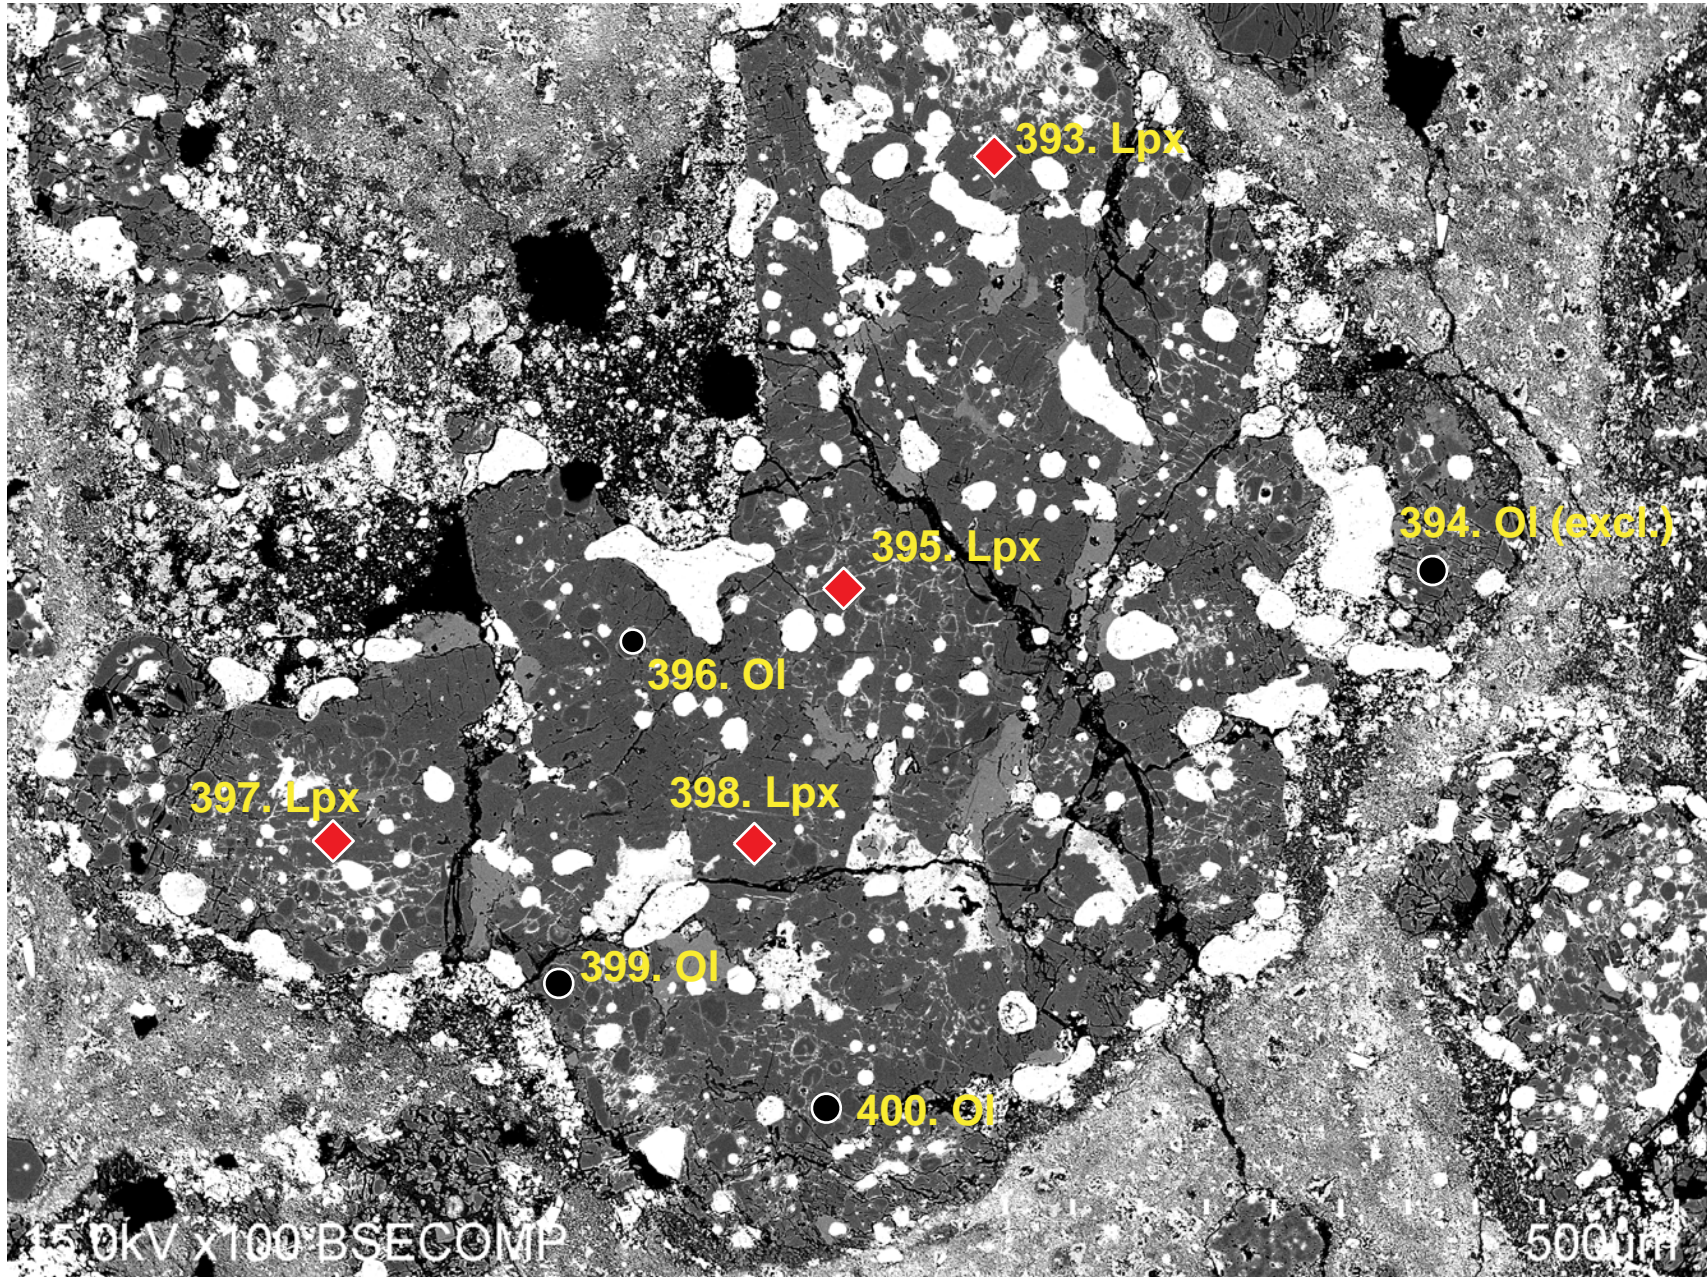



# #12

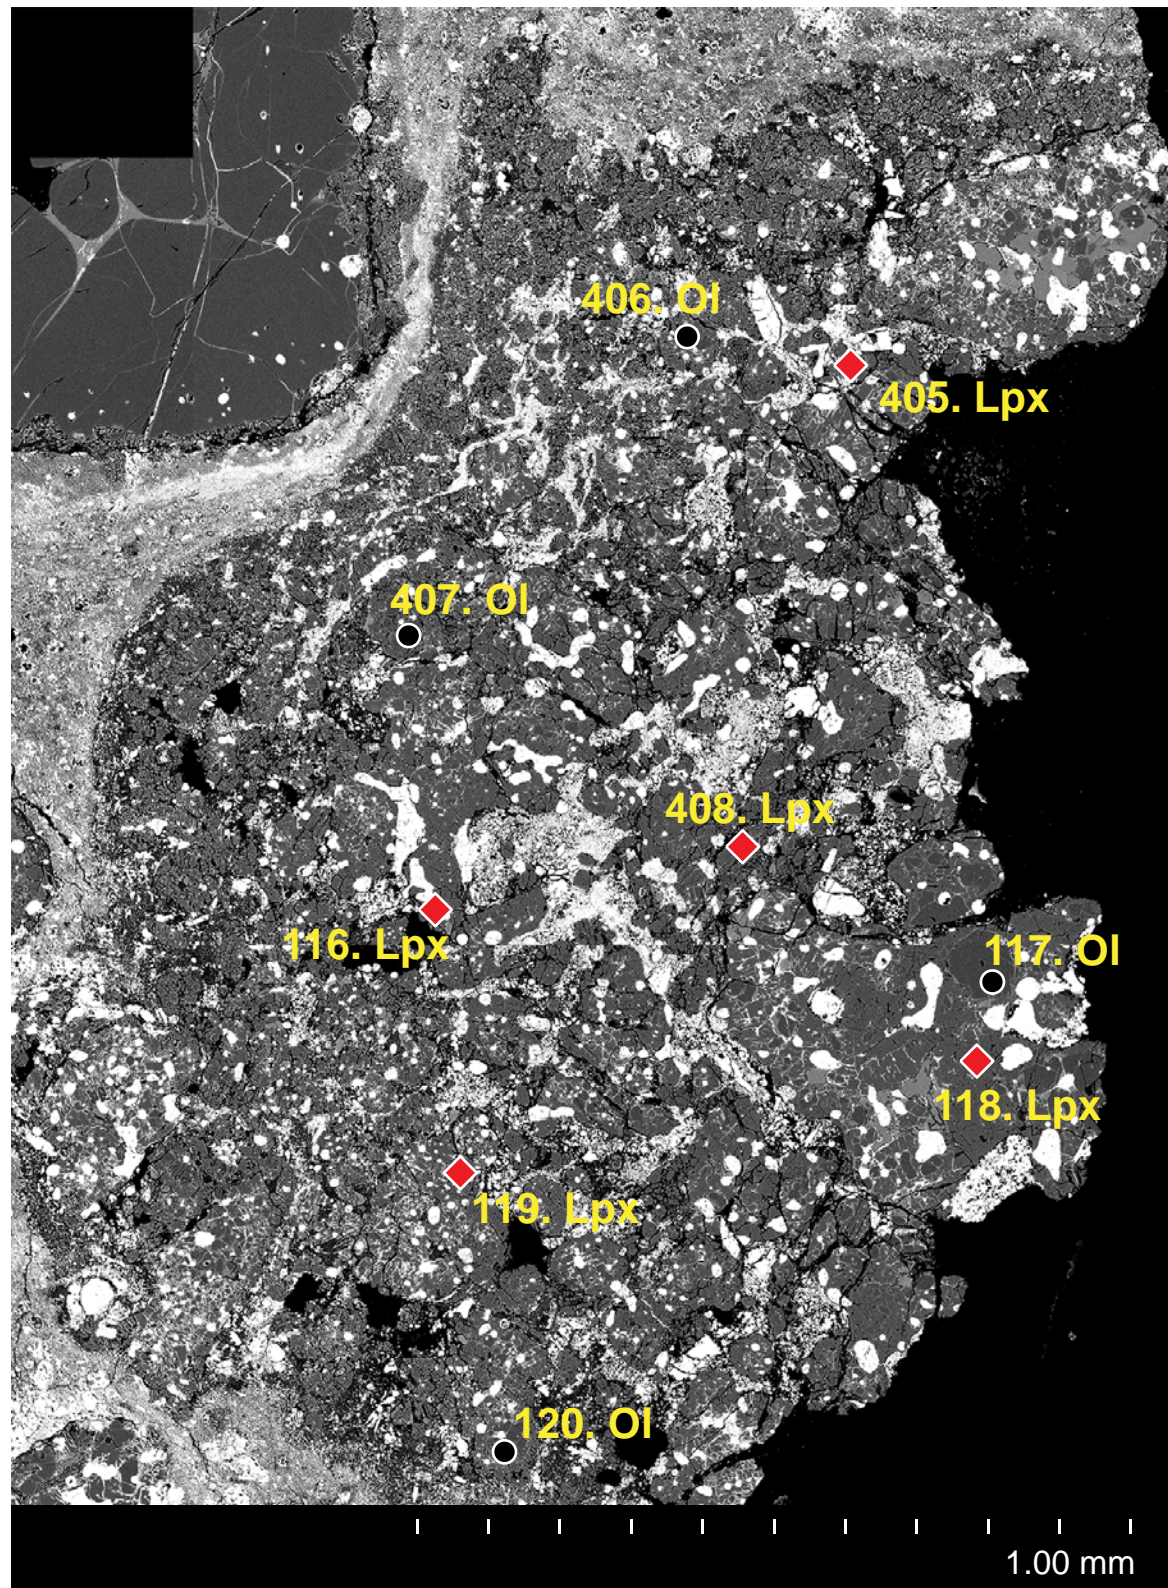



# #13

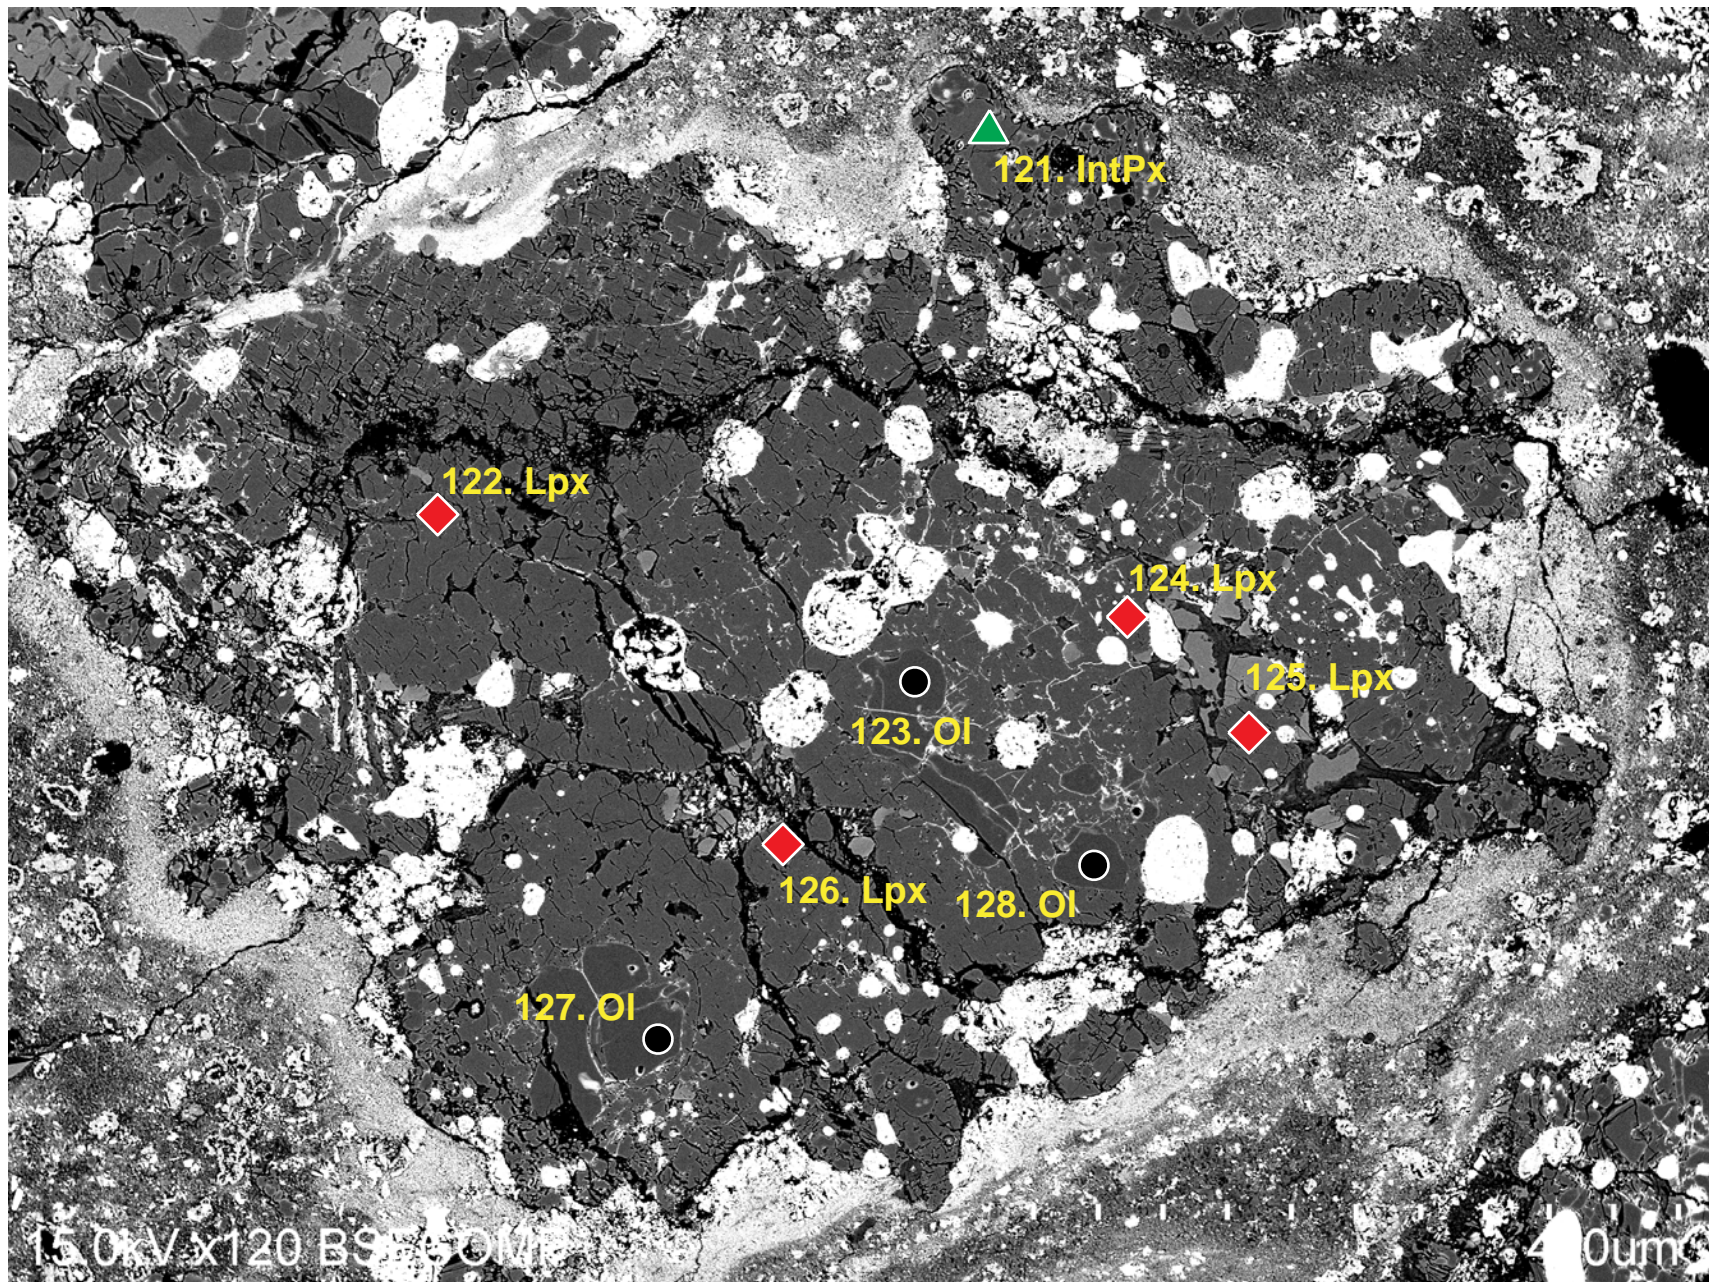



# #14

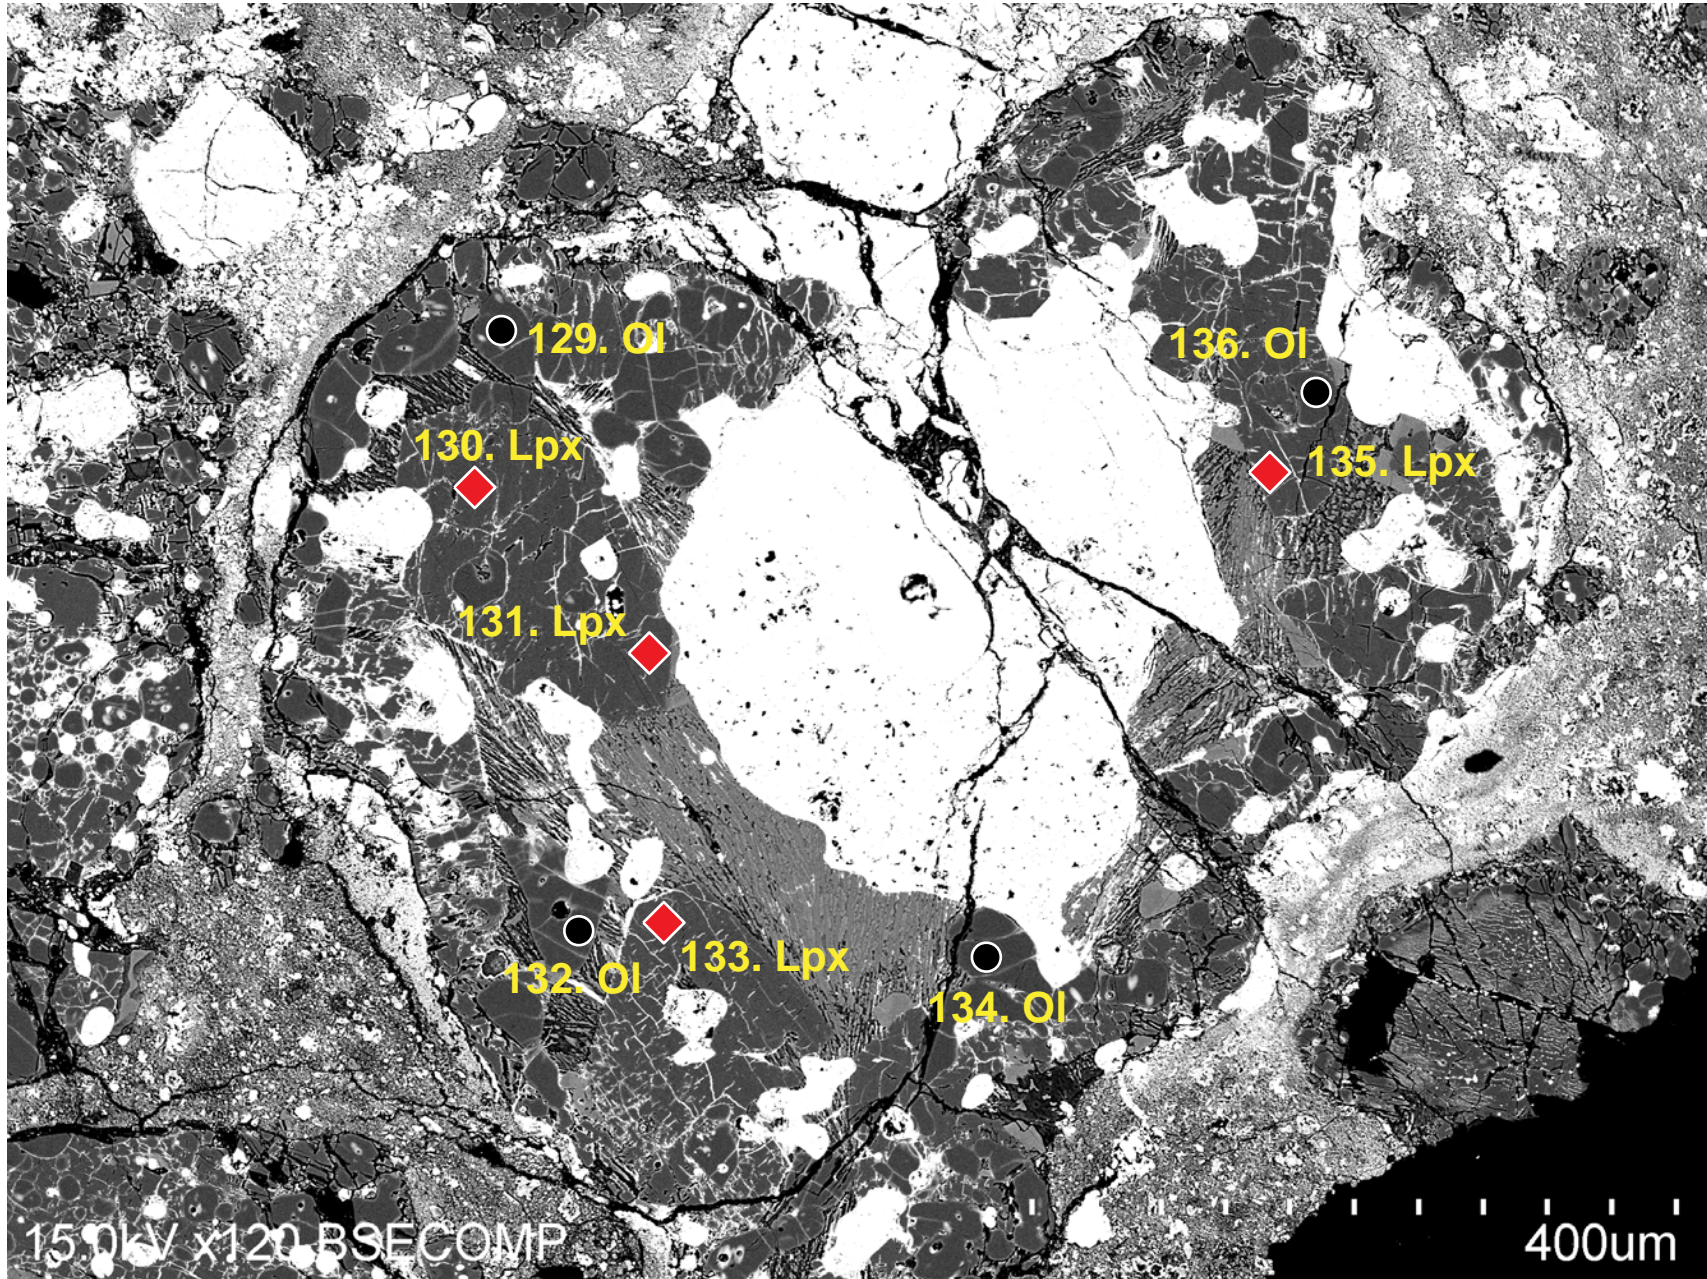



# #15

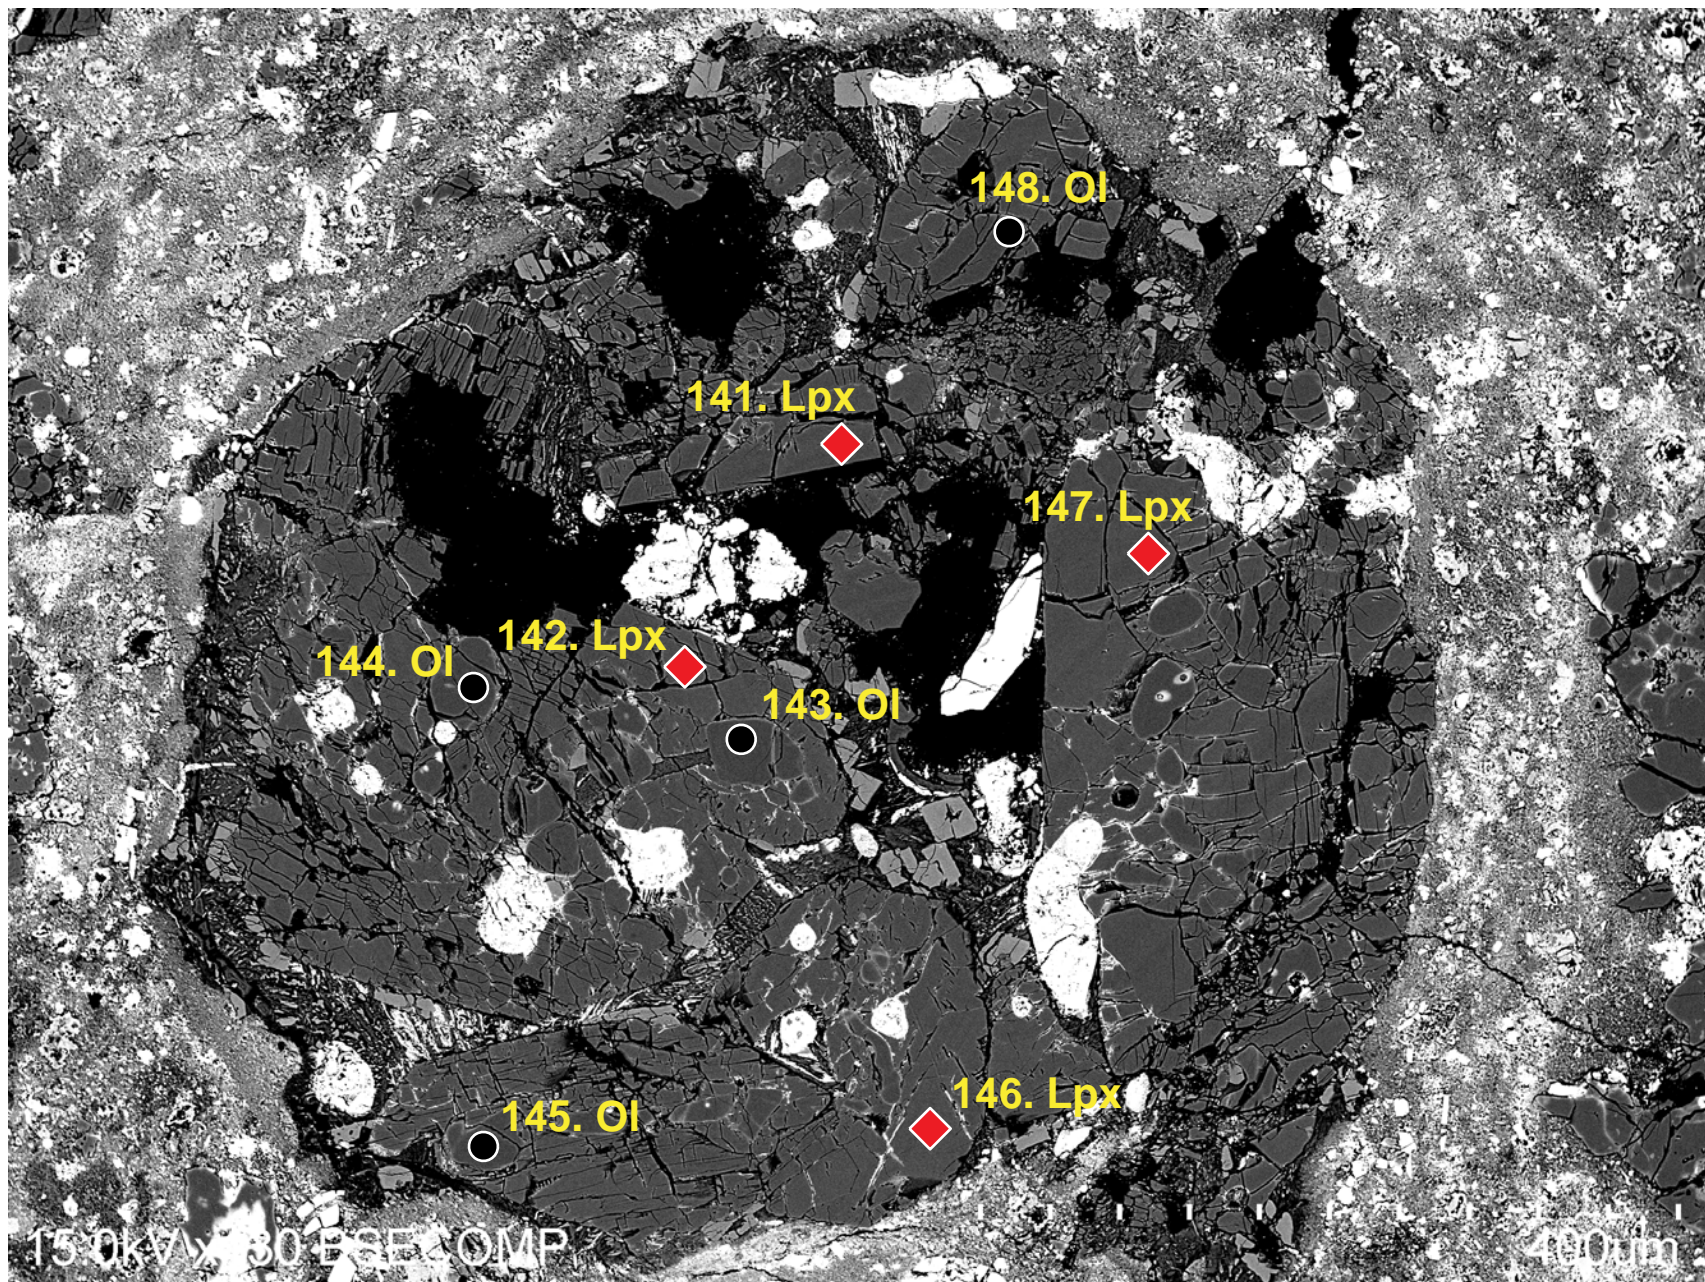



# #16

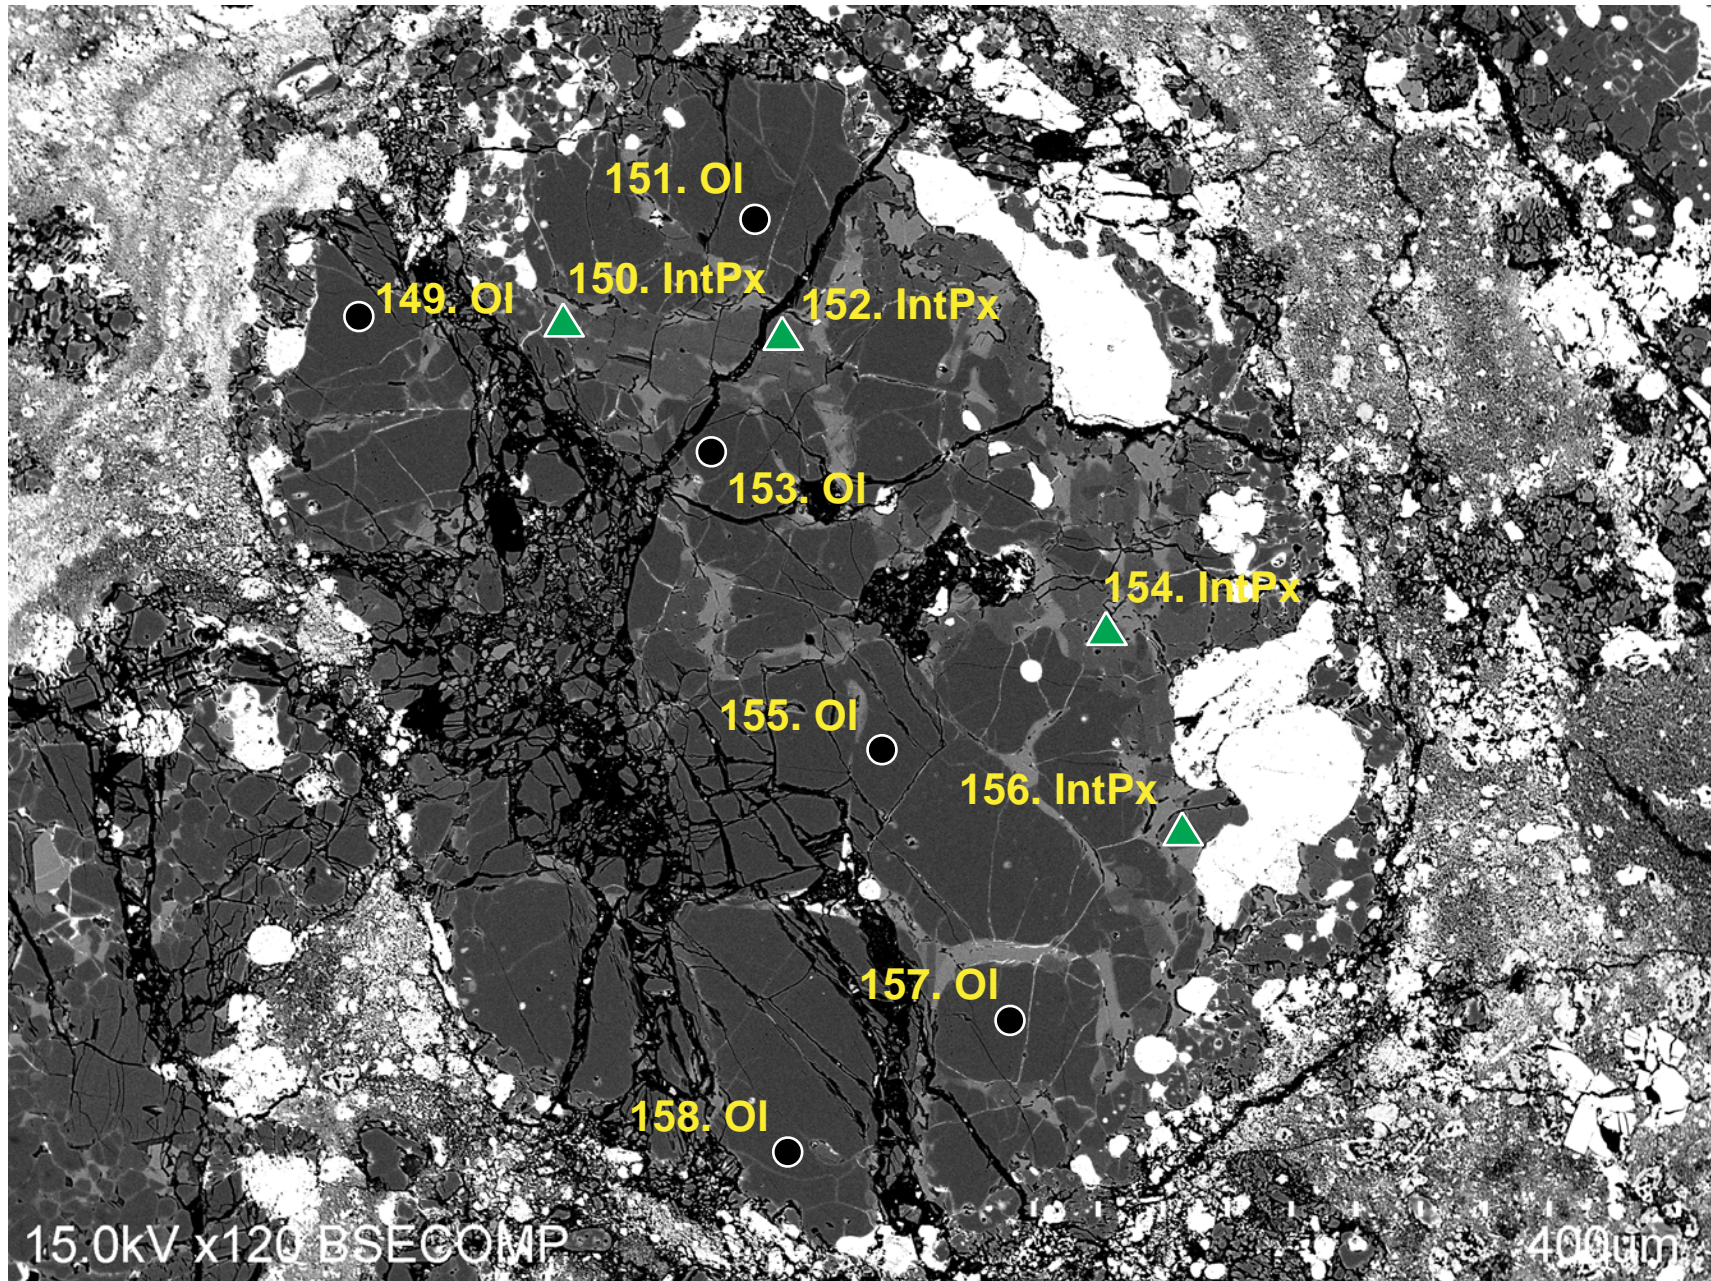



# #17

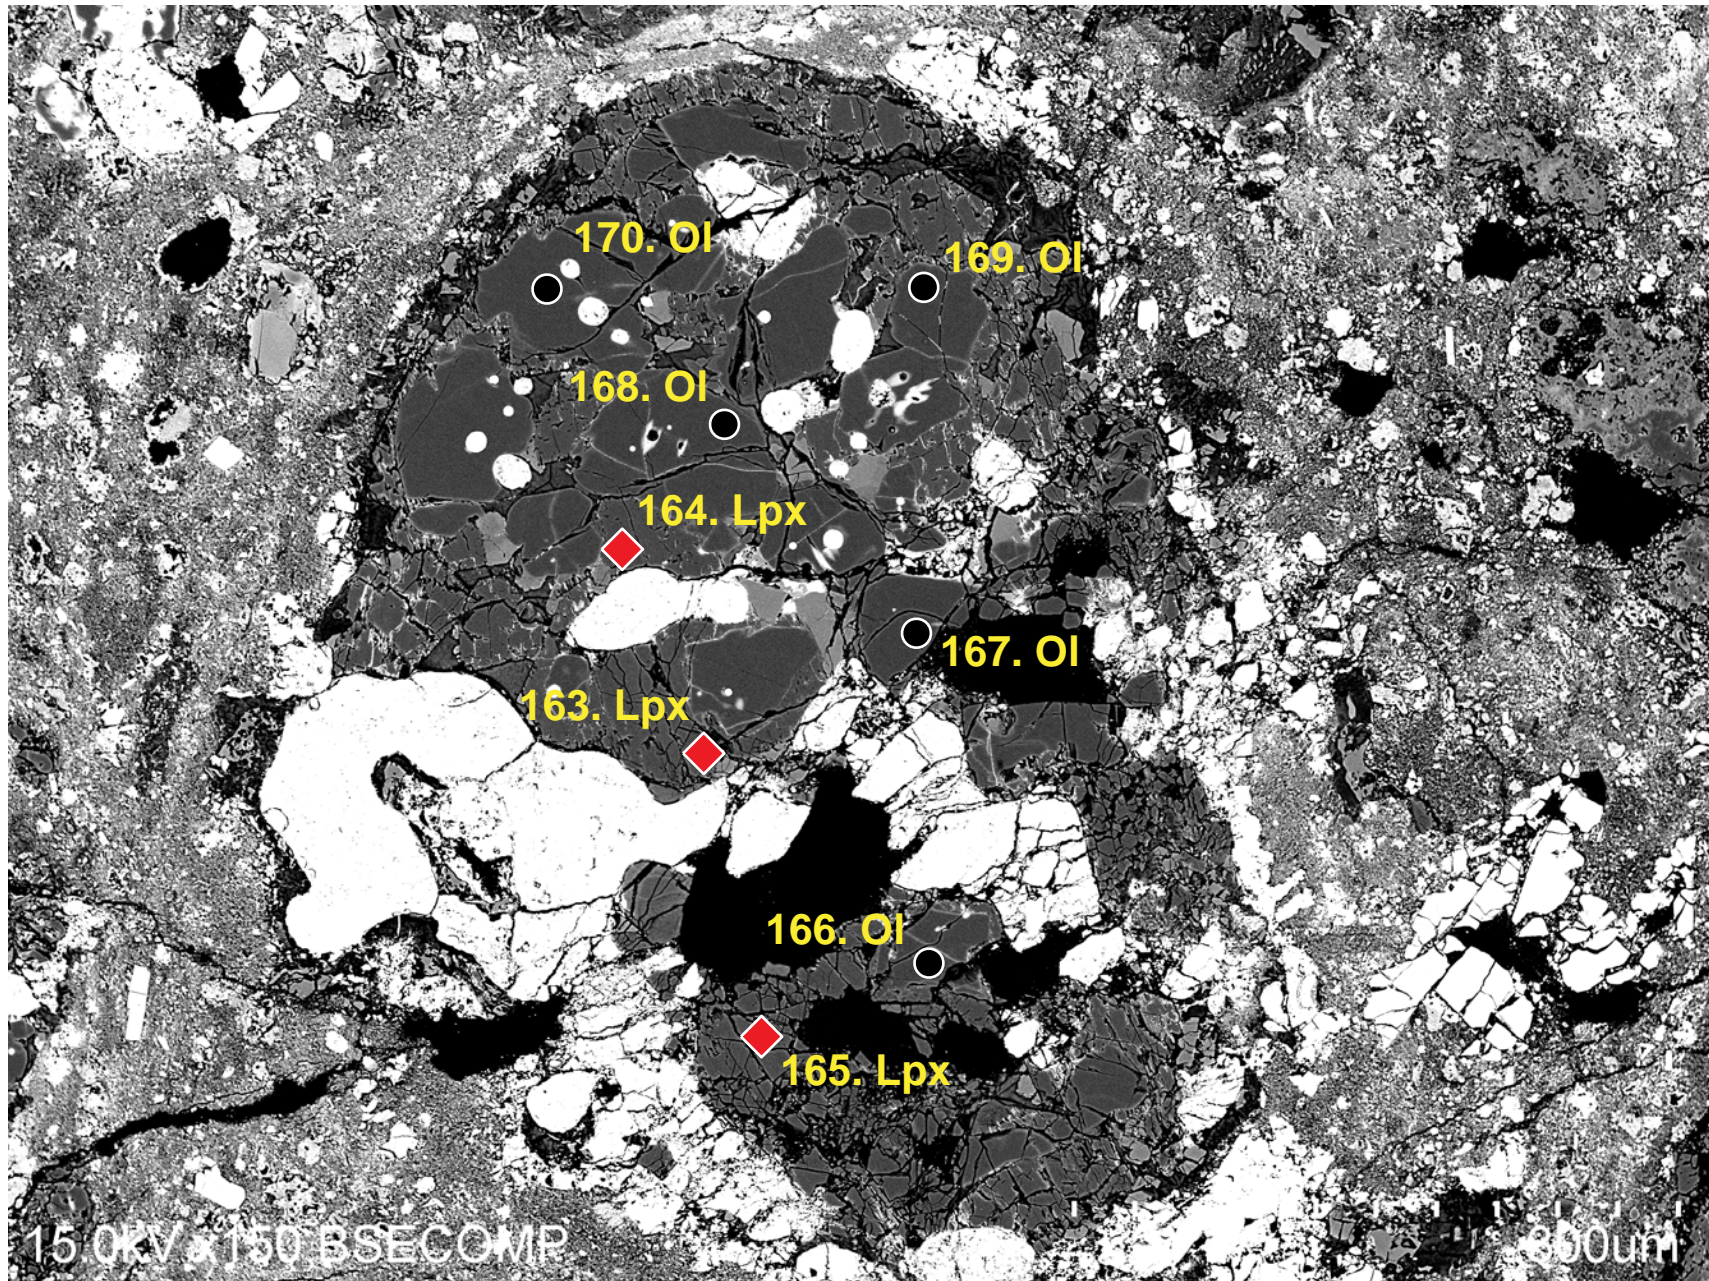



# #18

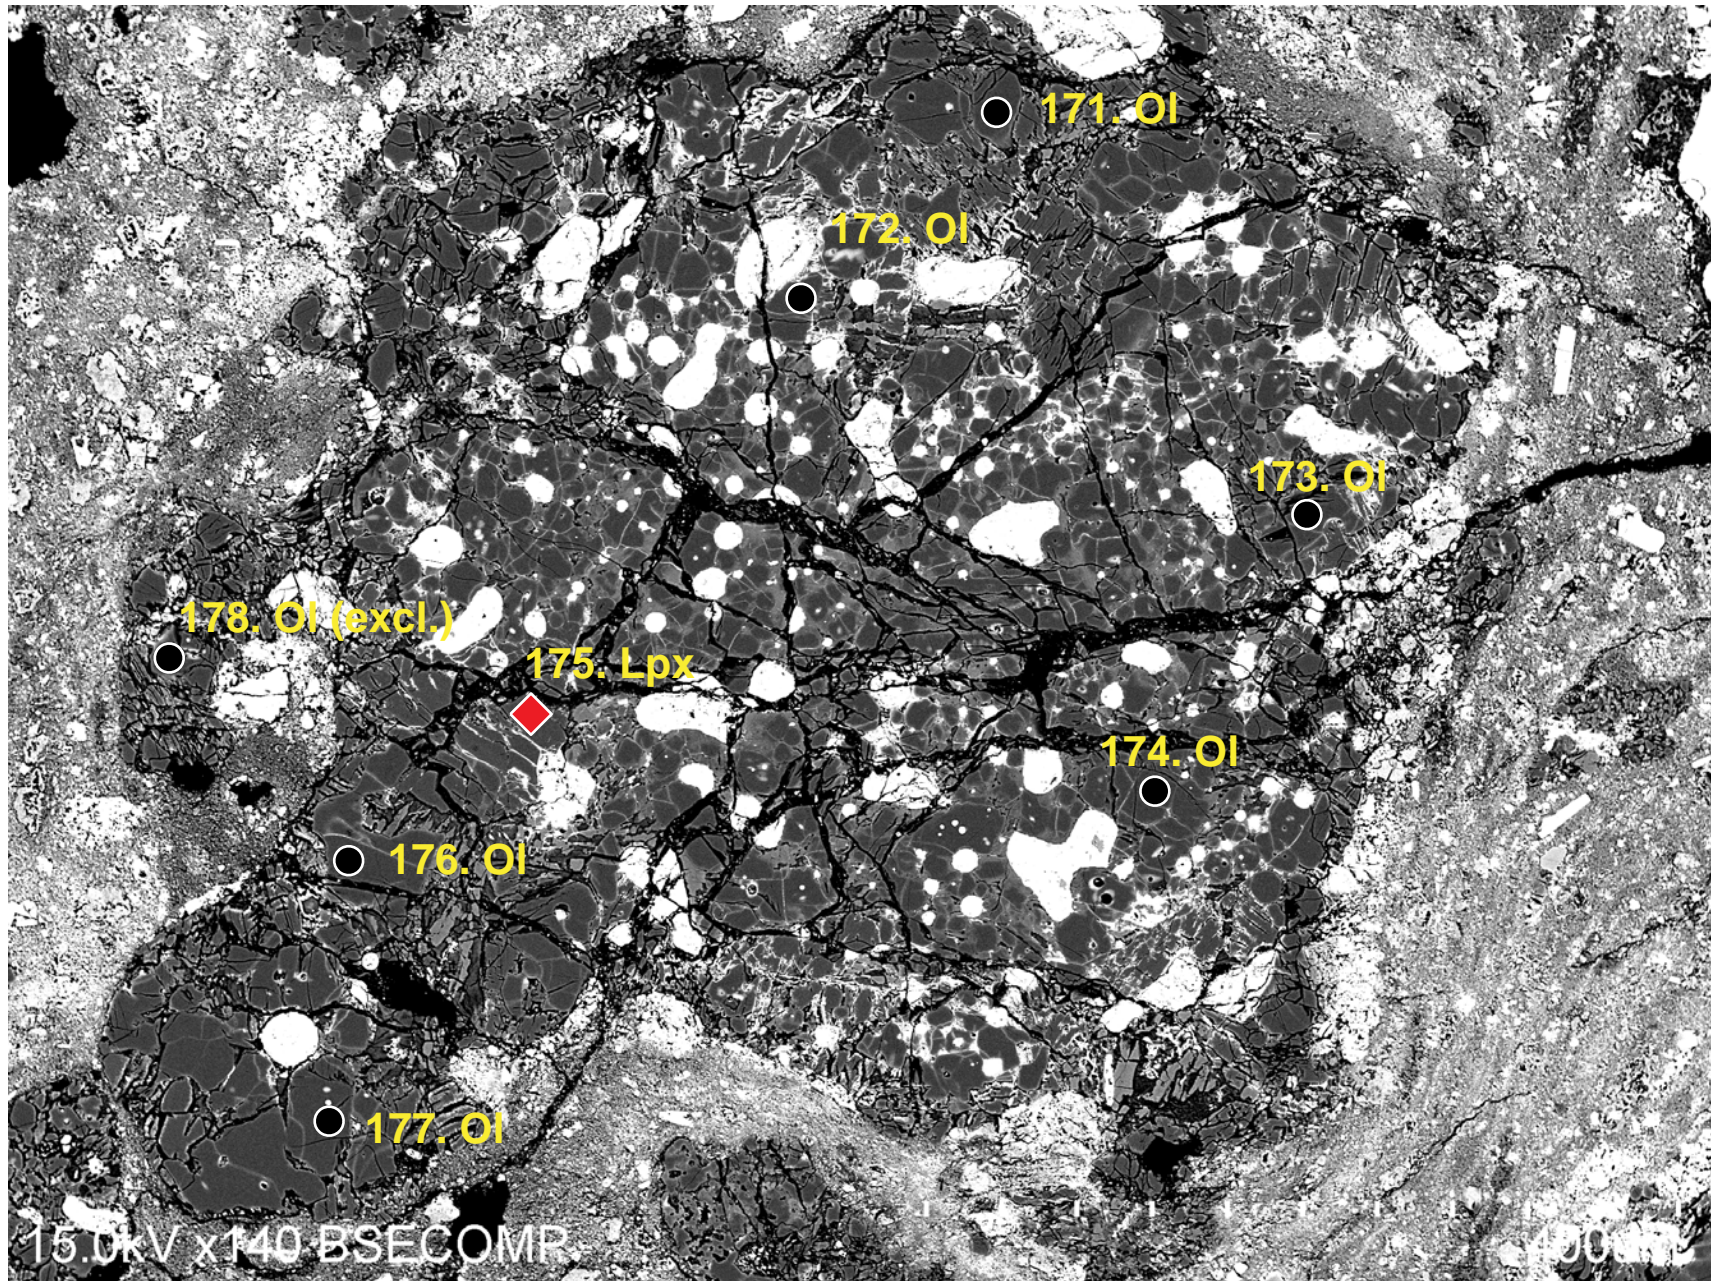



# #19

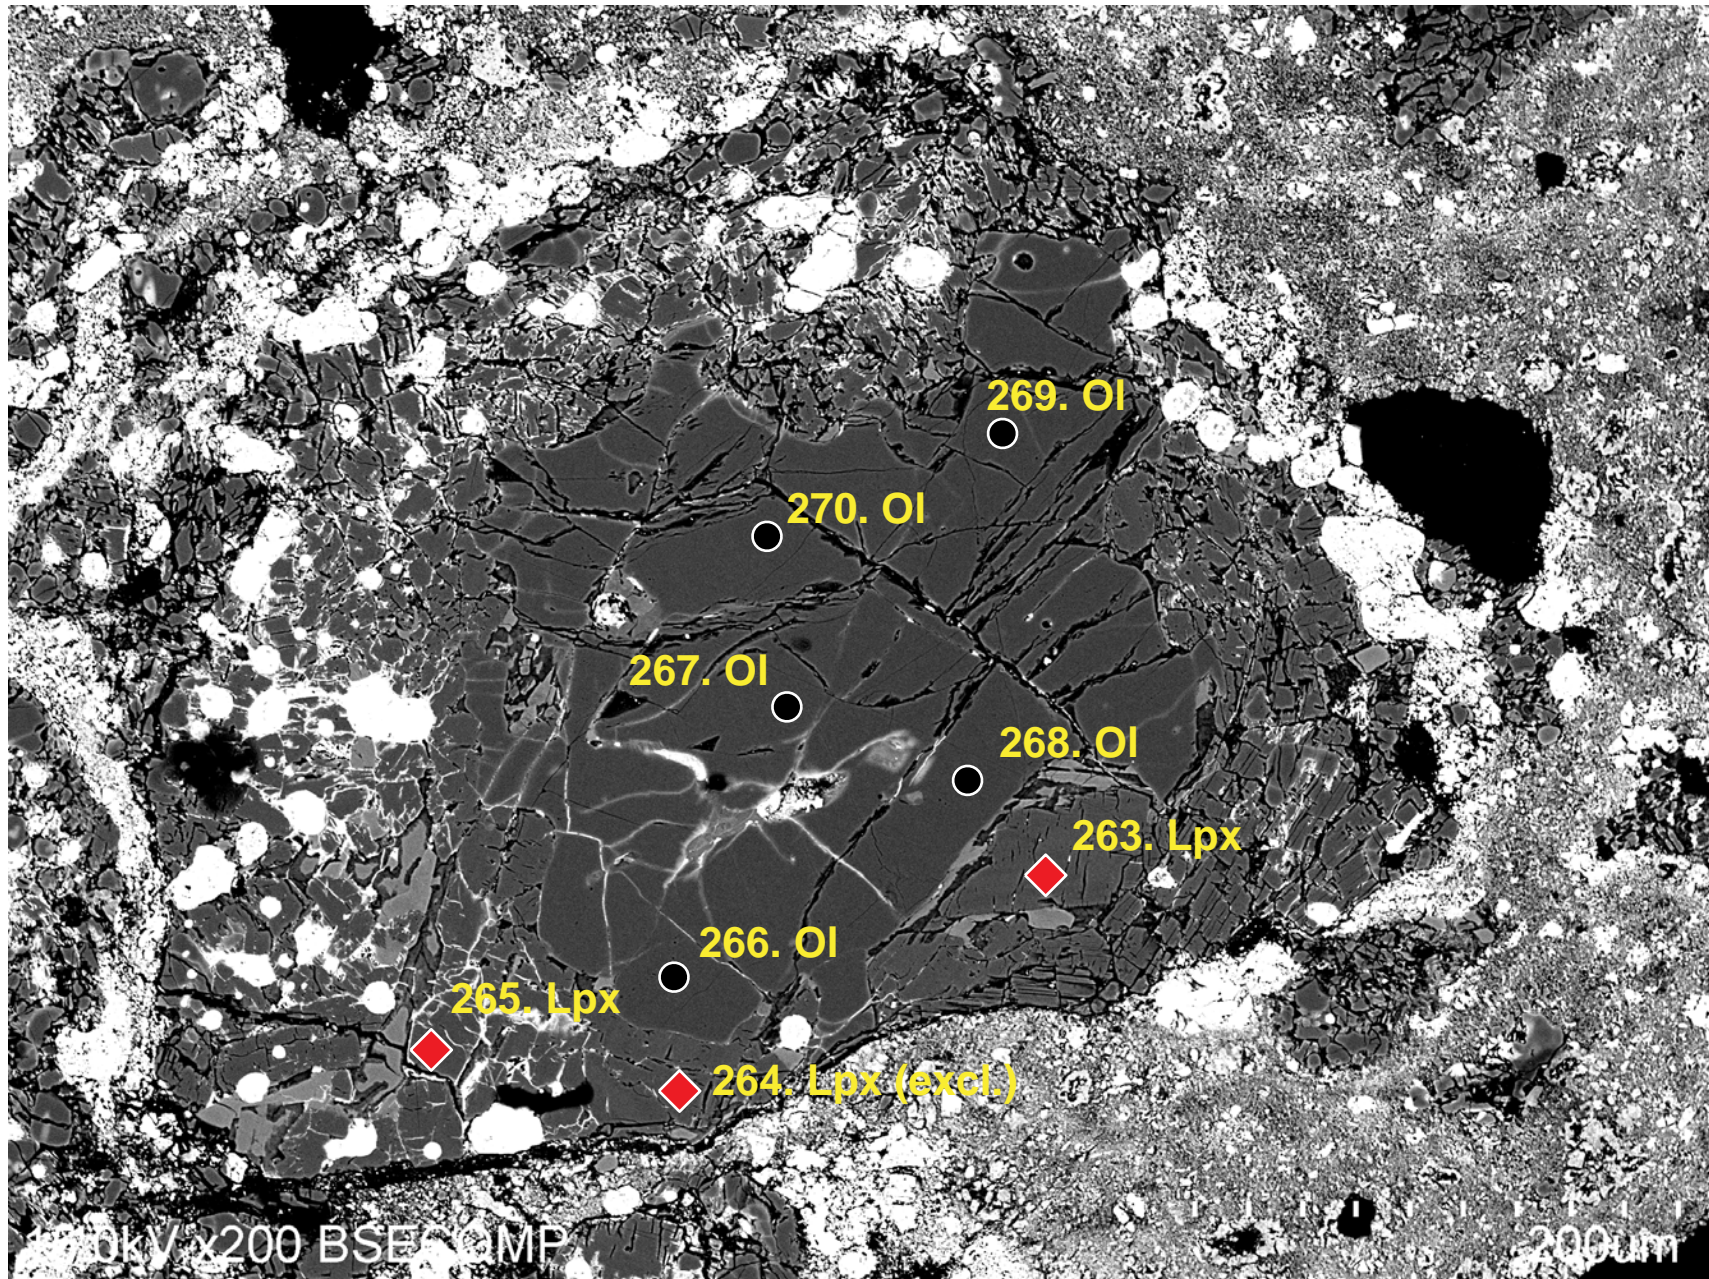



# #20

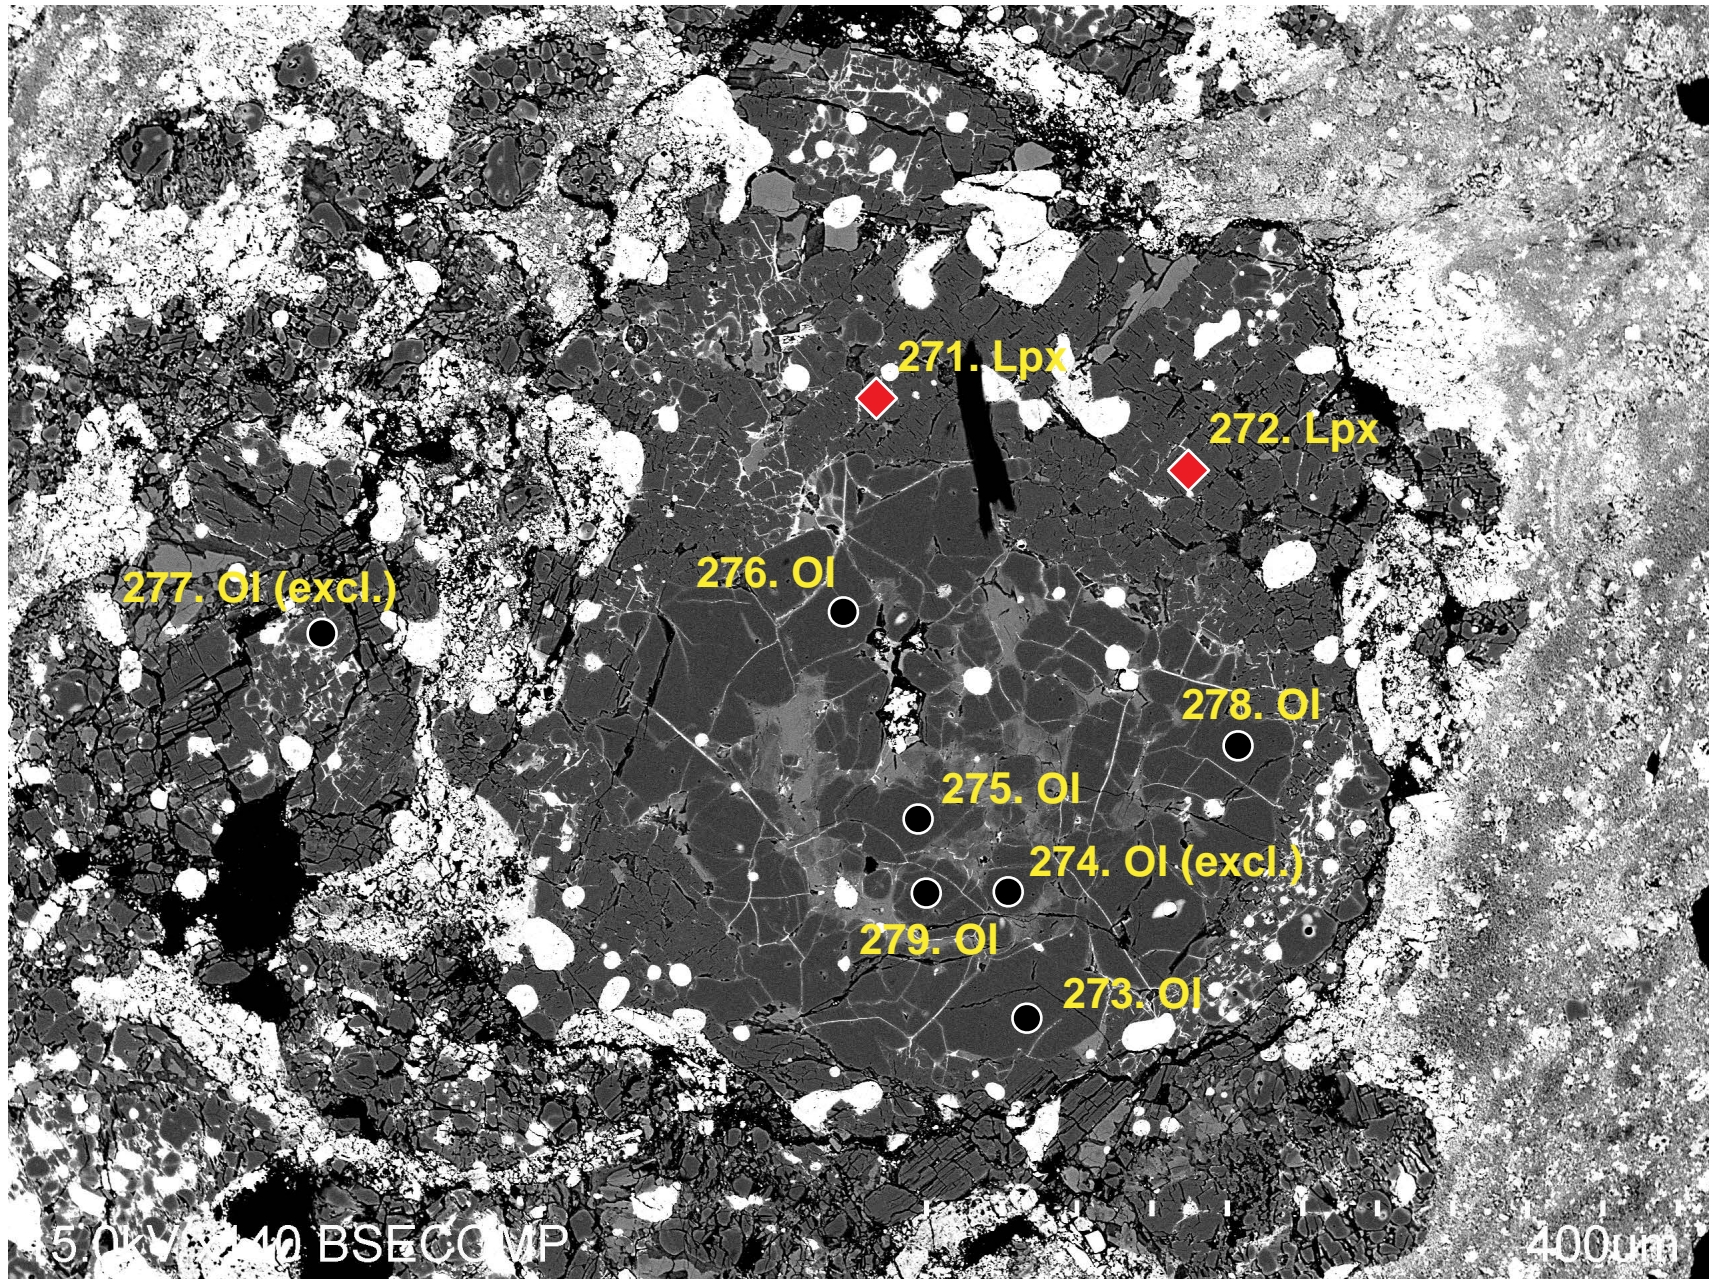



# #21

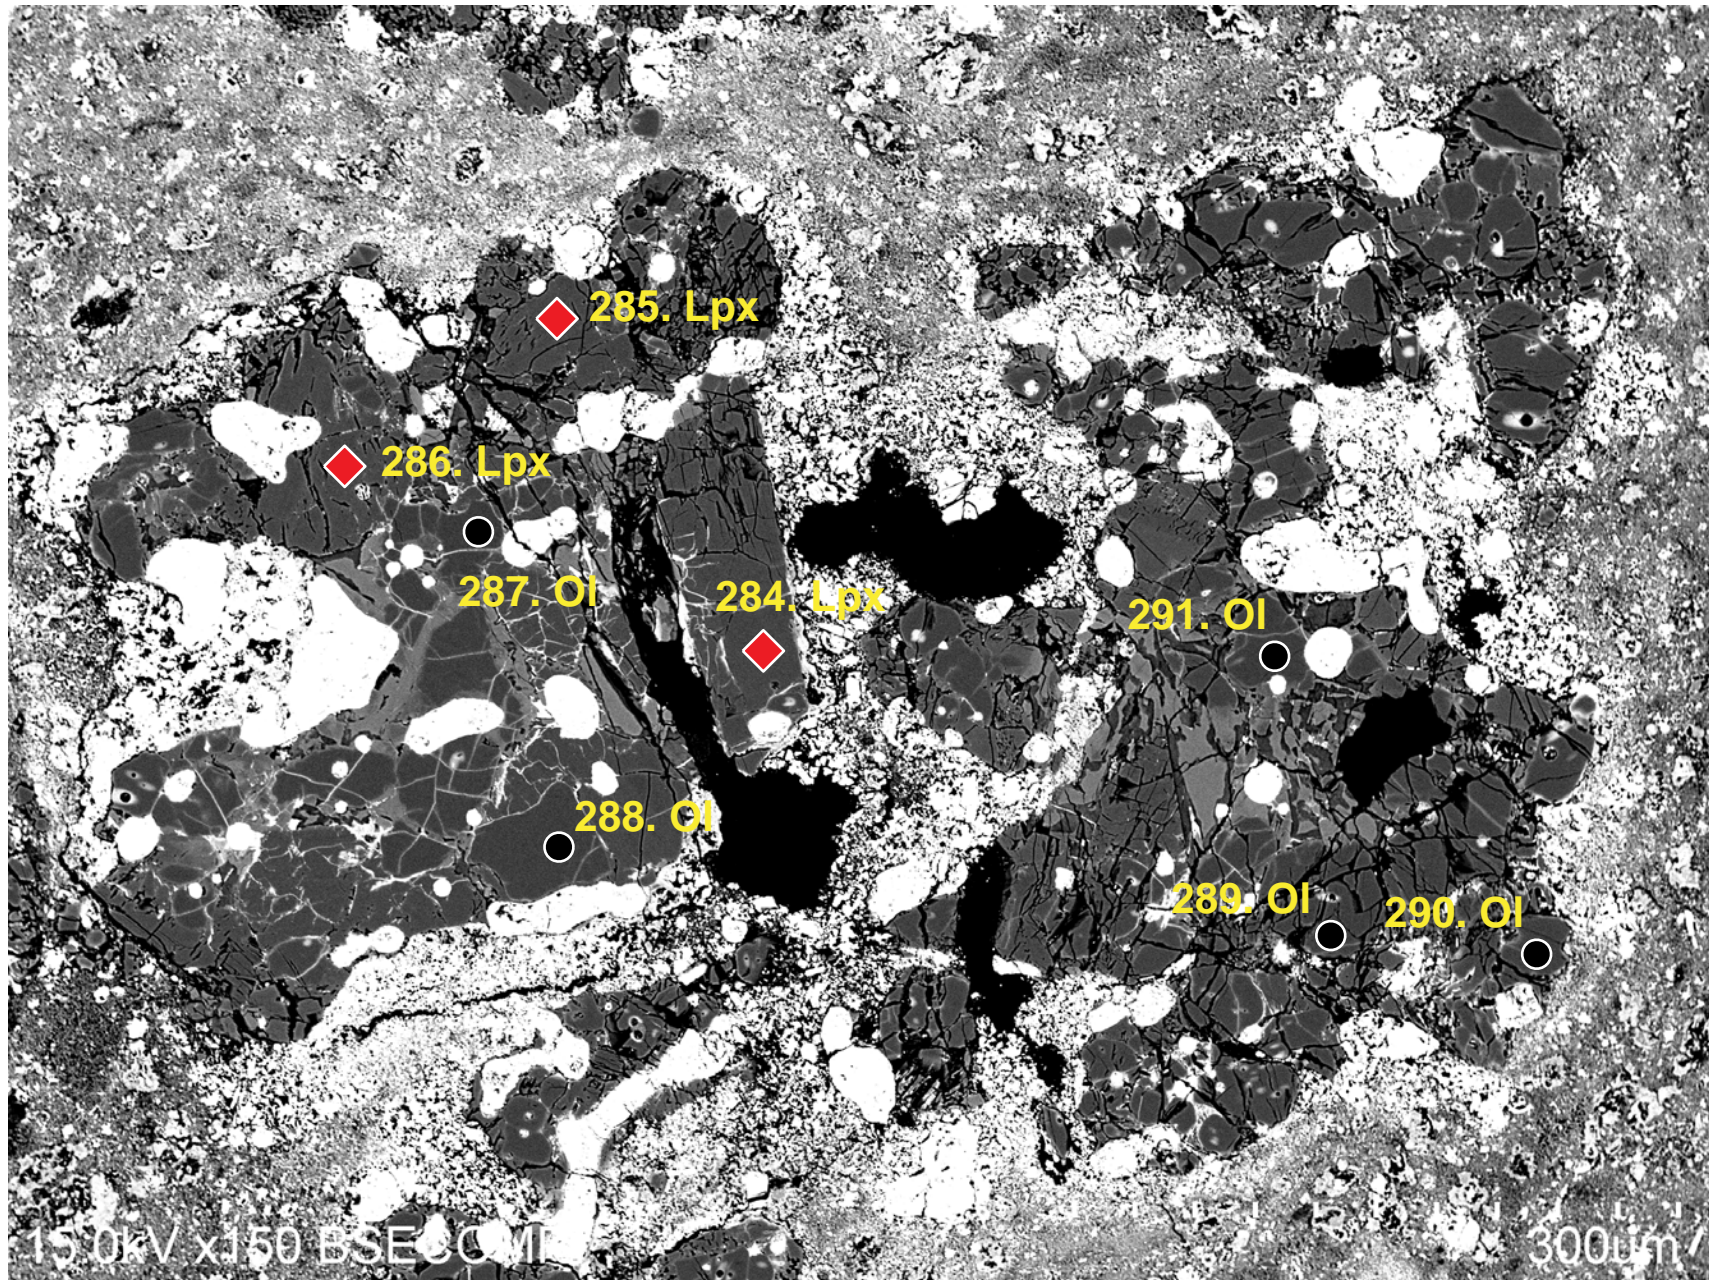



# #22

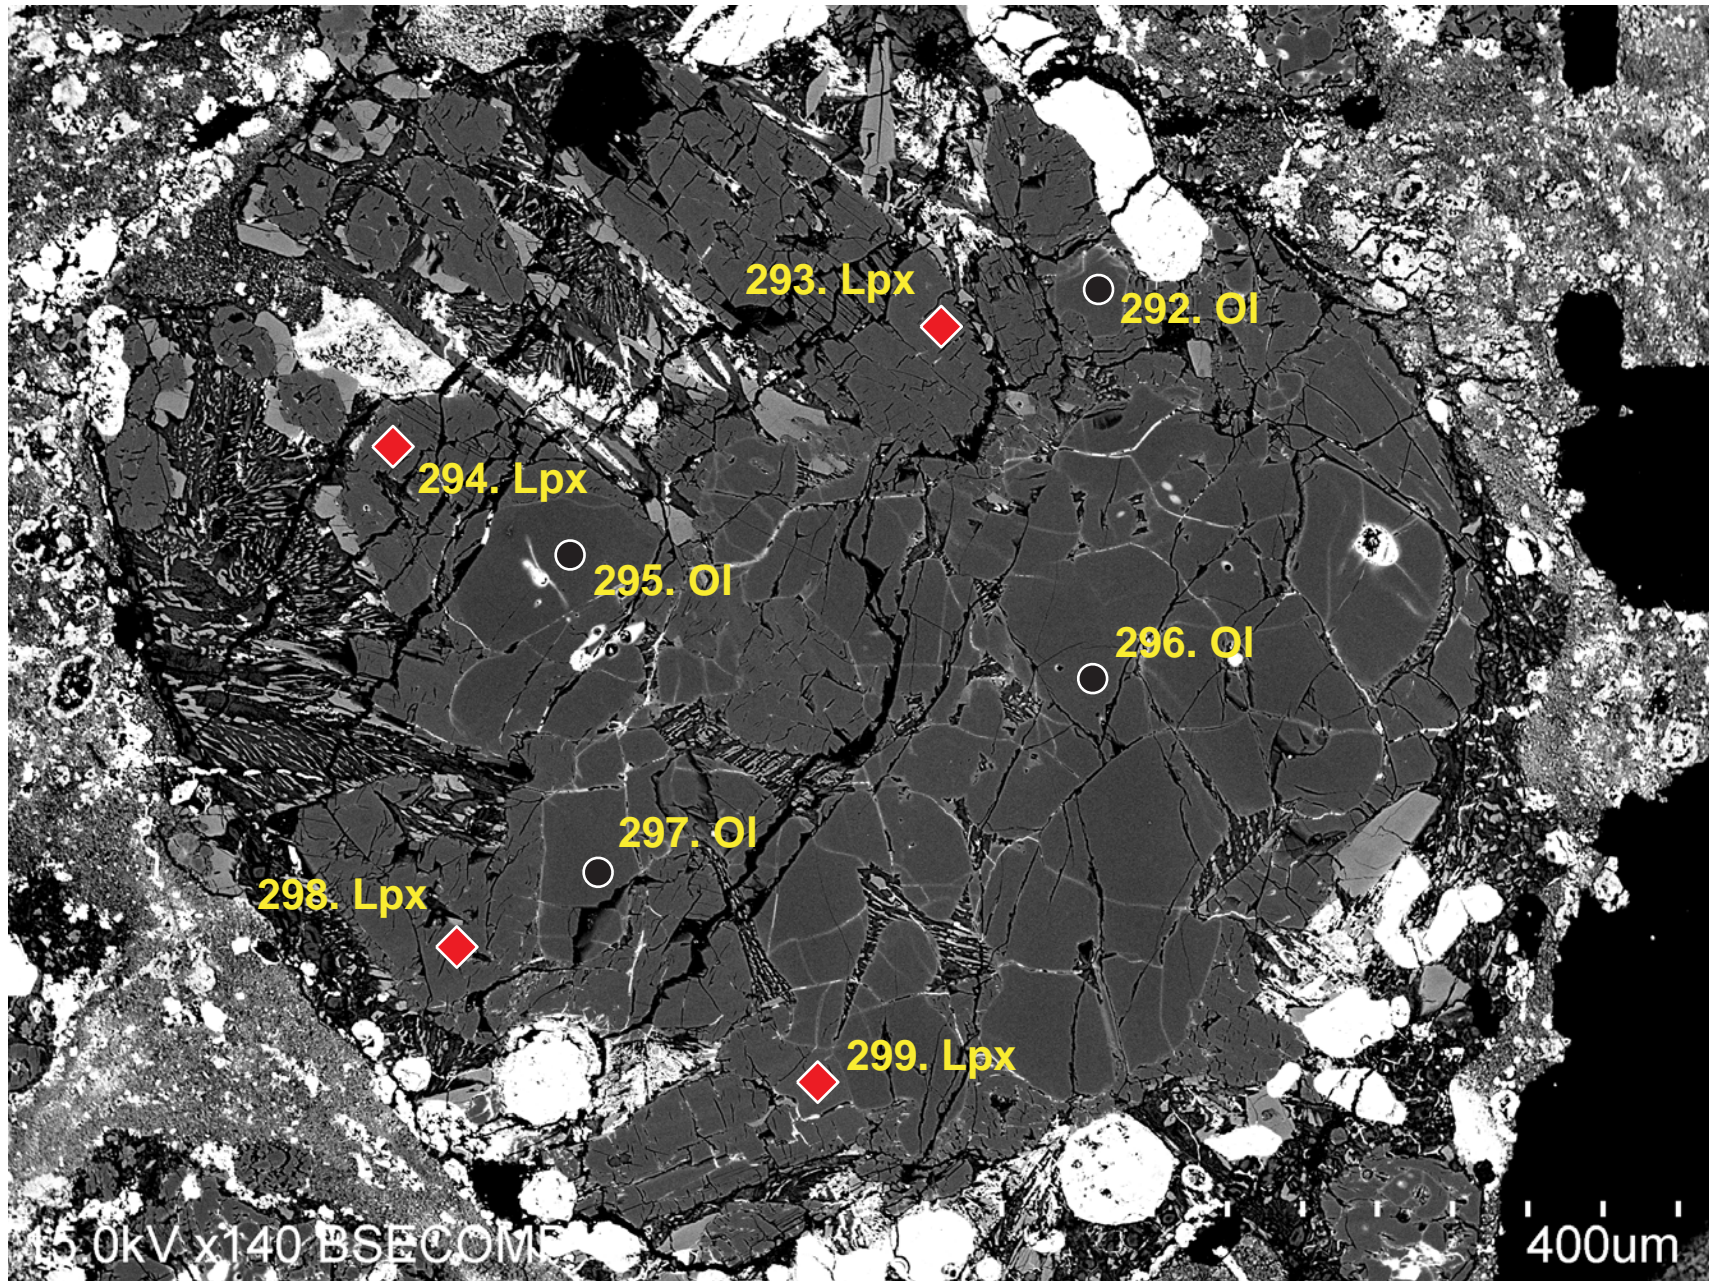



# #23

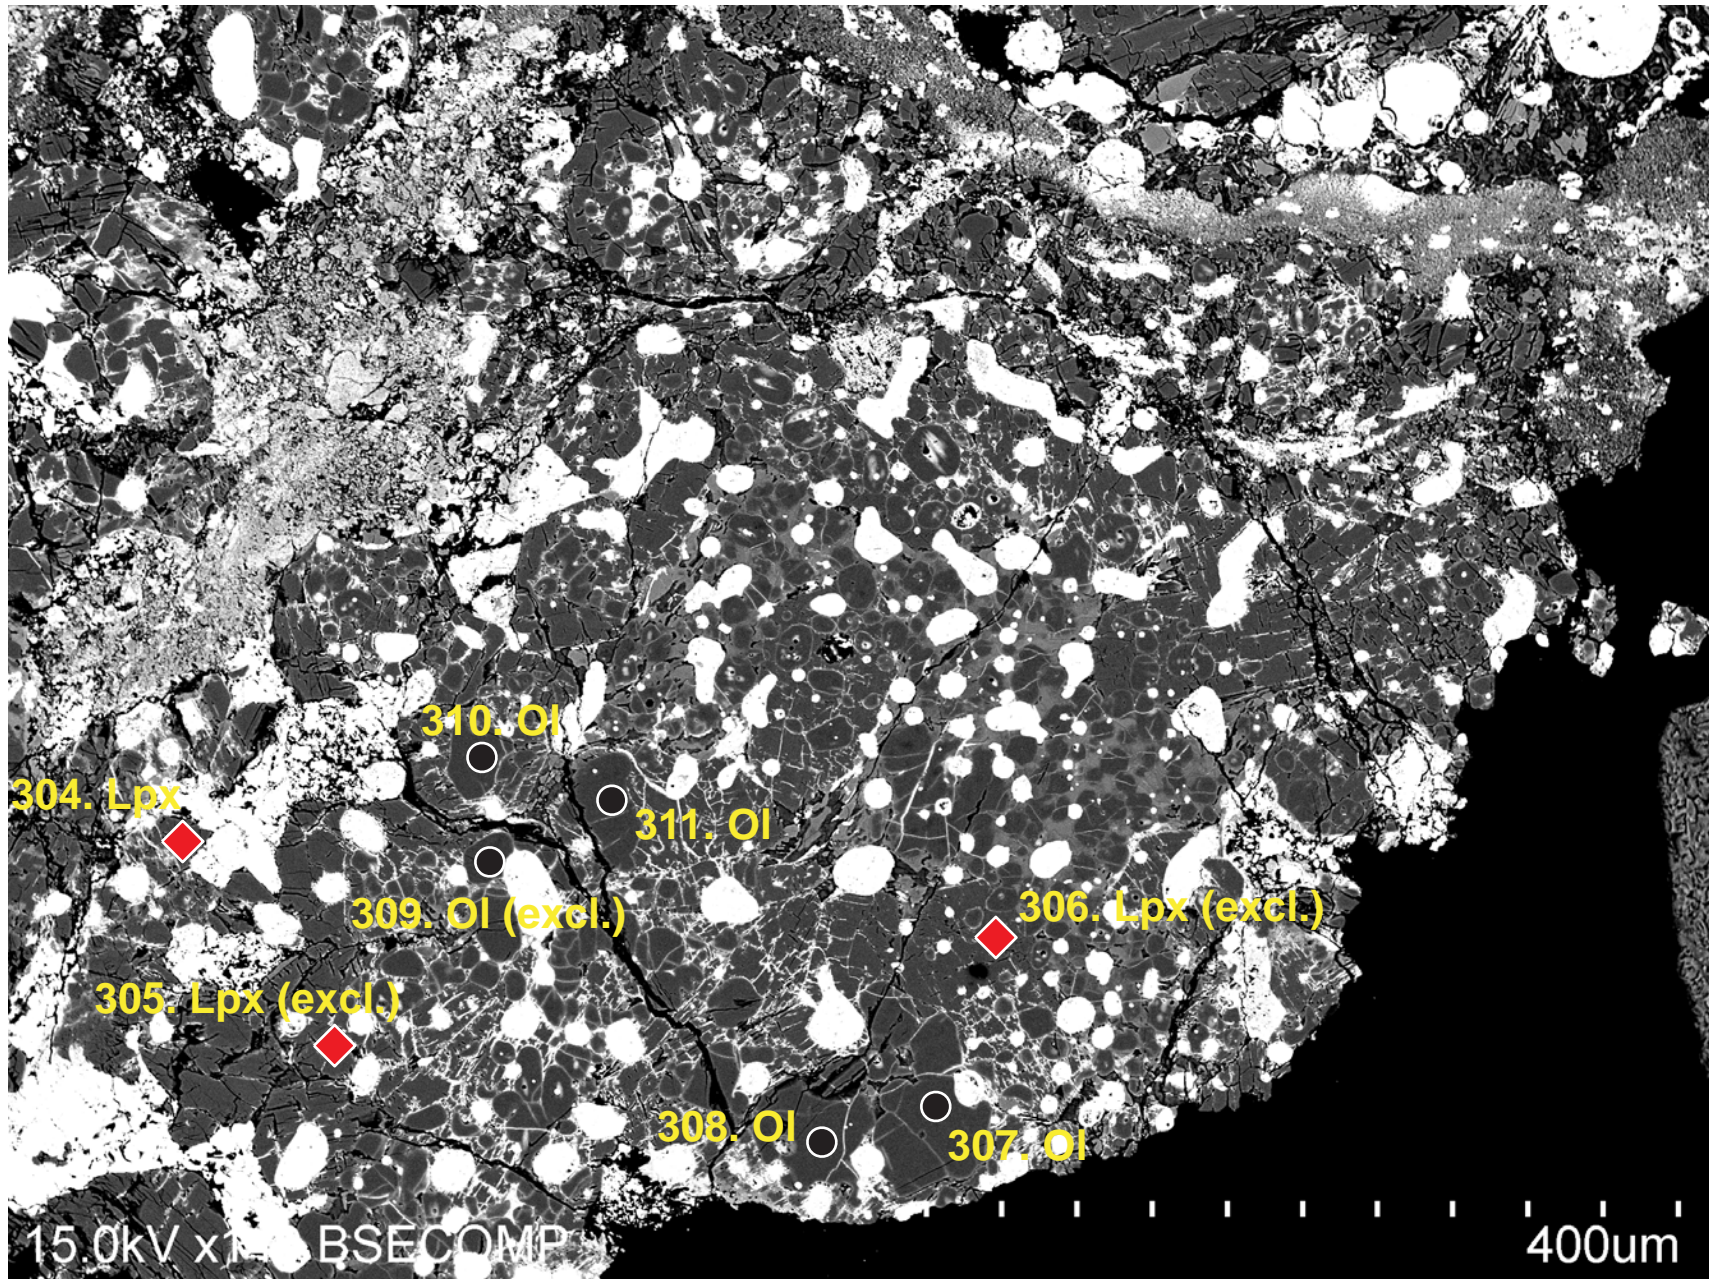



# #24

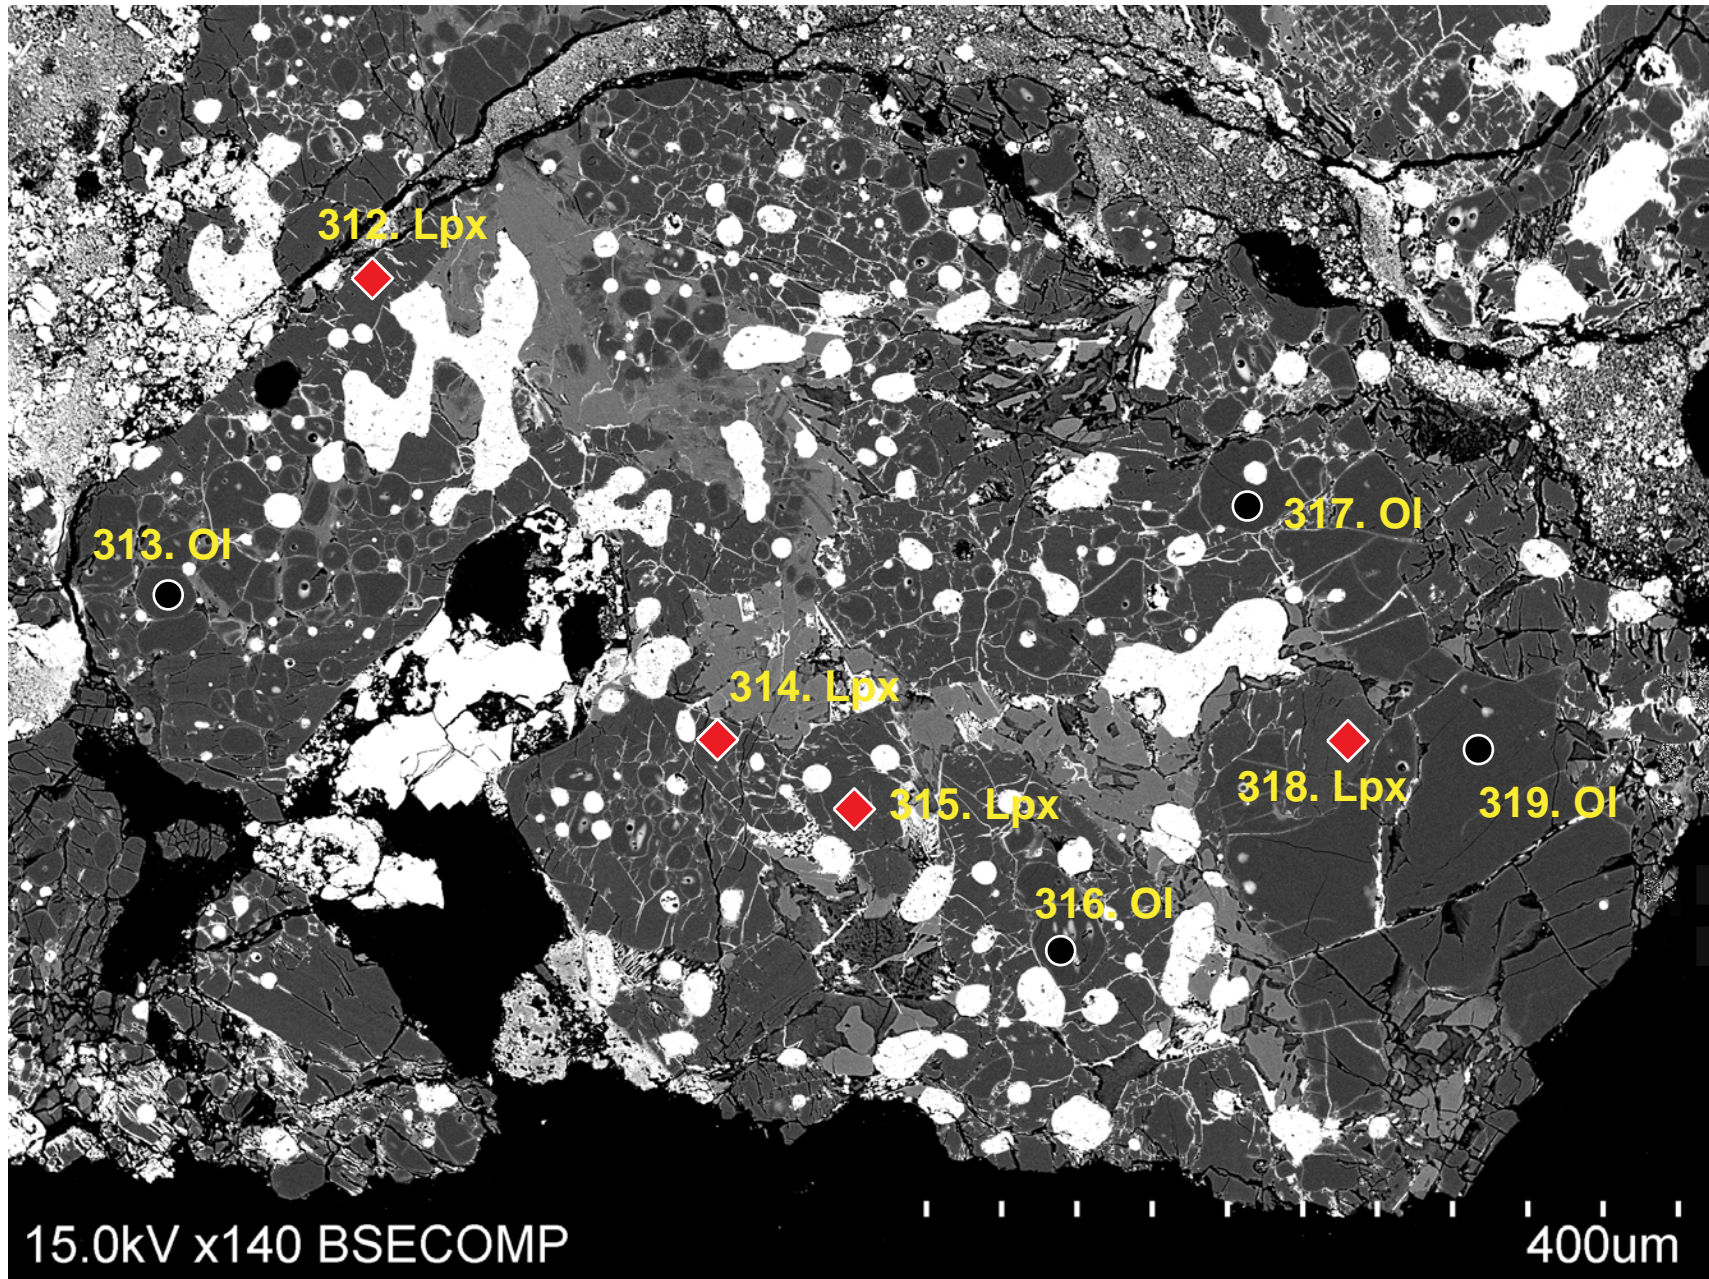



# #25

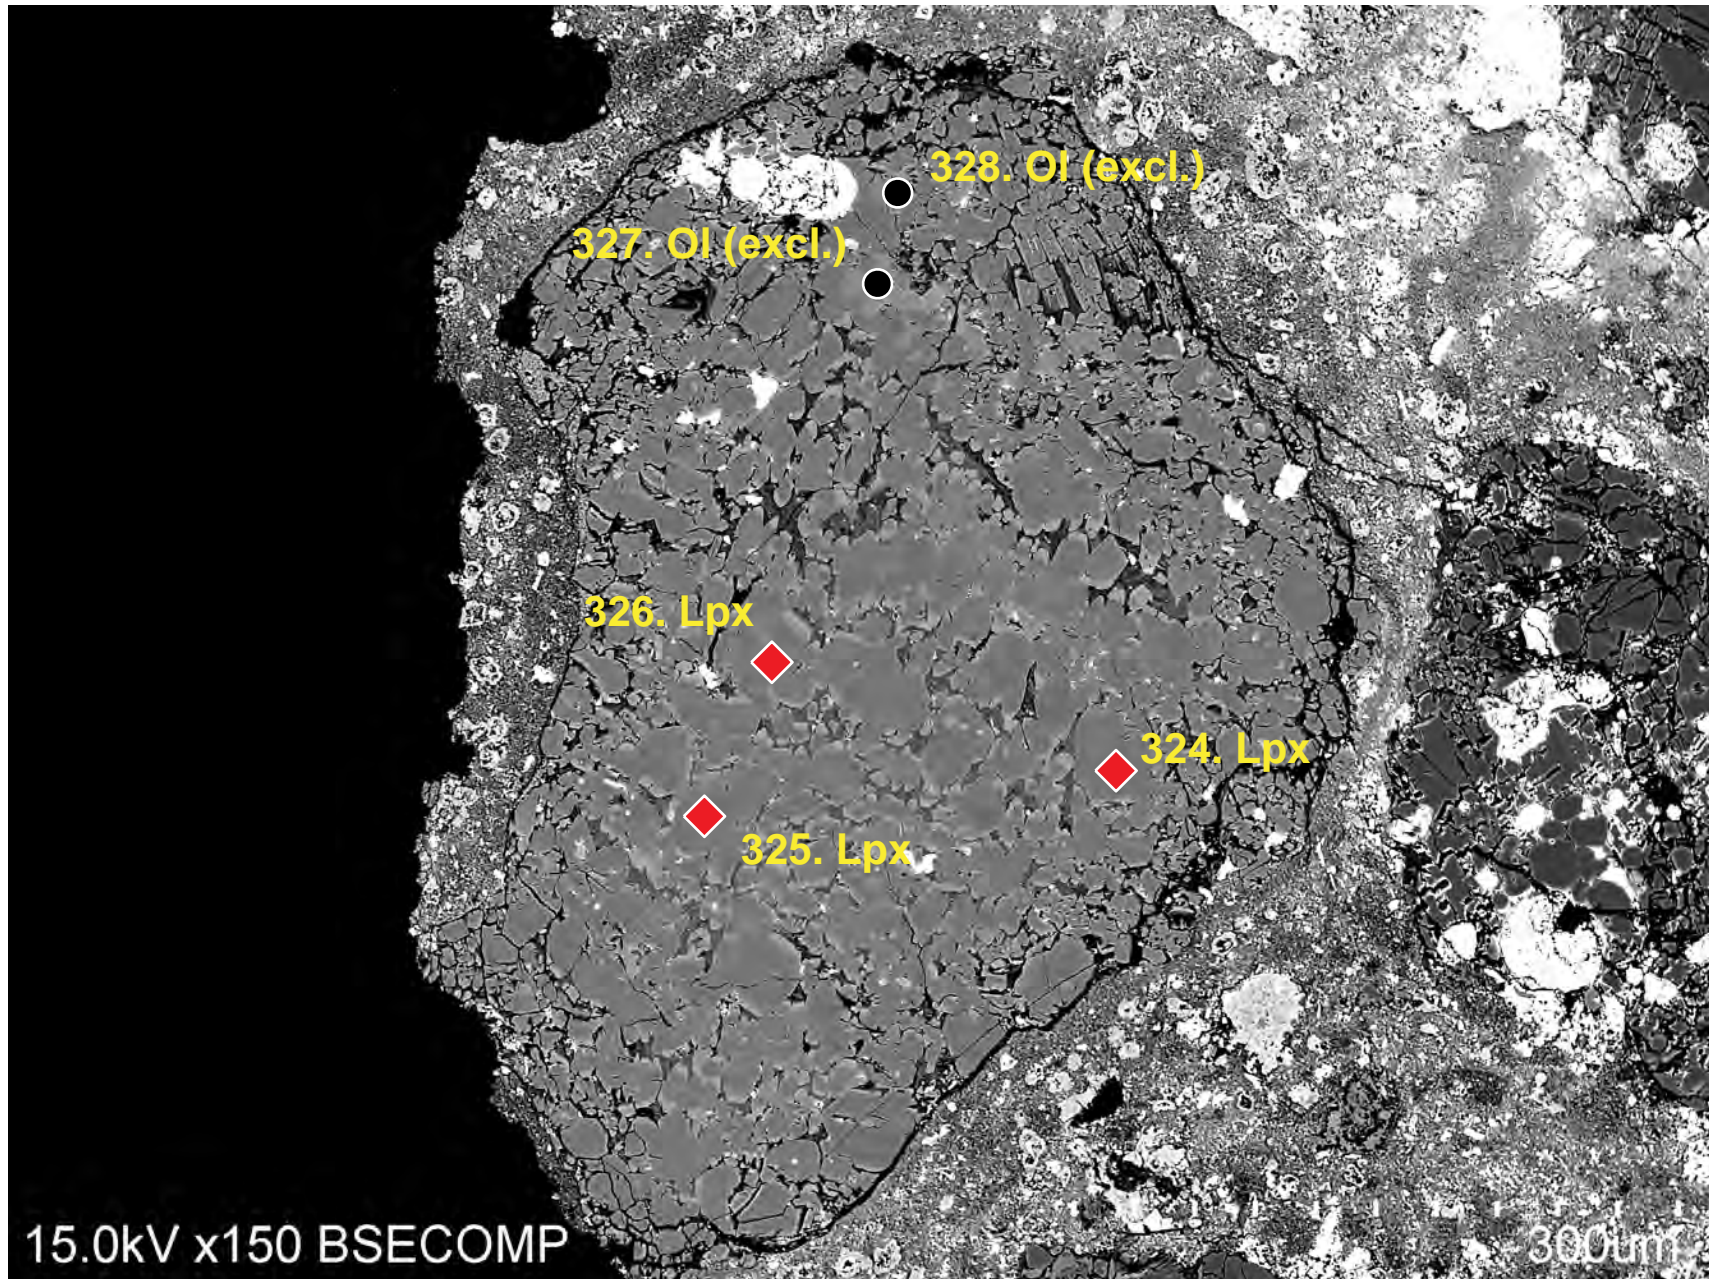



# #26

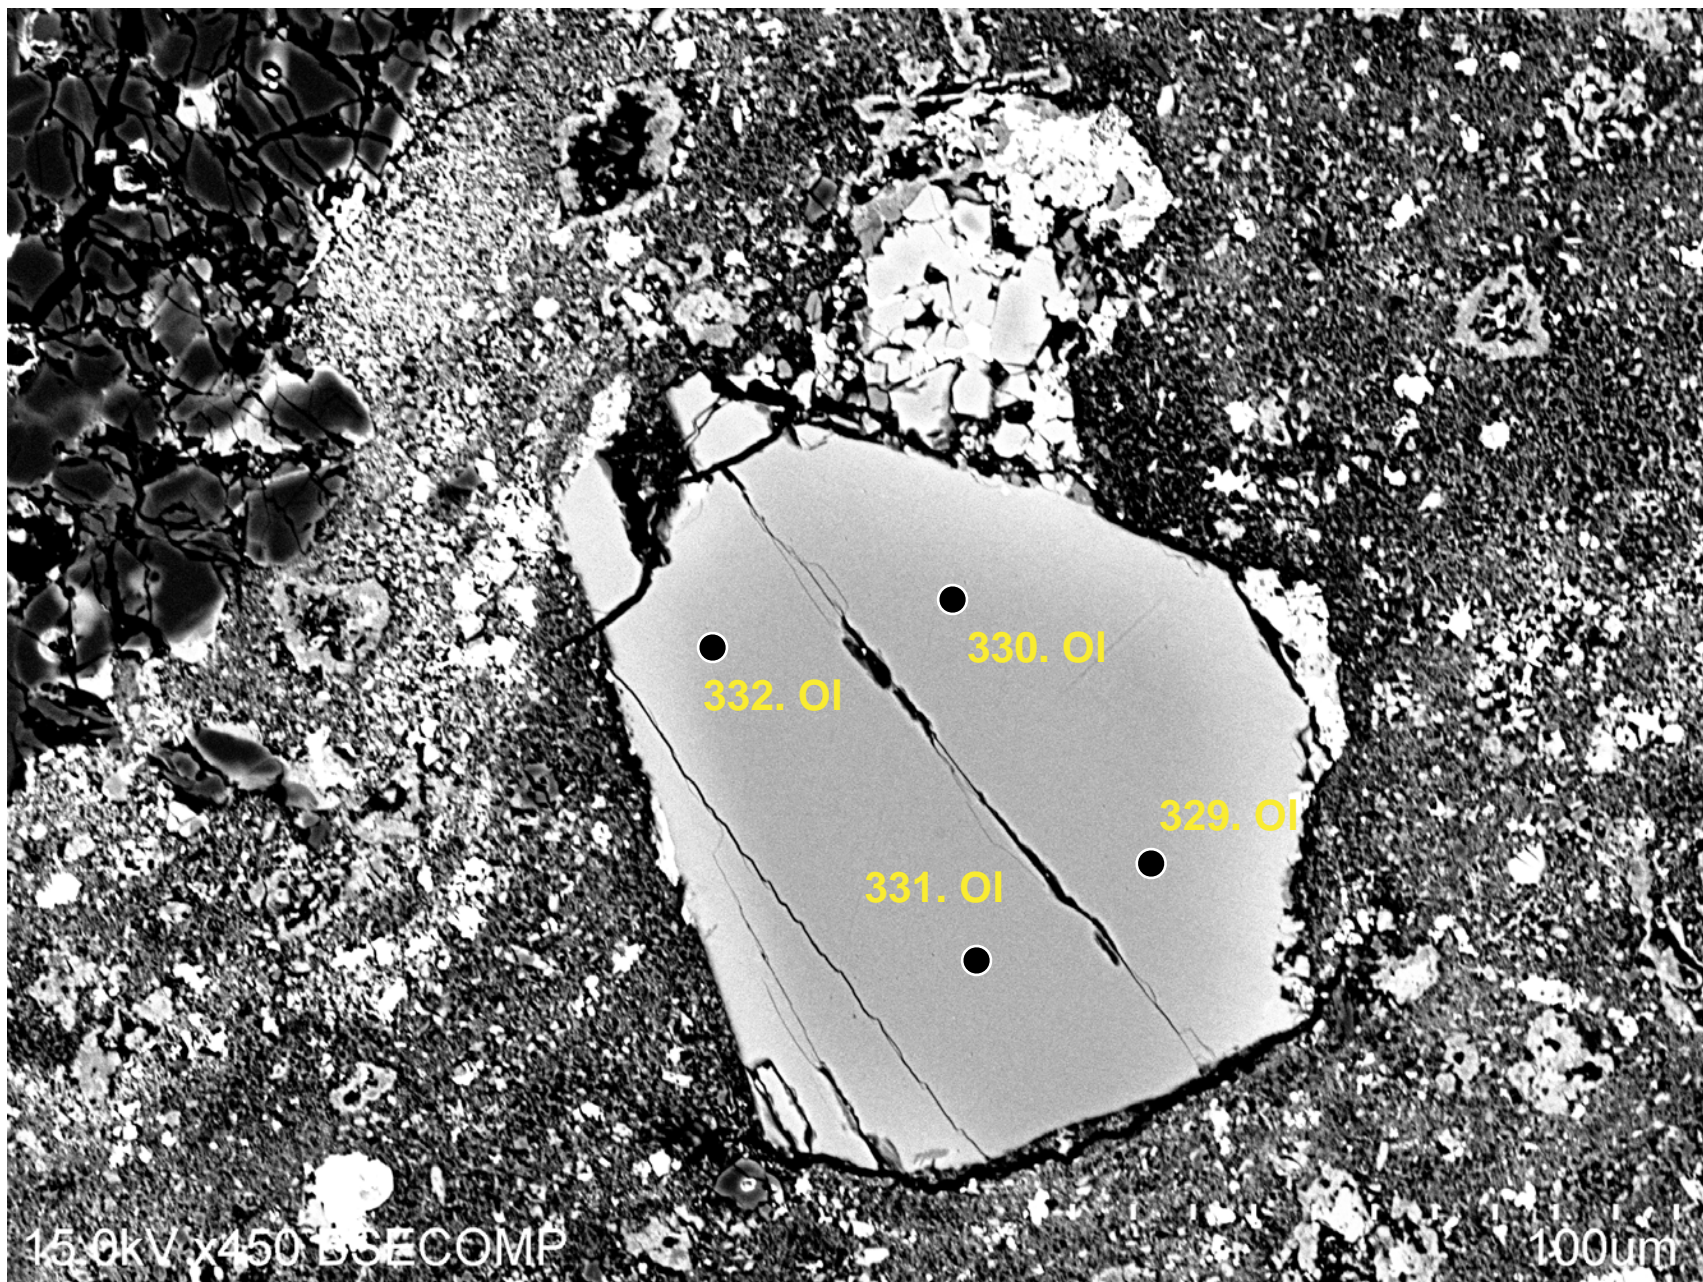

Supplement: NIHMS1006707-supplement-EA1.pdf [file NIHMS1006707-supplement-EA1.pdf]
