# Supplementary material
Source: PubMed Central journal article supplement (PMC6350813)

Hertwig et al. 2017: Formation of chondrules in a moderately high dust enriched disk:  
evidence from oxygen isotopes of chondrules from the Kaba CV3 chondrite

## **EA2: BSE images of SIMS pits**

#No.: Chondrule number

excl.: Analysis excluded because of pit imperfections

Ol: Olivine; Lpx: low-Ca pyroxene; IntPx: intermediate pyroxene



# #1

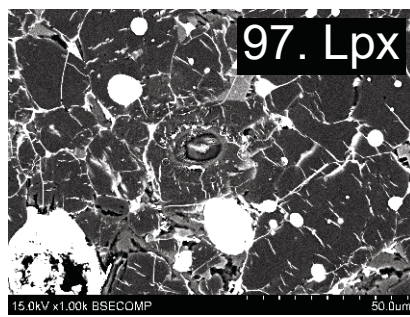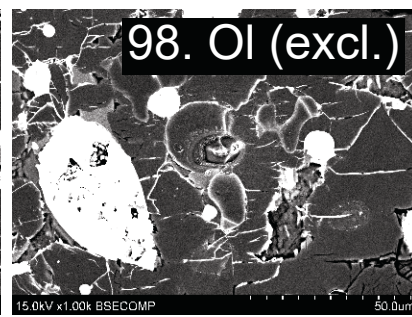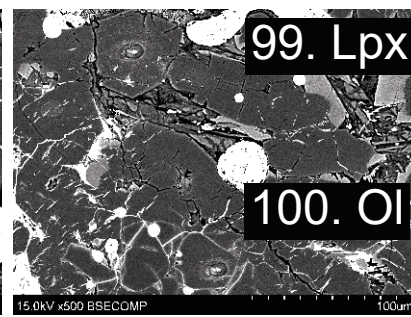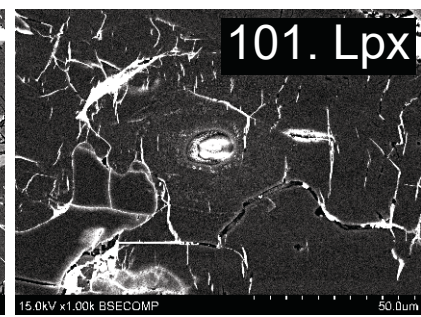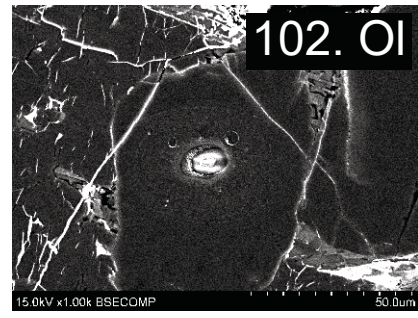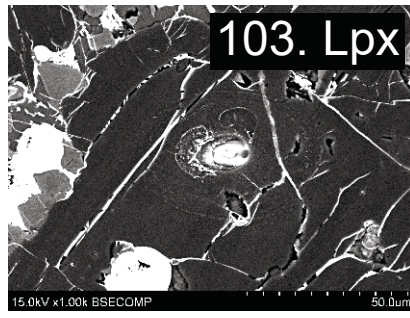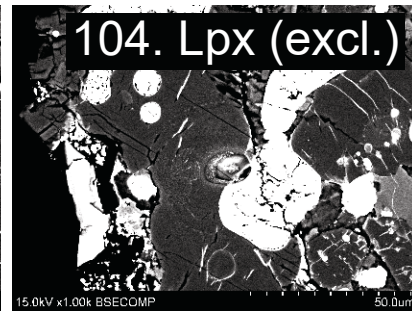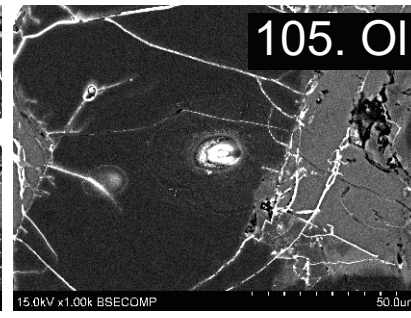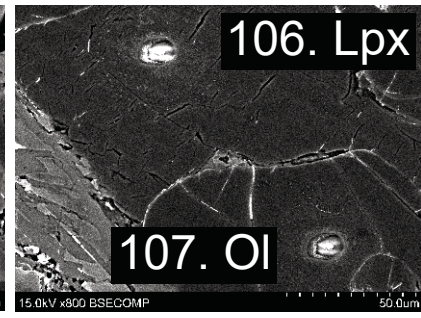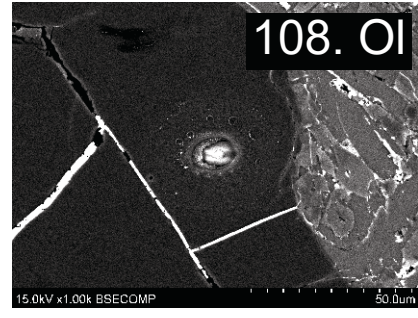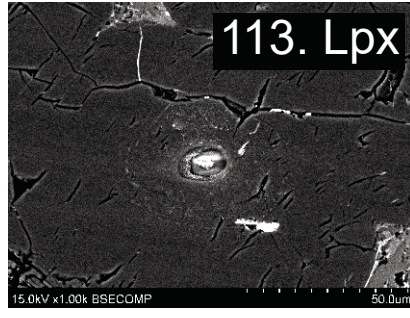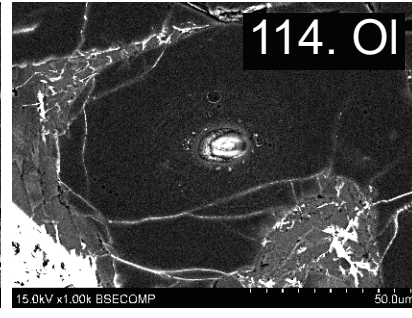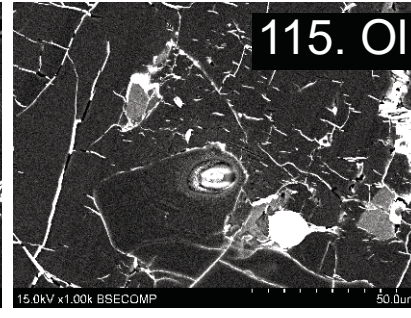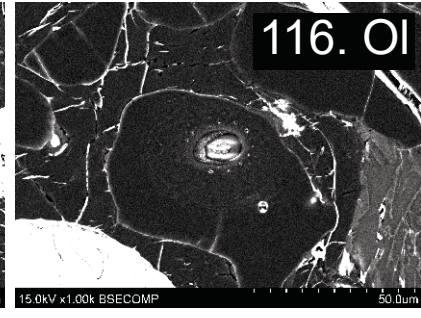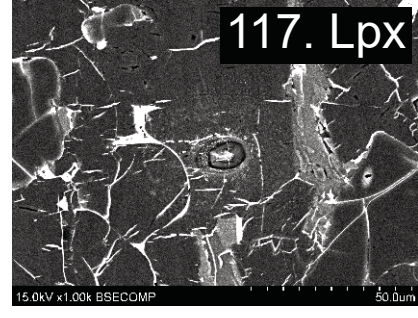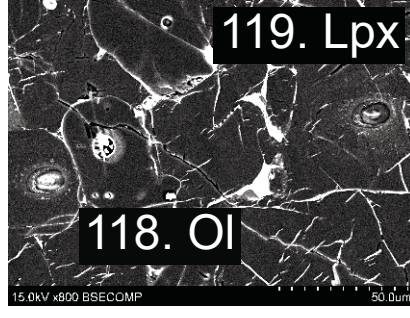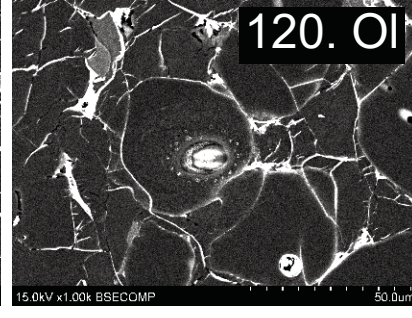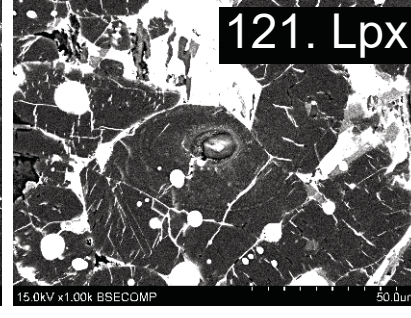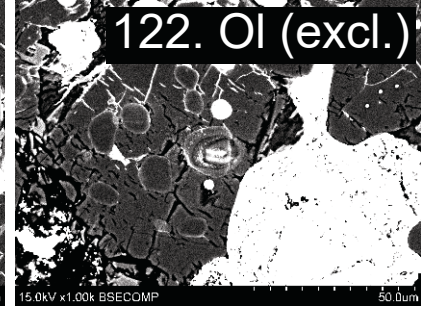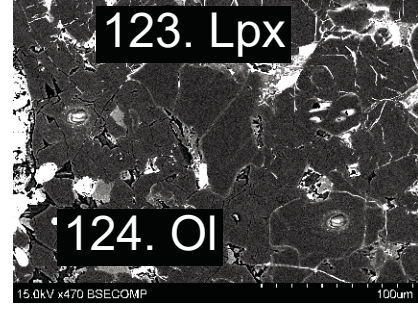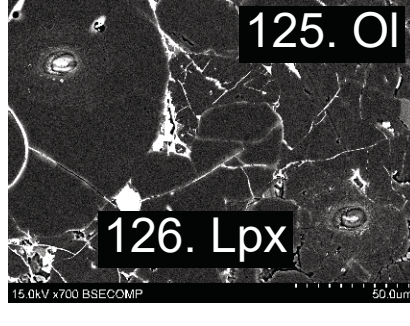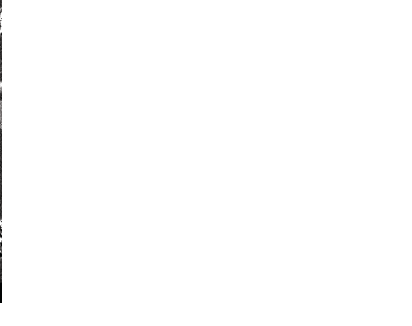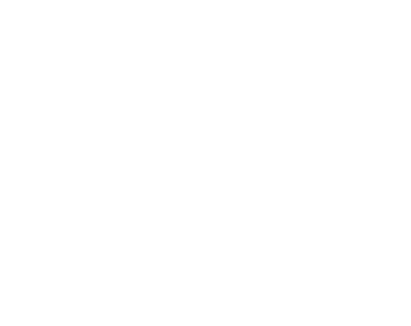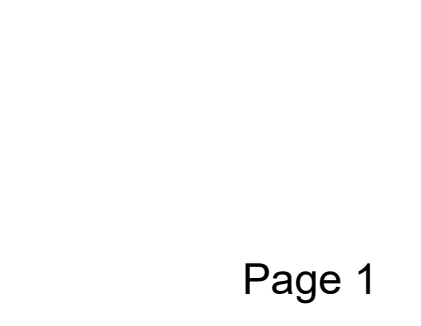



# #2

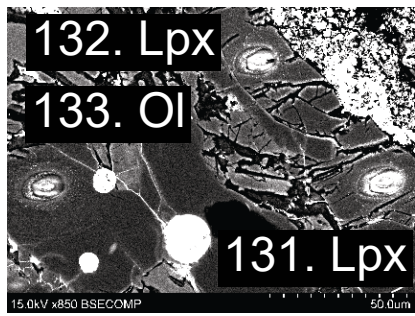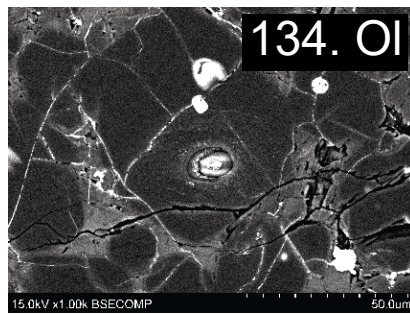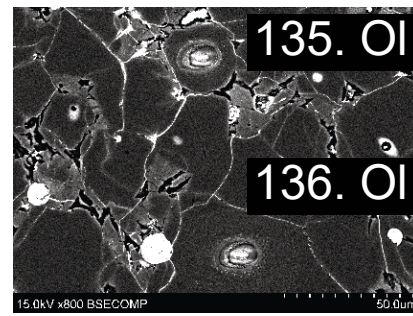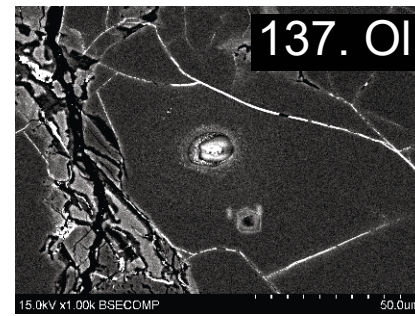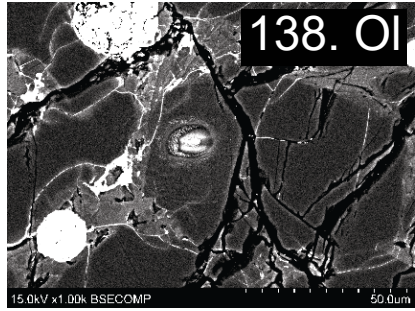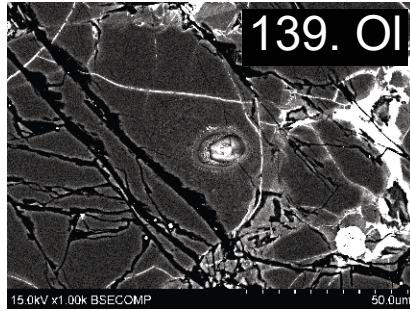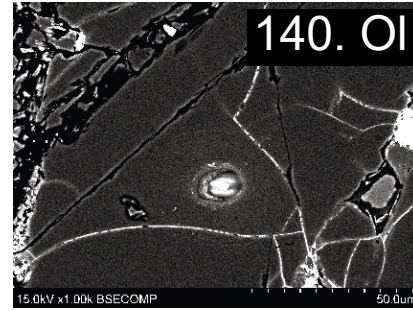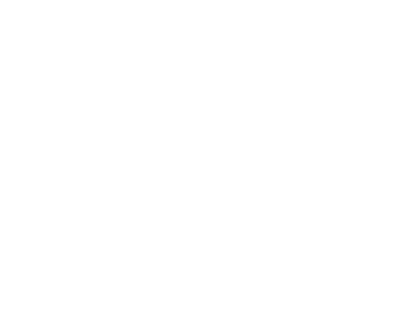

# #3

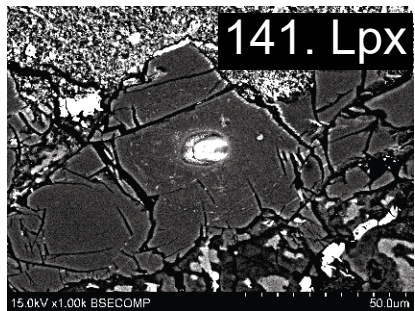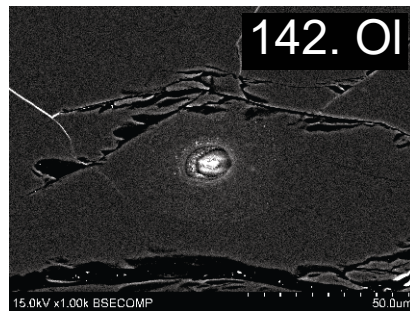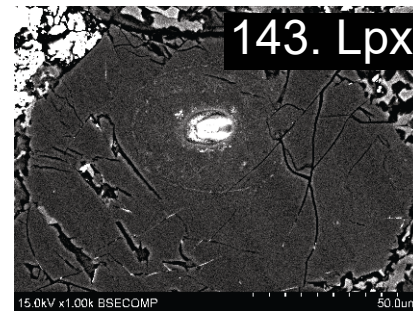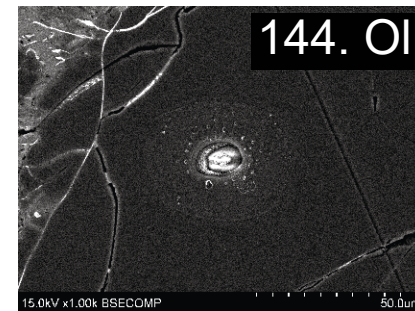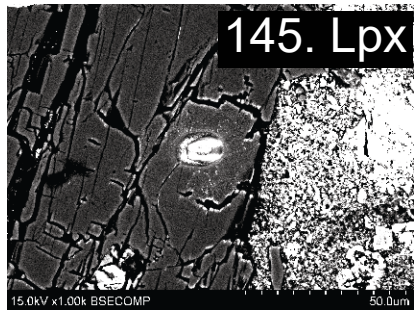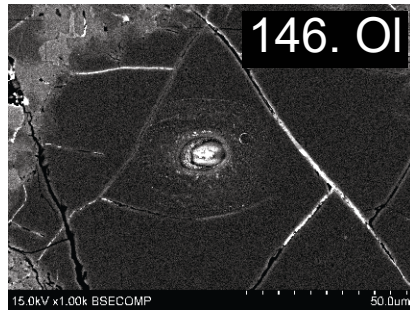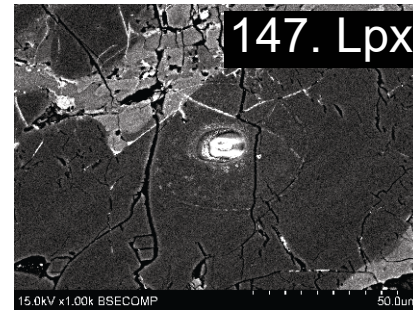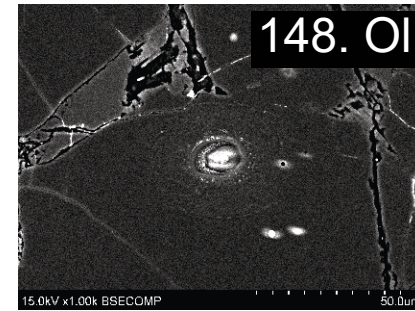



# #4

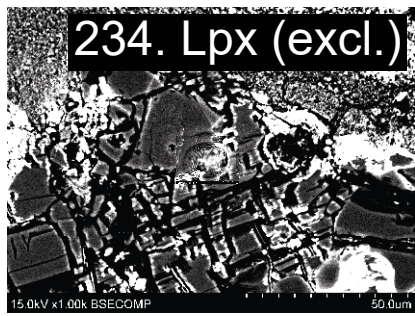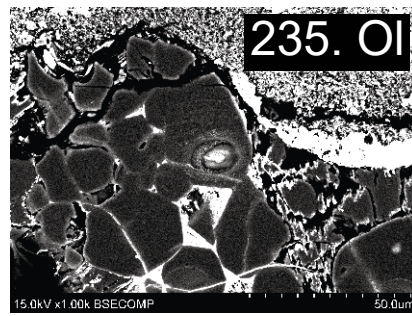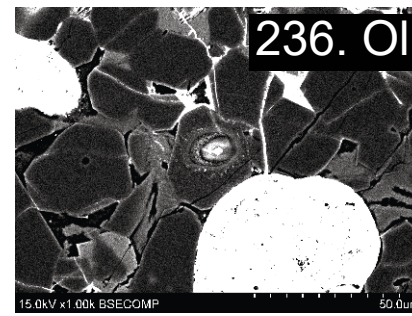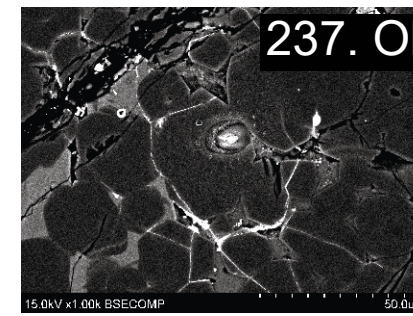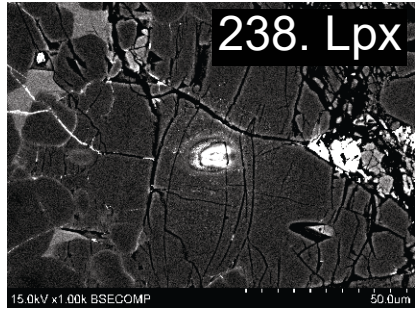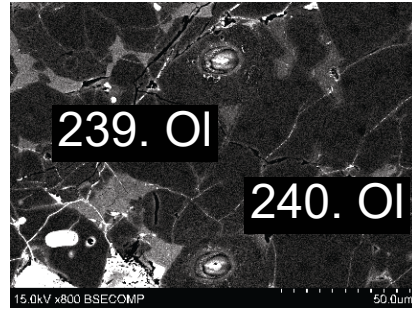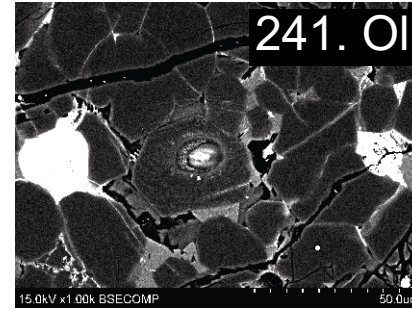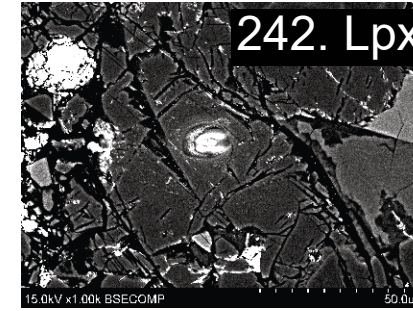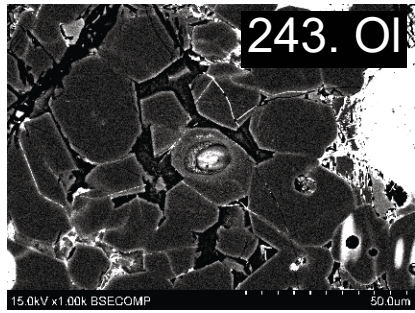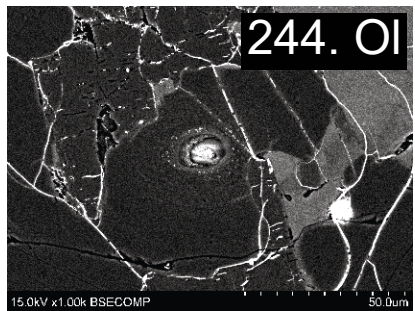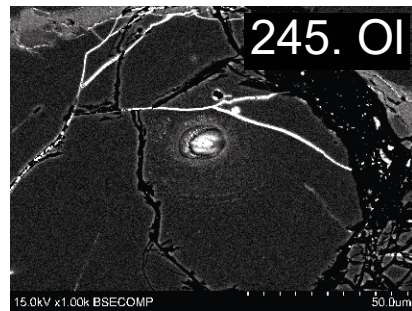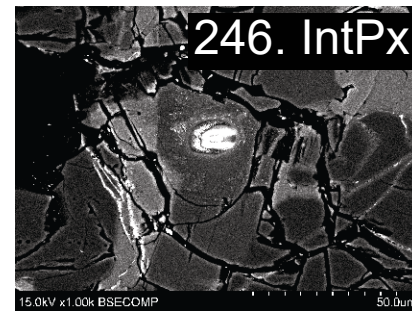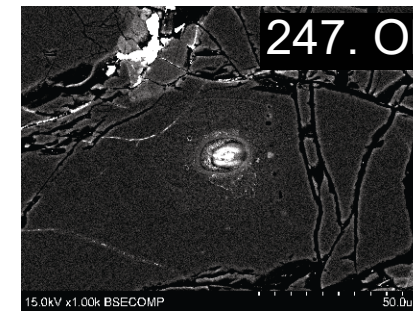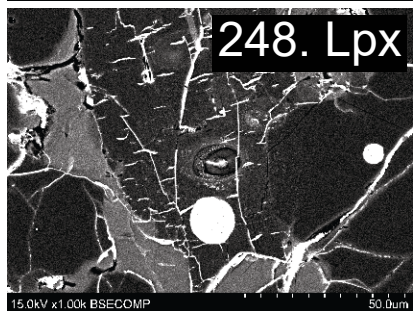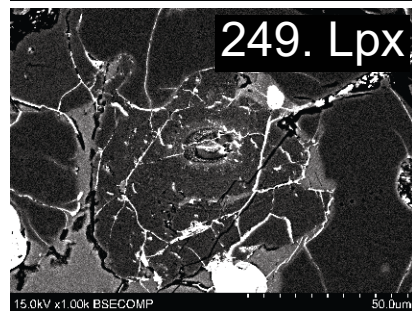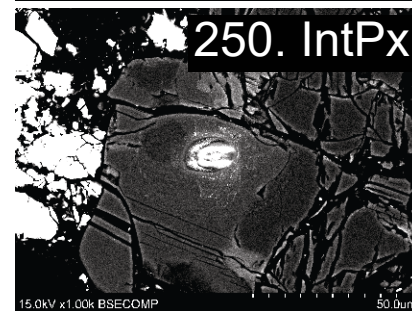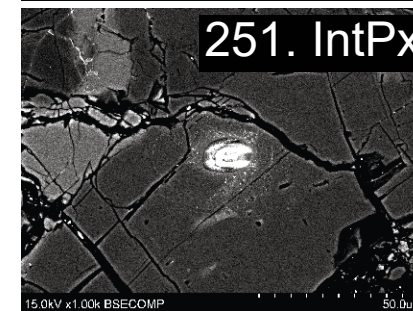

# #5



# #6

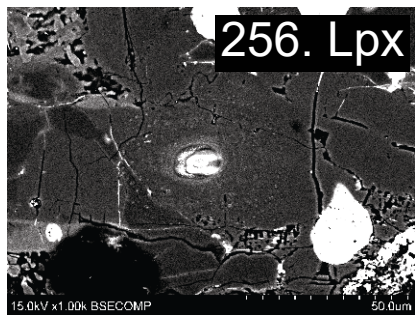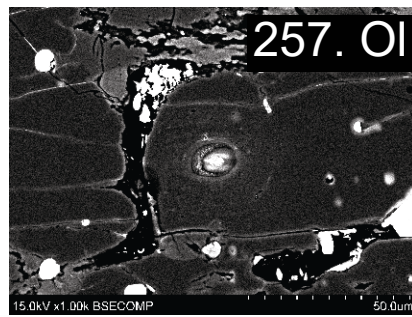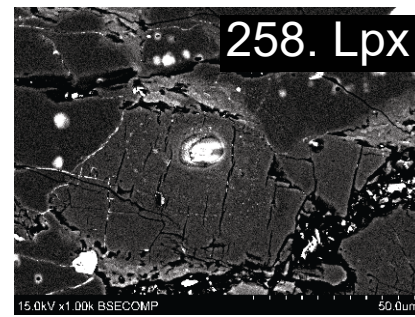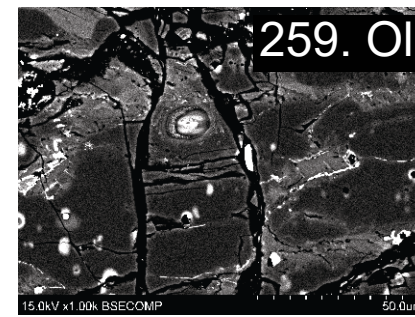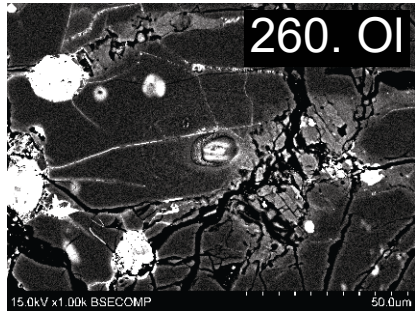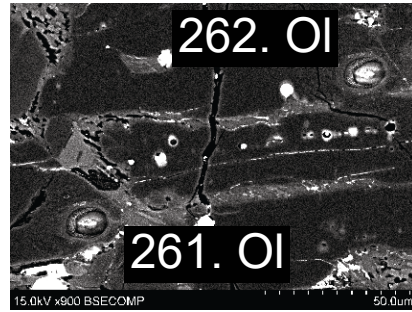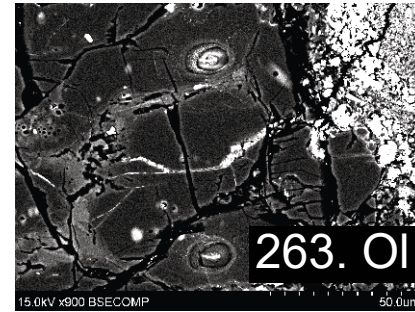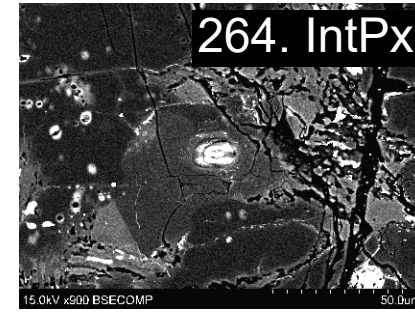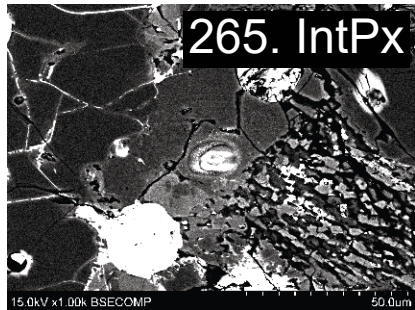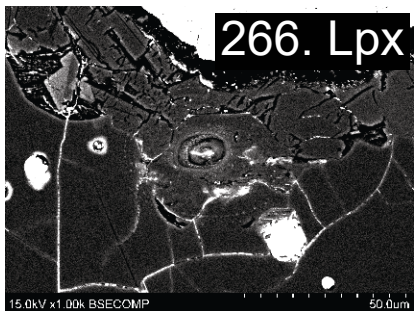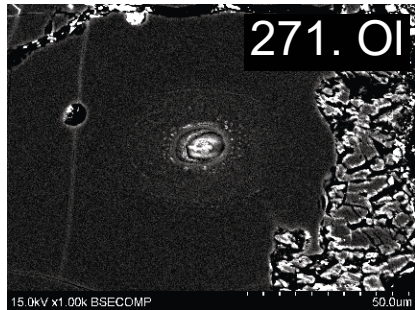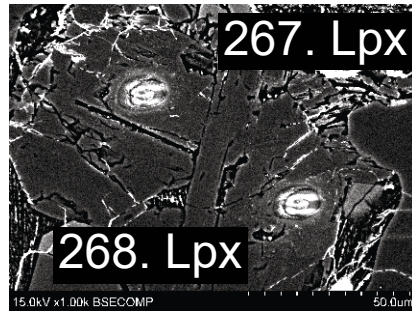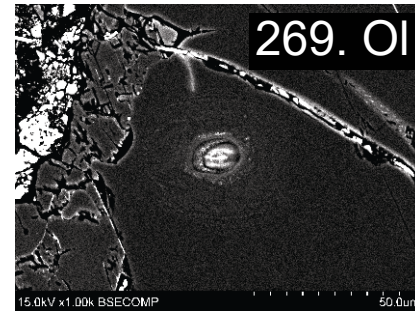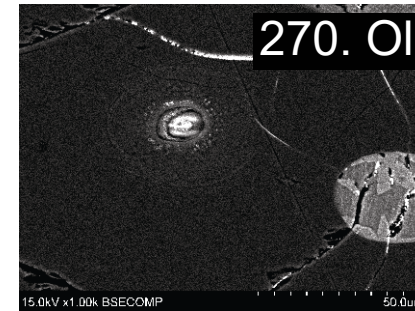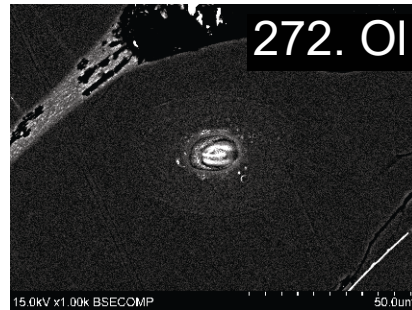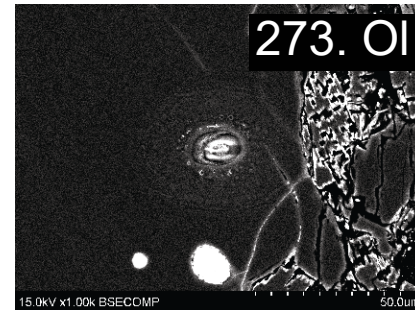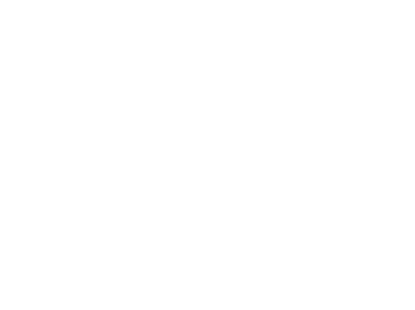

# #7



# #8

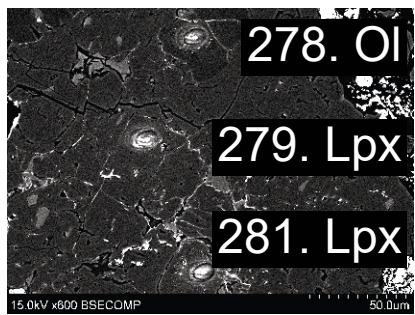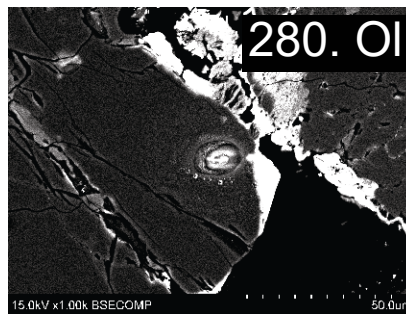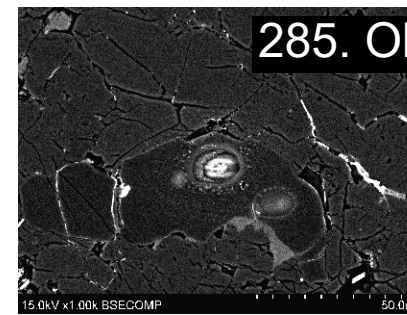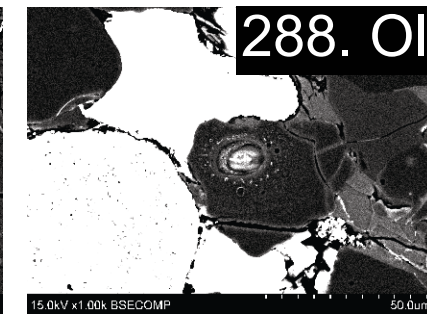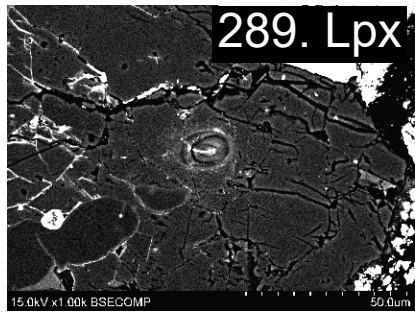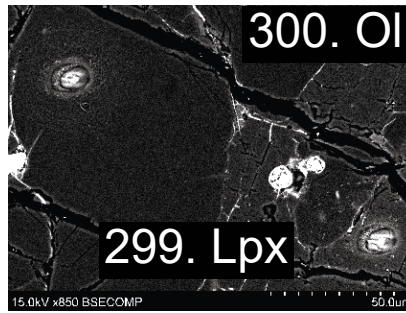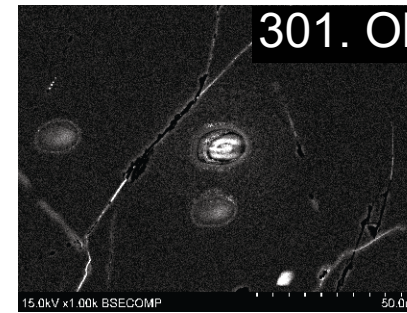

# #9

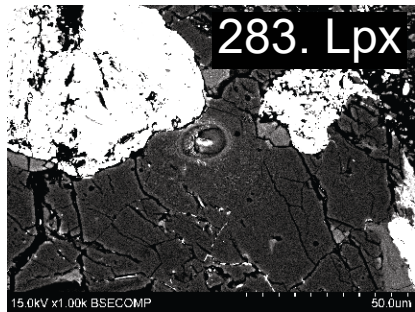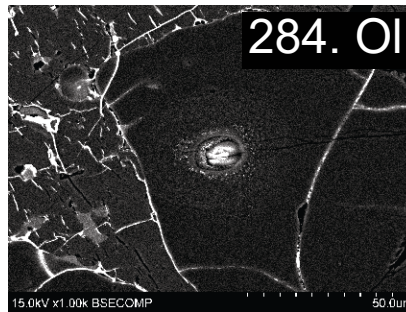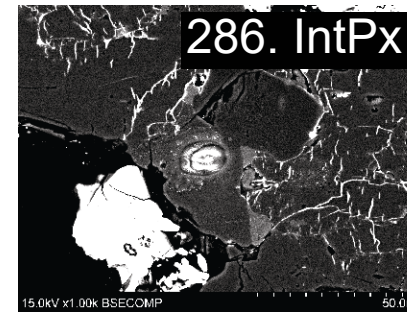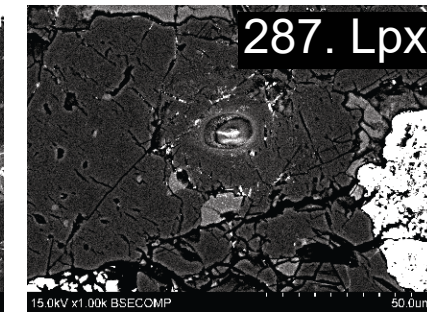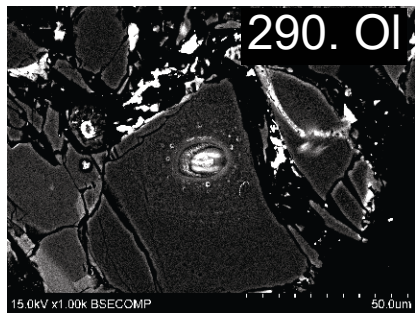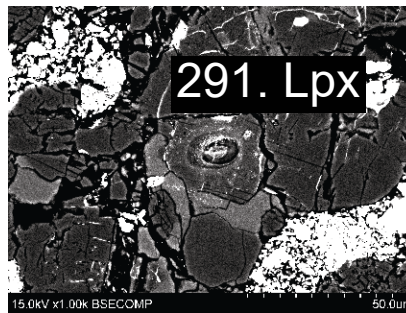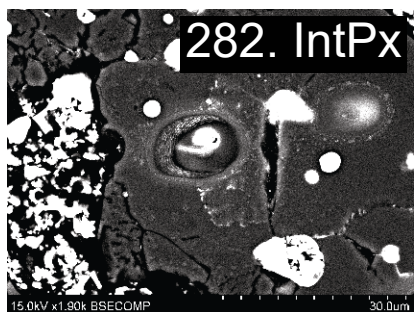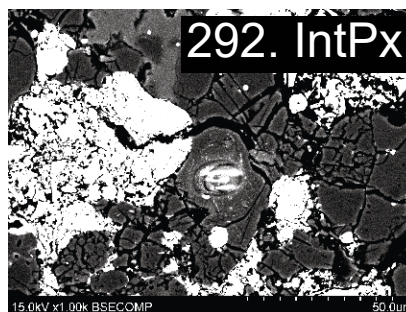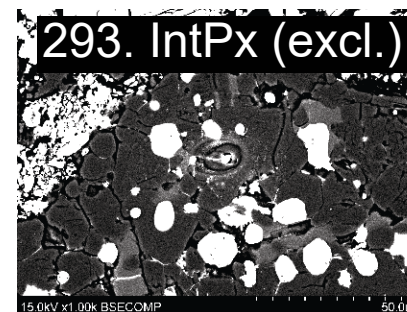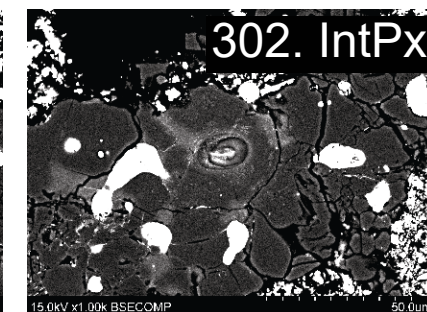

# Rim



# #10

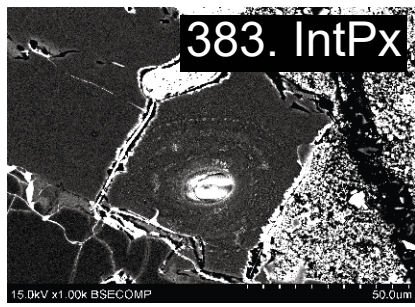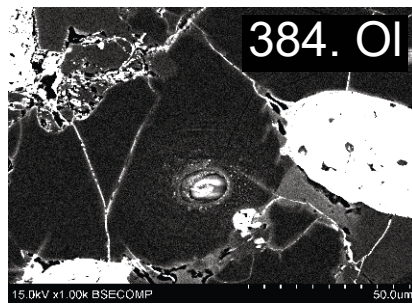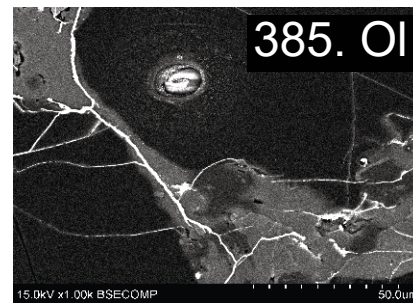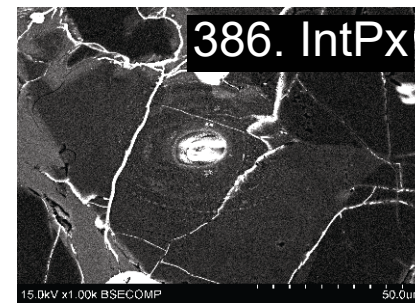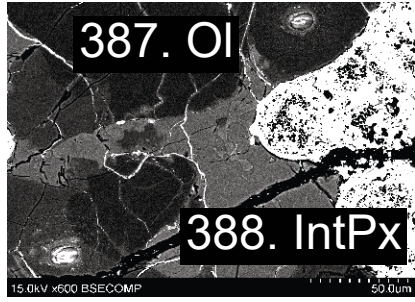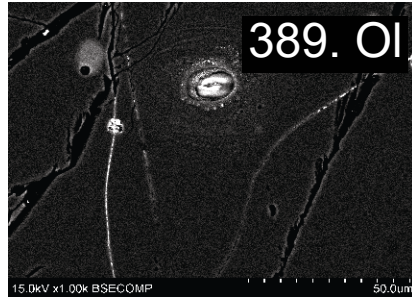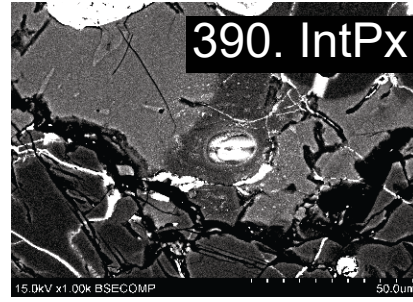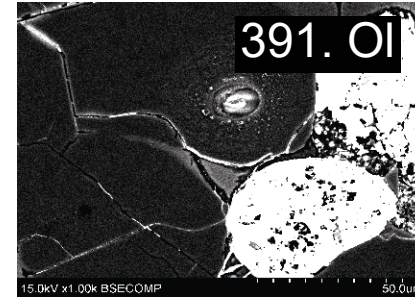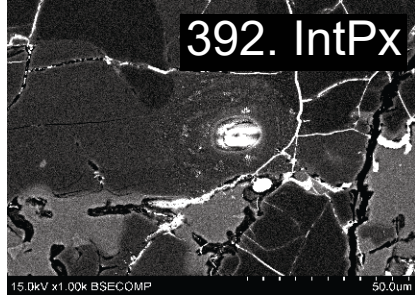

# #11

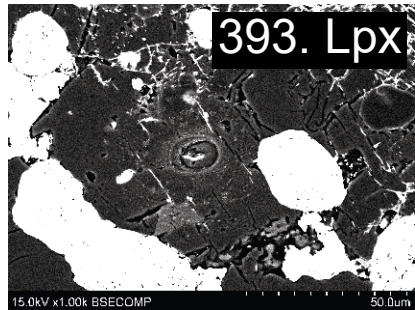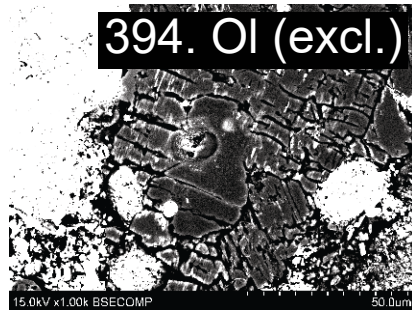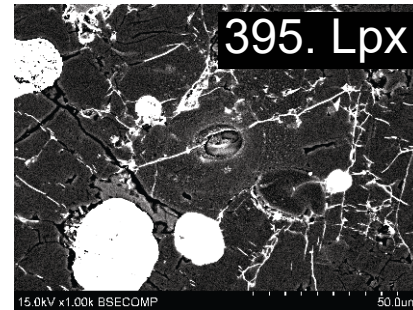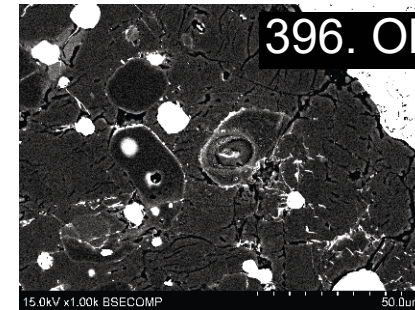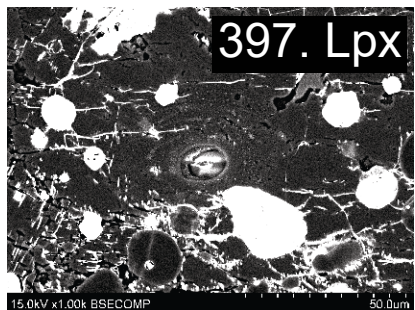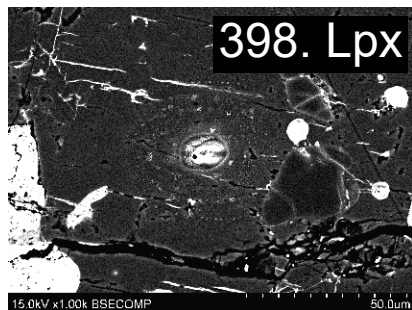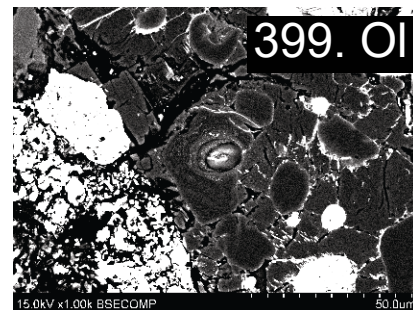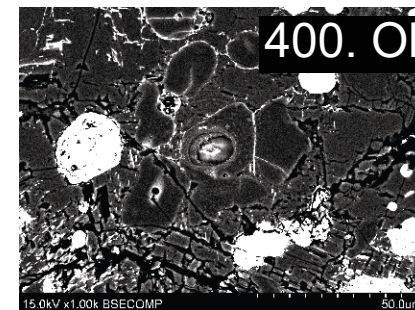



# #12

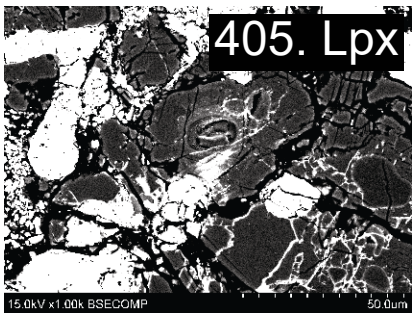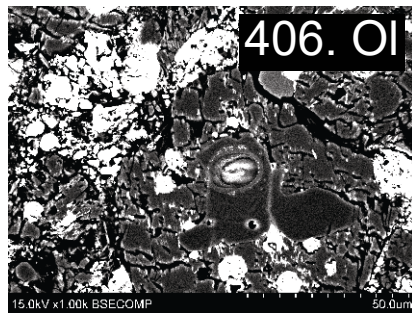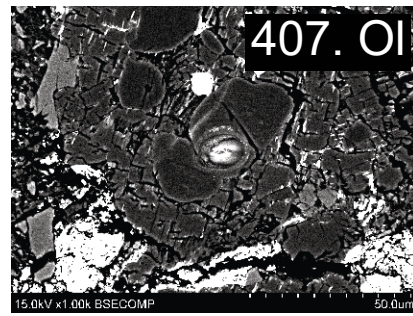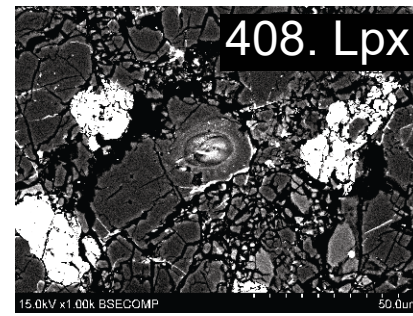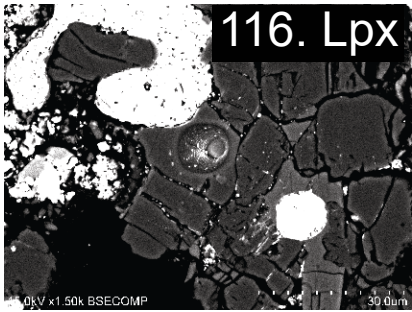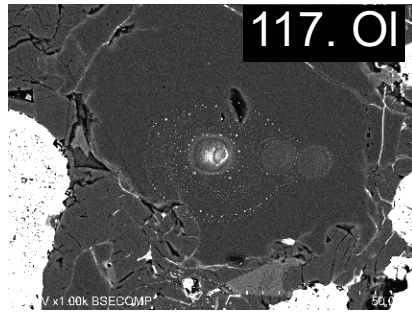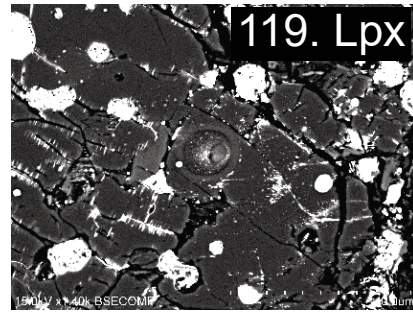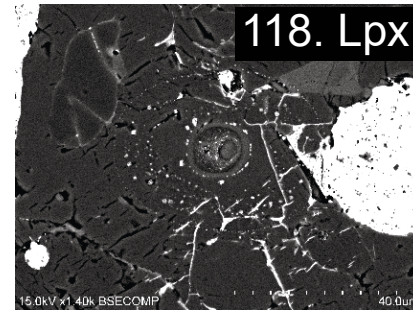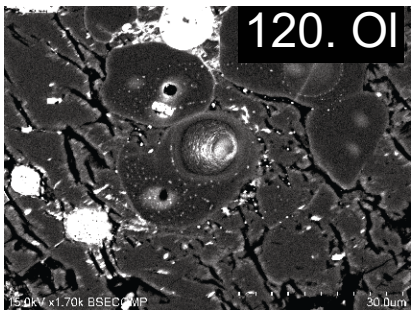

# #13

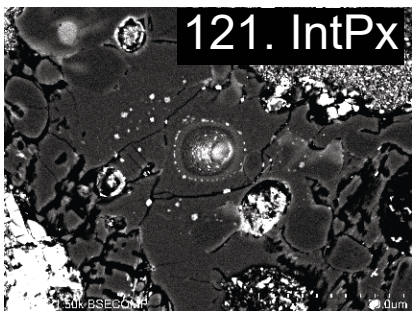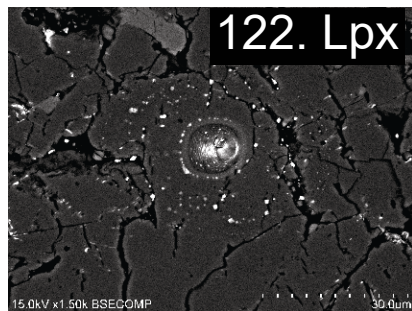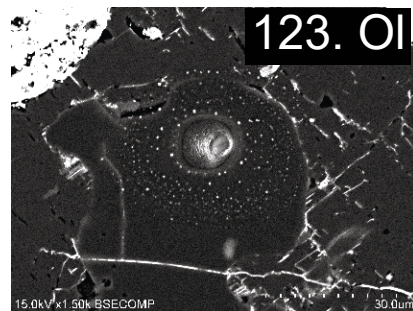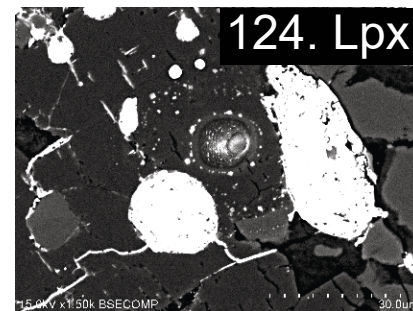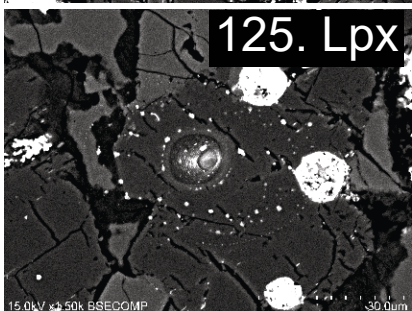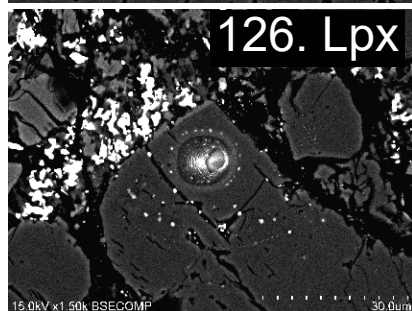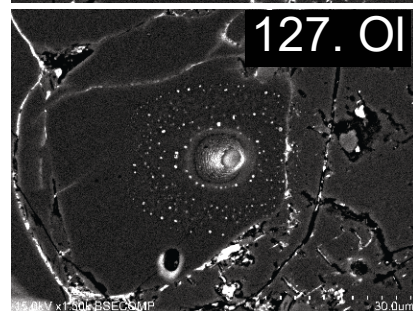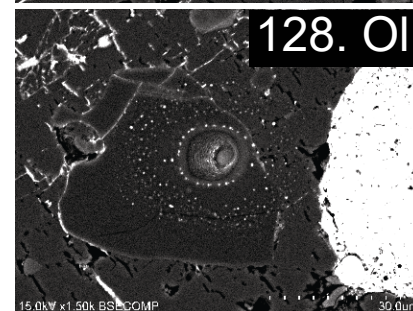



# #14

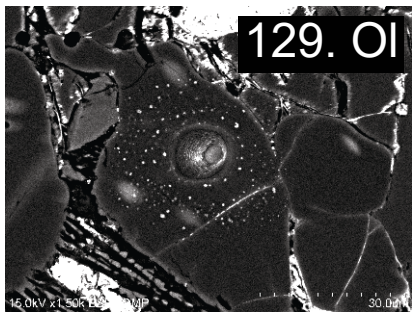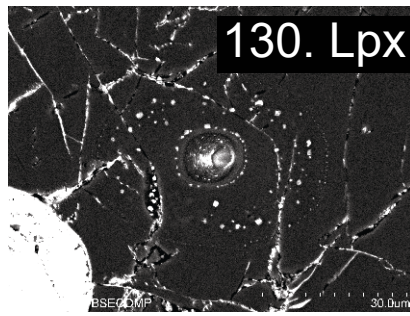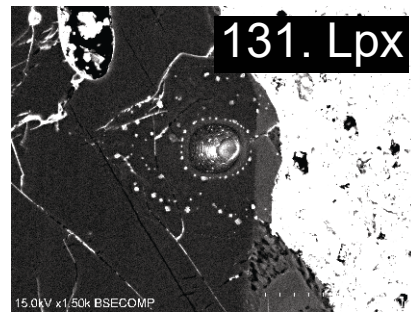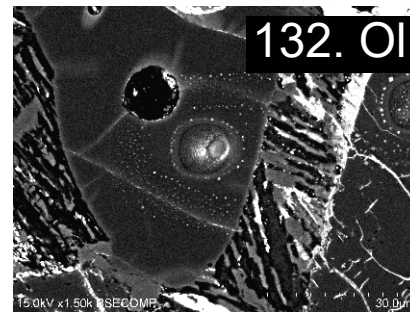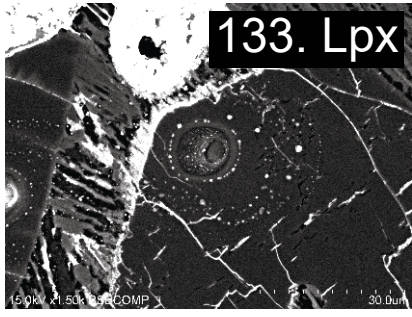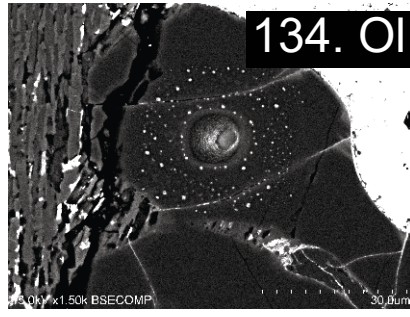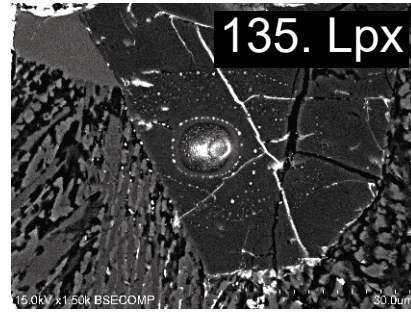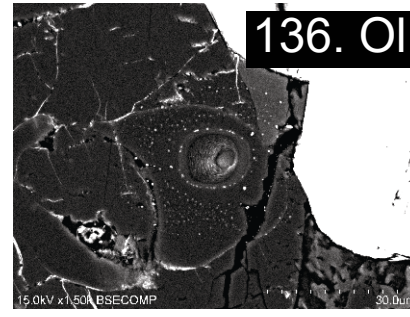

# #15

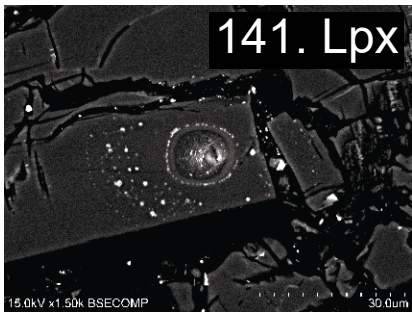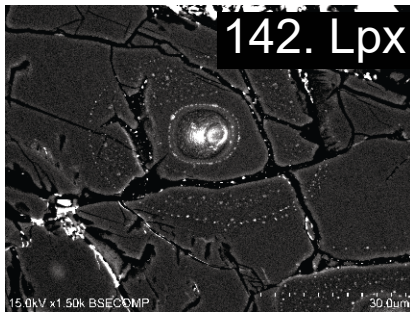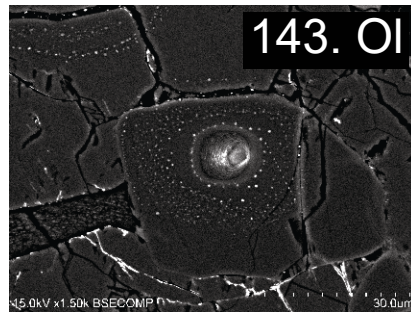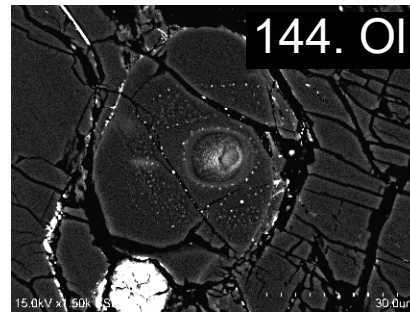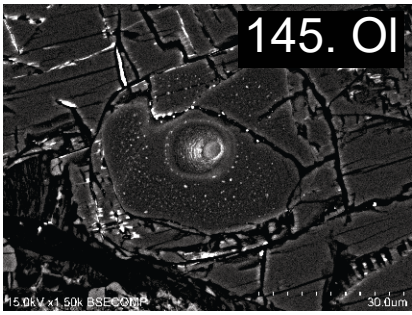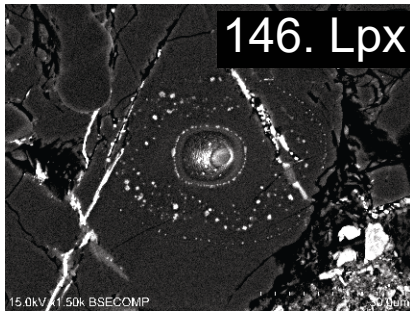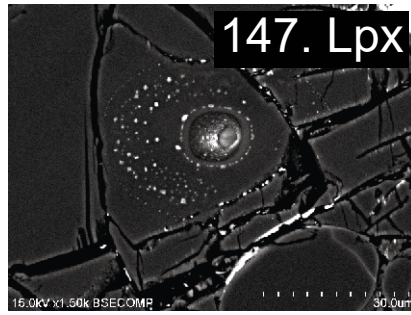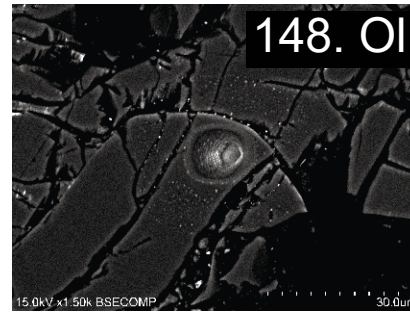



# #16

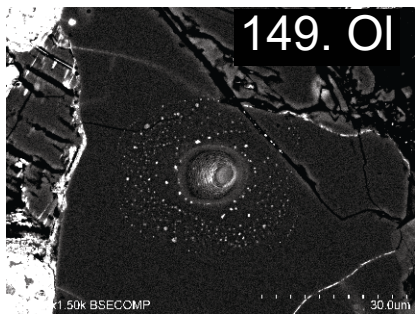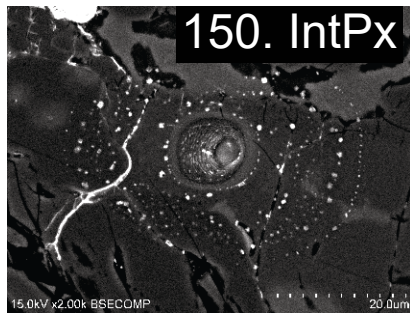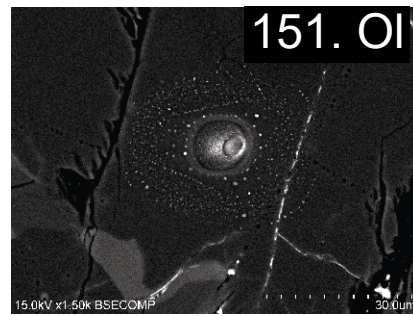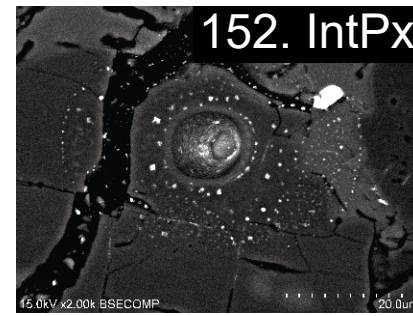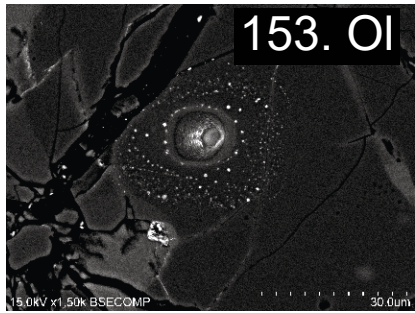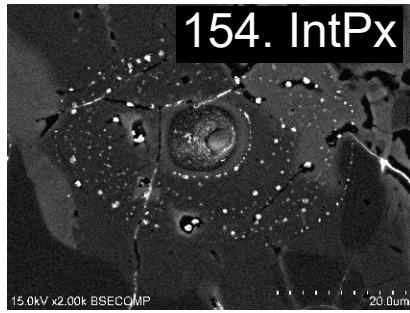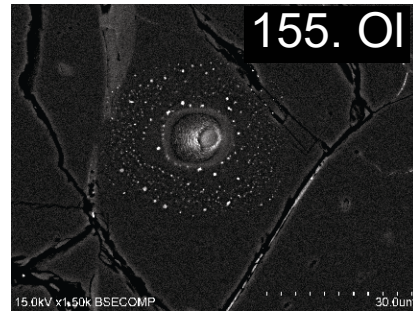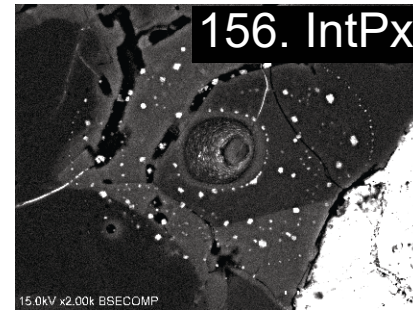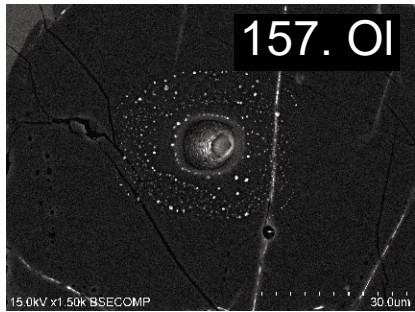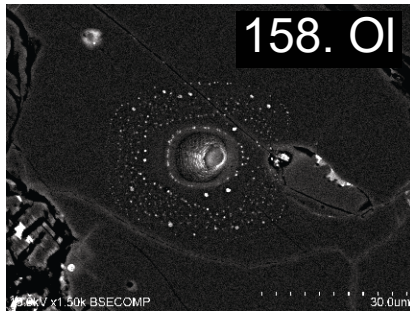

# #17

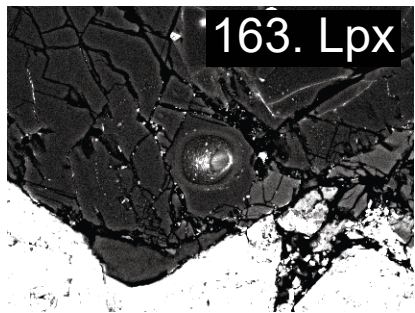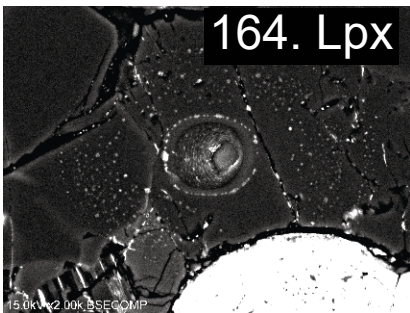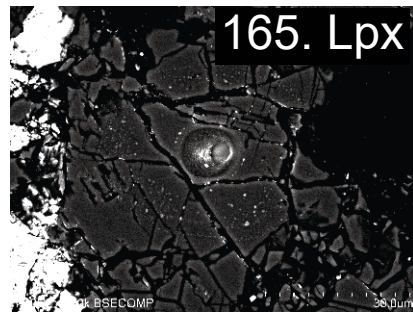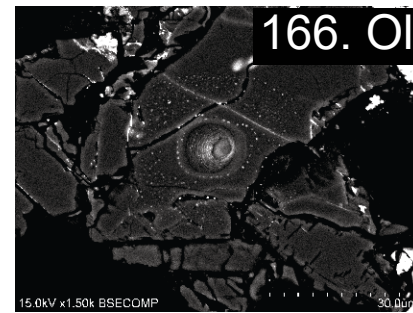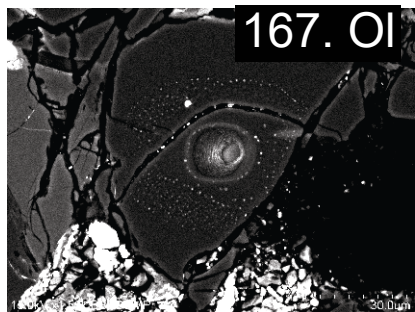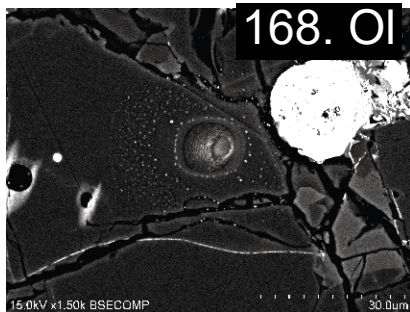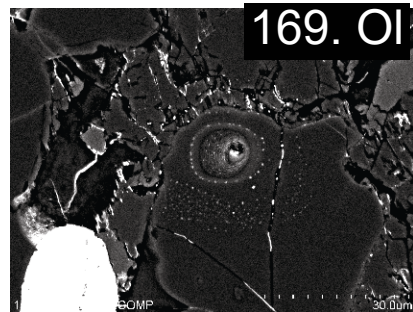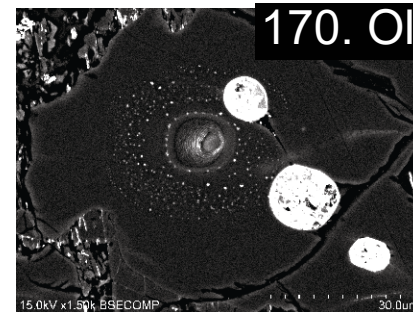



# #18

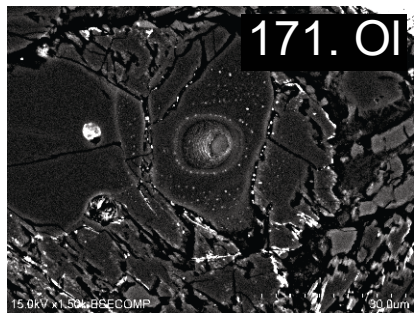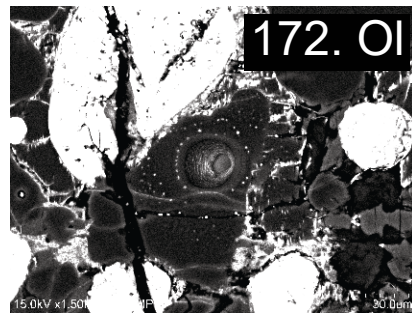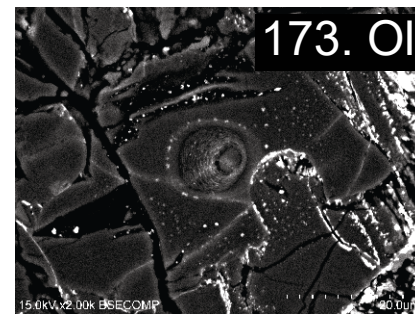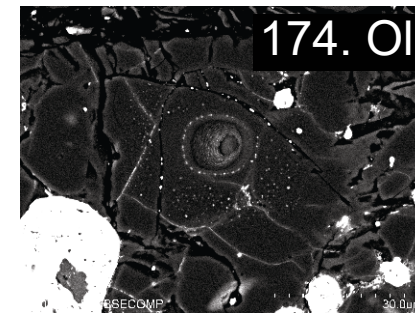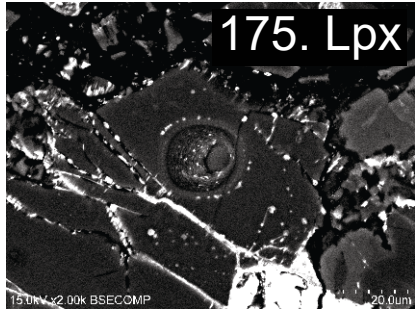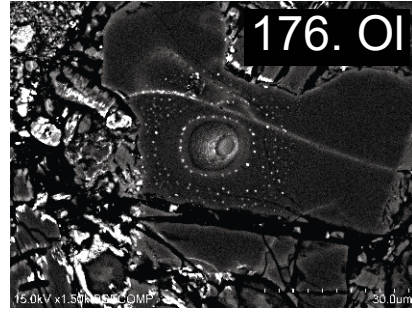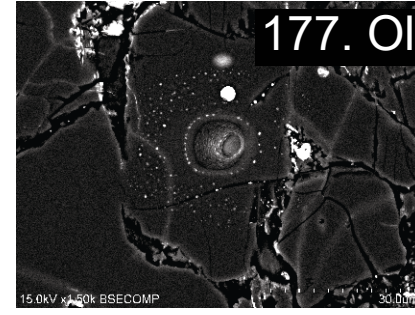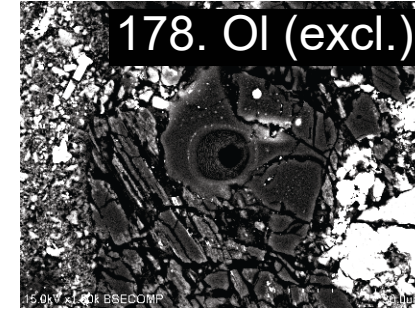

# #19

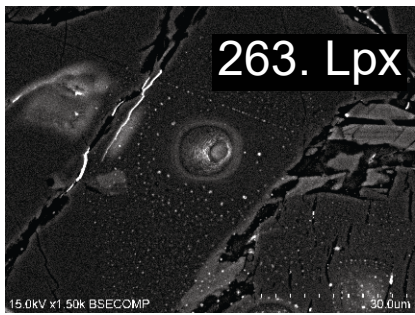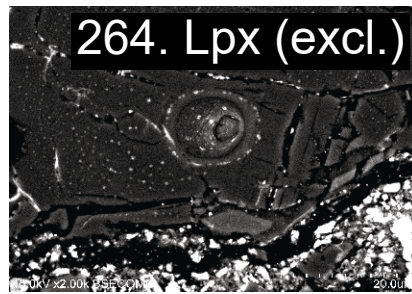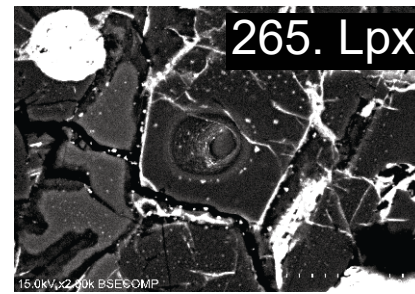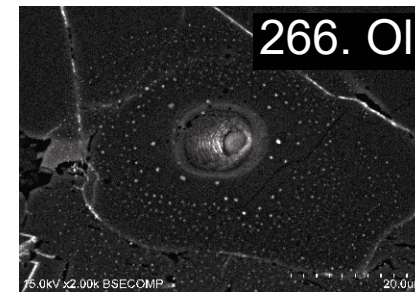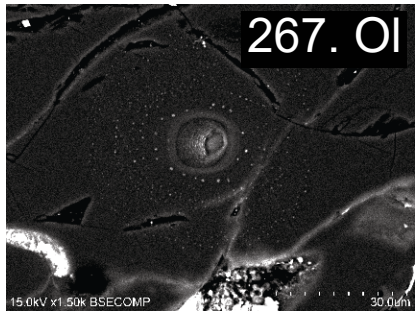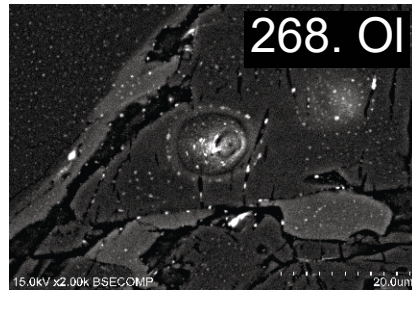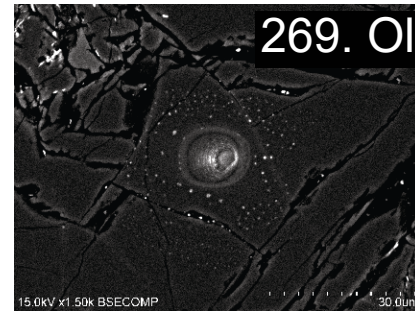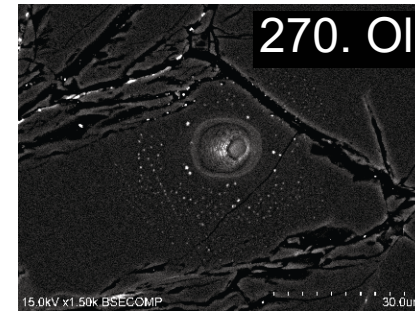



# #20

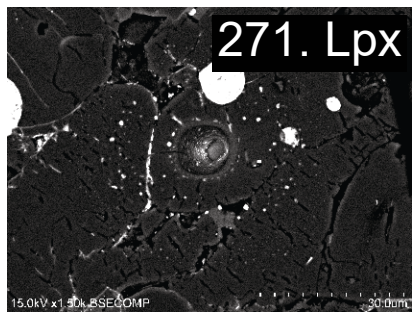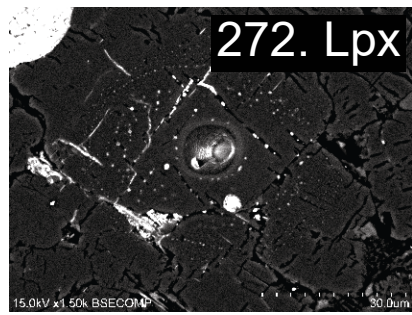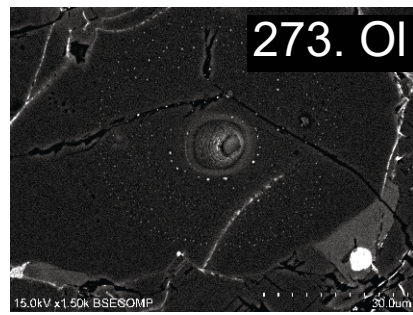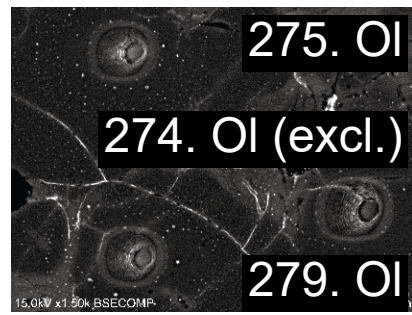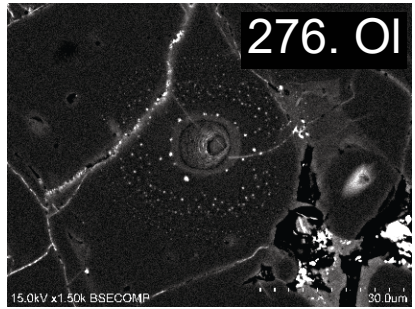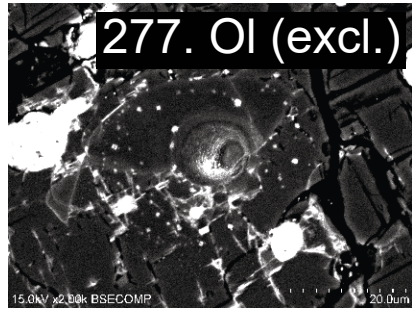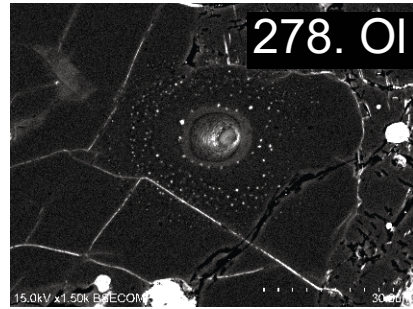

# #21

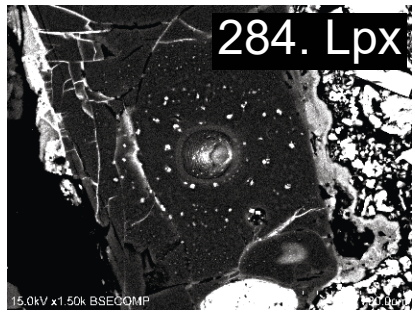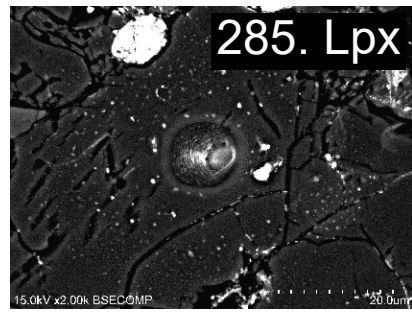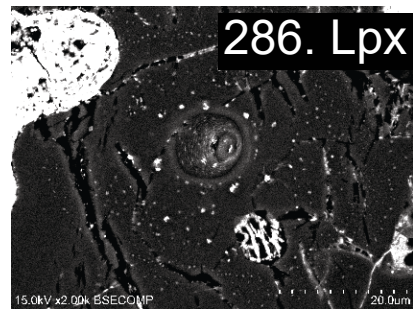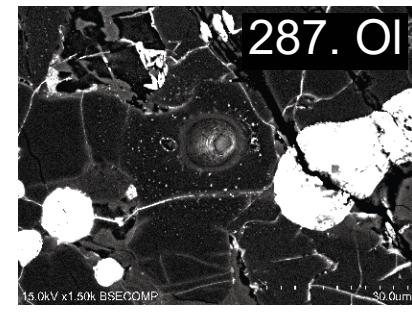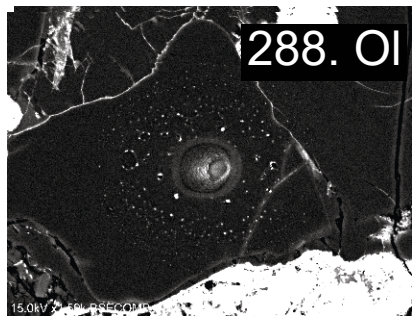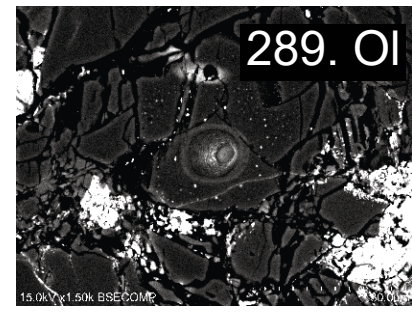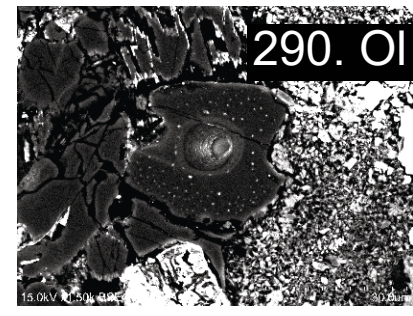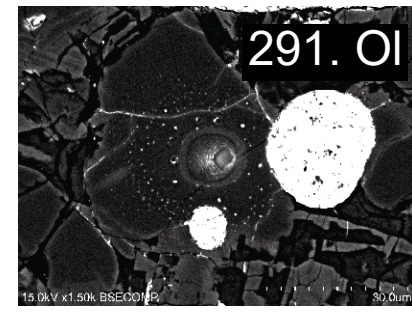



# #22

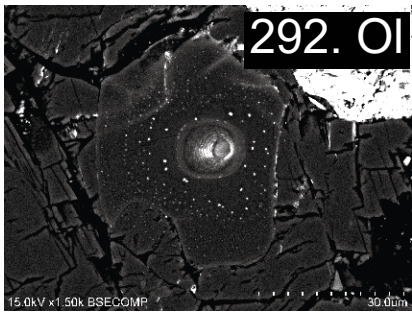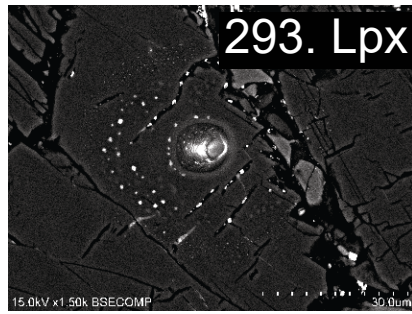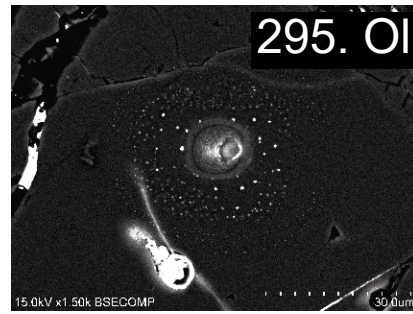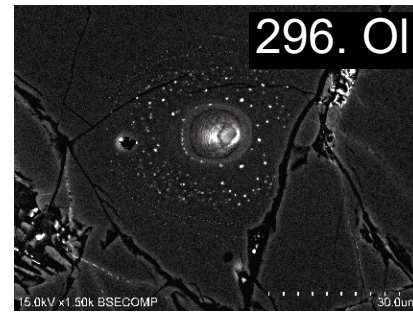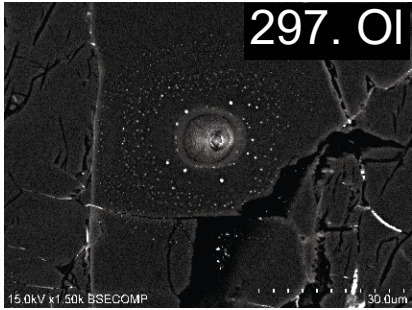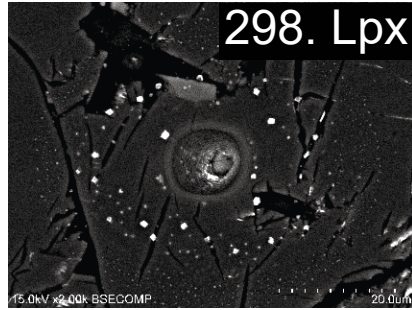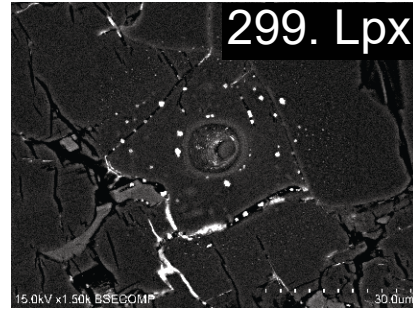

image for 294. Lpx  
missing. See EA2  
p. 22 for analysis  
position

# #23

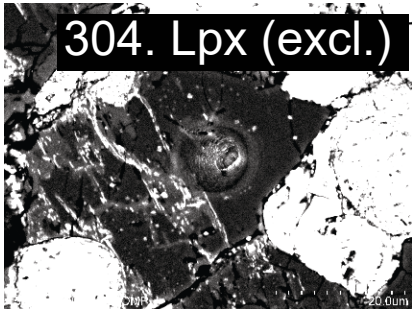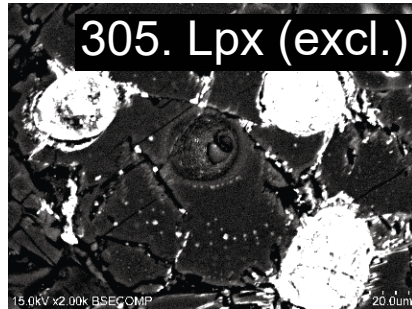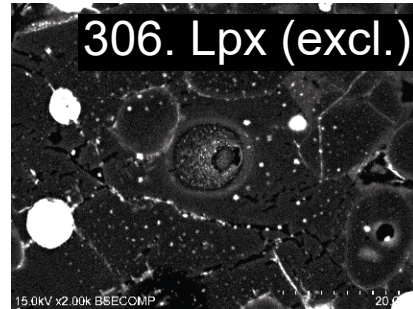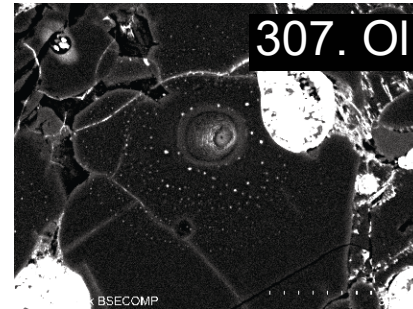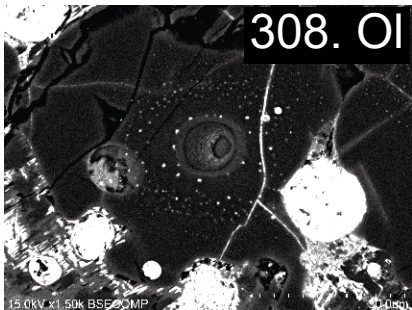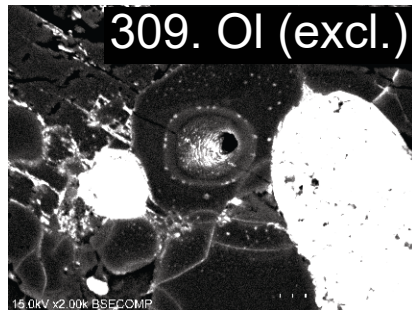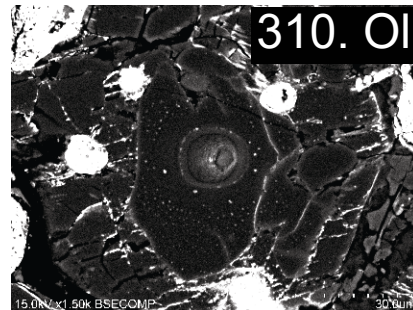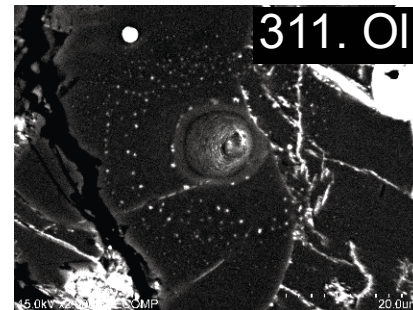



# #24

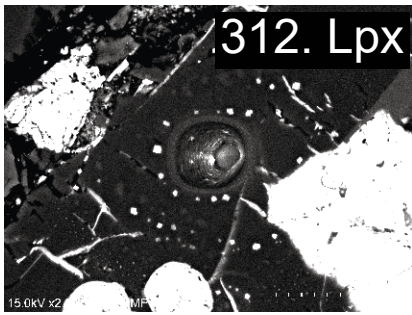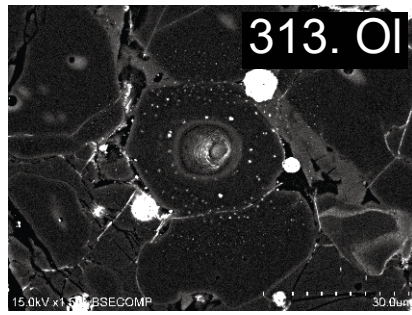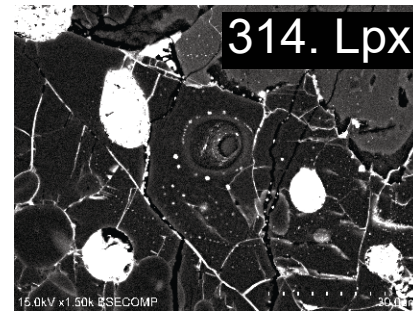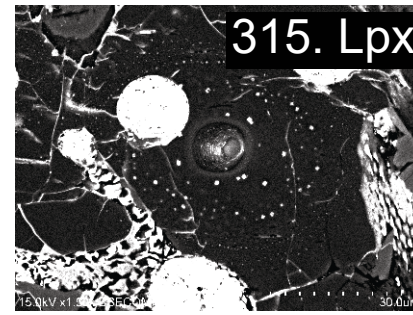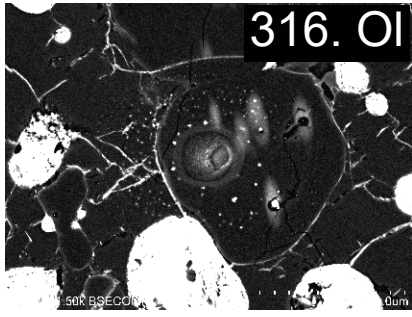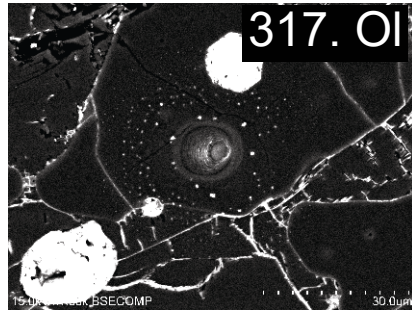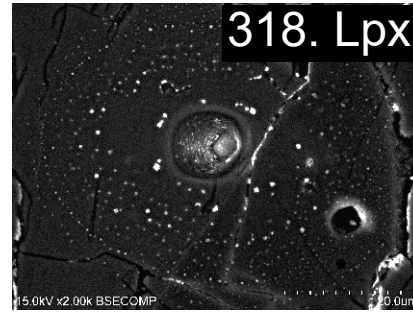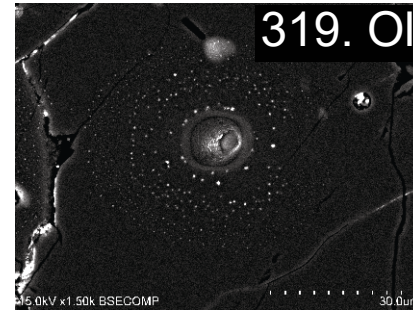

# #25

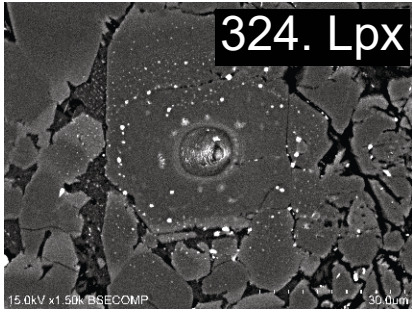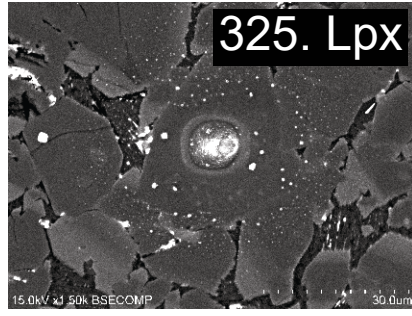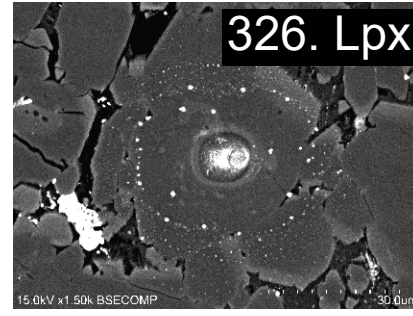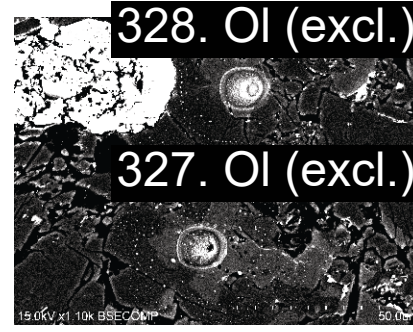

# #26

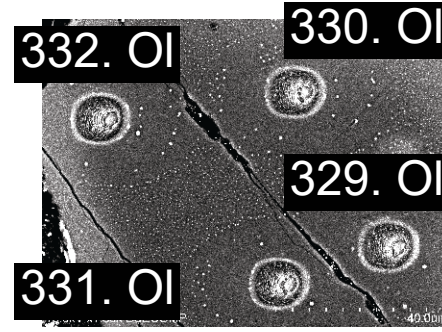

Supplement: NIHMS1006707-supplement-EA2.pdf [file NIHMS1006707-supplement-EA2.pdf]
