# Supplementary material
Source: PubMed Central journal article supplement (PMC6350813)

Hertwig et al. 2017: Formation of chondrules in a moderately high dust enriched disk: evidence from oxygen isotopes of chondrules from the Kaba CV3 chondrite

## EA6: Oxygen three-isotope diagrams of individual chondrules

TF: Terrestrial fractionation line

YR:

Young E. D. and Russell S. S. 1998 Oxygen Reservoirs in the Early Solar Nebula Inferred from an Allende CAI. *Science* **282**:452–455.

PCM:

Ushikubo T., Kimura M., Kita N. T., and Valley J. W. 2012 Primordial oxygen isotope reservoirs of the solar nebula recorded in chondrules in Acfer 094 carbonaceous chondrite. *Geochimica et Cosmochimica Acta* **90**:242–264.

CCAM:

Clayton R. N., Onuma N., Grossman L., and Mayeda T. K. 1977 Distribution of the pre-Solar component in Allende and other carbonaceous chondrites. *Earth and Planetary Science Letters* **34**:209–224.

- Olivine
- ▲ Relict olivine
- ◆ Pyroxene (Low-Ca + intermediate pyroxene)

Errors represent 2SD external reproducibility on standard.

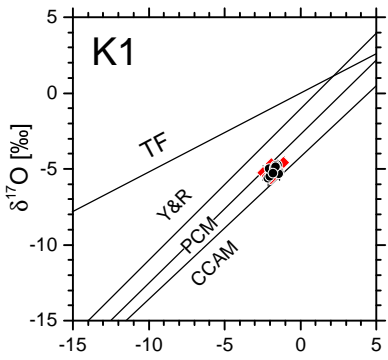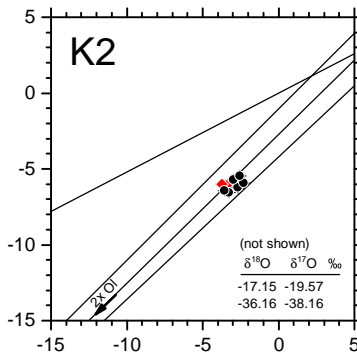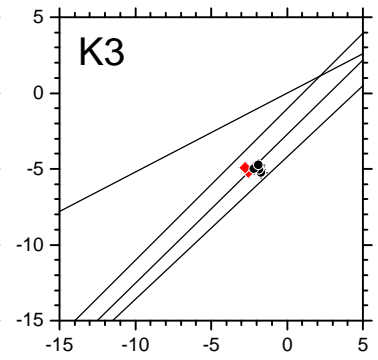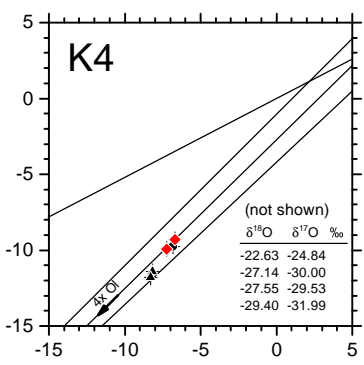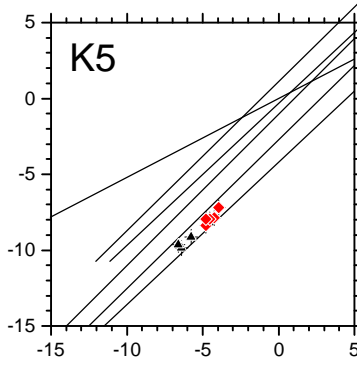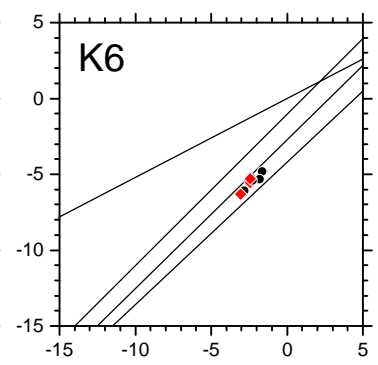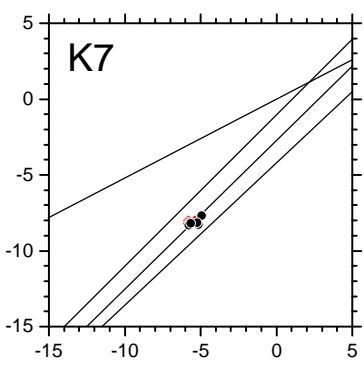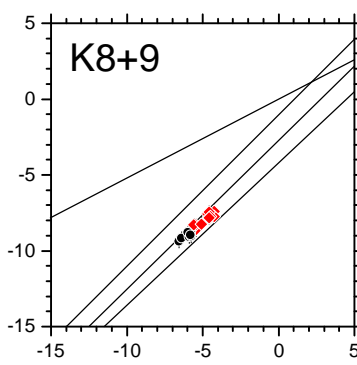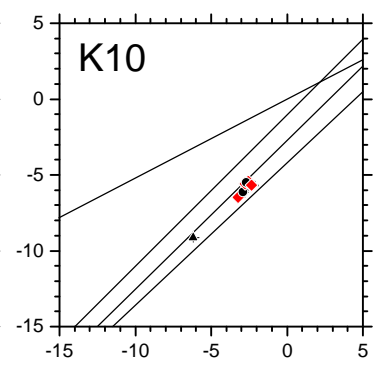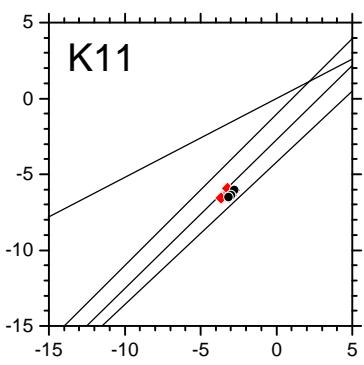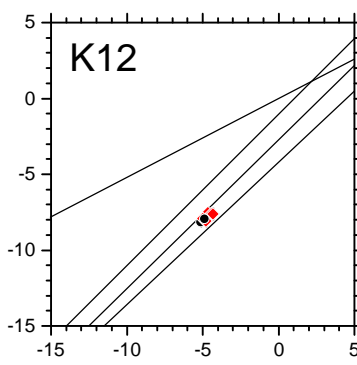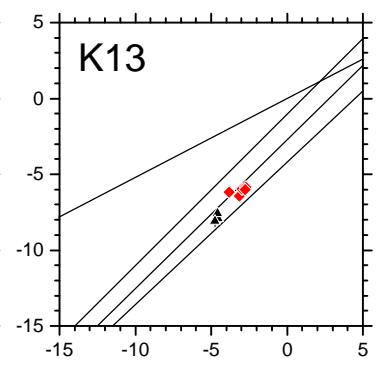

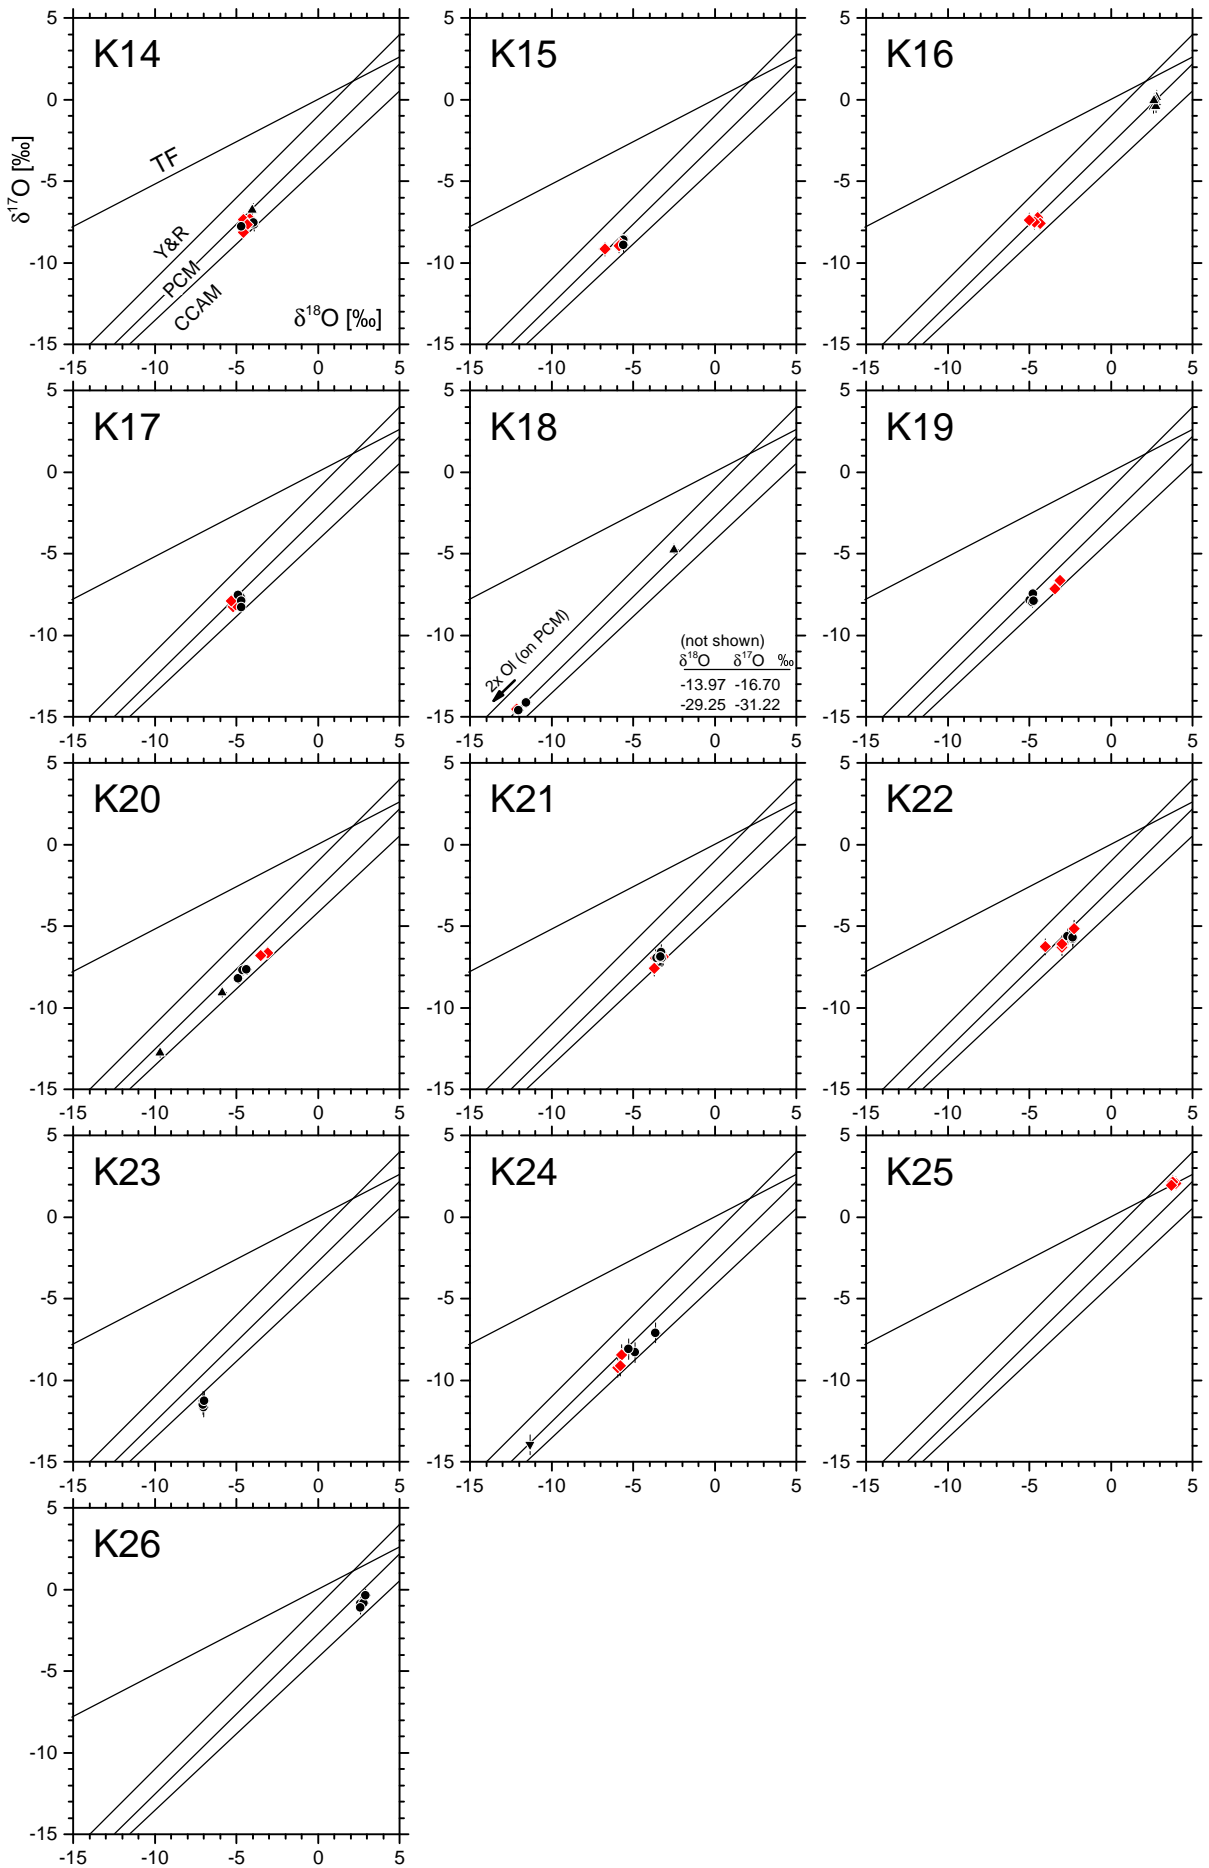

Supplement: NIHMS1006707-supplement-EA6.pdf [file NIHMS1006707-supplement-EA6.pdf]
